# Supplementary material for: Identification of a nine ferroptosis-related lncRNA prognostic signature for lung adenocarcinoma
Source: Research Square preprint supplement (doi:10.21203/rs.3.rs-210507/v1), 2021-02-11
Supplement: Supplementary file 1 [file 48bc37765180ff69d215fe40.xlsx]

## Sheet: expTime
Supplemental Table 1 Survival information of differentially expressed ferroptosis-related lncRNA in entire set
id	futime	fustat	CLDN10-AS1	AC114488.1	AC011503.2	SRGAP3-AS2	LINC01843	AP000553.2	AP003119.1	AL365181.3	AL365277.1	LINC01224	AC013457.1	AC236972.3	LINC01655	AC010789.1	AC027117.2	AC008063.1	AL512413.1	SLC12A9-AS1	LINC01214	LINC01705	SNHG4	AL606489.1	AC068305.2	LINC01876	AL109914.1	AC105219.3	AL035409.1	AC008875.1	AC099850.3	AC105219.1	LINC02398	AL157838.1	AC079467.1	AC111149.2	LINC01614	AL731533.2	AC092436.2	LINC01765	LINC00513	MACC1-AS1	AC004884.2	NAALADL2-AS2	AC108451.2	PARAL1	AC010719.1	AC145343.1	LINC02544
TCGA-44-A479	392	0	0.743923	0.93882	1.84947	0.0192788	1.62894	0.580649	0	0.594105	1.51046	0.361927	0	0.180144	0	1.04867	5.38524	1.43045	0.363117	0	1.24219	0.197453	0.835433	0.456661	0.349901	1.16168	0.380029	0.751445	0.390734	0.171037	10.9759	0.092783	0.772402	0.964654	0	3.09035	5.60836	1.72788	0.539993	0	0.103003	0.0868298	0.203239	0.0801796	2.26887	0	5.97923	0.853604	1.4279
TCGA-78-7143	4961	1	5.93109	0.249498	0.870678	0.29277	1.37007	0.93077	0.156616	5.38061	0.382301	0.12782	0.104178	0.718118	1.19517	0	0.70216	1.34946	0.772008	1.37007	0	0.0374818	1.55306	1.17027	0.721137	0.0105009	0.288559	0.721956	0.0847678	0.701294	9.58087	1.76127	0.0977485	0.62302	0.629176	0.51246	0.0975222	0.655997	0.102505	0.257411	0.221598	0.428548	0.578703	0.182643	0.391539	1.1793	2.11494	3.56481	0
TCGA-91-A4BC	44	0	1.11219	0.306233	0.341857	0	0.544967	5.40144	0.672801	0.720863	0.492695	1.20802	0.0298357	0.0244837	0.142619	3.10968	6.56508	0.0942622	1.02652	1.22618	0	0.375707	6.3742	0.806853	0	1.15784	0.206602	0.300138	0.546227	1.07861	6.01399	1.81589	3.84922	0.976529	0.0360381	15.642	2.69985	0.678427	0.880698	0.184301	0.447979	0	0.441962	0.639312	0.728867	0.0873472	9.77197	1.48499	0.776277
TCGA-69-7764	414	0	0	0	8.35358	0.103663	0.269505	0.693819	0	0.0740763	1.24535	1.47542	0	0.871779	4.2318	0.410092	3.56841	0.512776	0.781001	0.889367	0	0.159257	0.820983	0.552486	0.215021	4.46175	0.408688	0.544239	0.720343	2.35437	4.55413	0	2.35351	0.691601	0.748529	0.1528	0.460405	0.103233	0	0	2.10464	0.373511	0.491773	0.0862261	0.110908	0.0287975	2.75577	1.46876	0.767792
TCGA-78-7161	215	0	0.497557	0.0502328	0.950003	0.57766	0.321817	0.483286	0	2.35418	0.457975	0.23869	0	0.0361456	0.877293	2.90755	16.9394	0.13916	0.544013	0.241362	0	0.2113	1.76492	1.22171	0.294201	4.04763	0	0.853374	0.507735	0.805335	2.17339	0.248224	8.0246	0.32037	0.19508	1.10236	0.801748	0.924527	0.433395	0.483708	3.83955	0.0232297	0.190305	0	1.26917	0	0.198712	1.39303	2.10105
TCGA-44-3917	392	0	0.159628	0.66478	3.78598	1.34031	3.16192	0.830624	1.79248	0.277132	2.65769	1.95056	0	0	0	0	2.10099	1.78584	1.02849	2.03267	2.98529	0.381319	5.76736	1.83729	0	1.19294	2.20172	4.18572	1.14984	0	9.56899	0.477817	3.39766	1.08492	0	2.28661	5.62209	0.308969	0	0.654687	2.09969	2.1799	6.27988	0.344093	0	0.448184	0.765019	3.62663	1.24746
TCGA-62-A46R	1725	1	1.00399	0.40011	2.86911	2.53062	0.170887	9.45861	0.8351	0.16146	0.257494	0	0.093557	0	1.17394	1.21889	0.139097	5.72689	0.804725	1.8584	0	0.168303	1.44875	0.243277	0.681702	0.0235758	0	0.875797	0.666099	0.816403	8.10317	0.0790854	0.493779	0.519808	3.89871	0.575268	1.67861	0.818219	0.805478	0.529759	1.11209	0.185028	1.21264	3.50825	0.0439526	5.66056	0.791383	5.9662	0.82589
TCGA-55-5899	930	0	1.8633	1.00435	0.527619	0.0392846	1.35326	0.525866	2.99465	36.6694	0.102596	1.63795	0.0279578	0	0	0	0.831332	0.0883291	0.147986	0.689398	0.084374	0.553235	1.29146	0.697909	0.152785	0.873603	0.387196	1.23436	0	0.174262	25.0073	0.189066	0	0.0677825	0.0337698	0.651441	1.65753	0.146706	0	0	0.104945	0.0442336	0.414144	11.818	1.31344	0	2.00544	2.69607	1.50679
TCGA-86-8075	479	0	1.45384	0.950196	0.310459	0.0666276	0.853726	0.159264	0.127293	0.76093	0.994318	0.0623334	0.0948339	0.0444699	1.1333	1.74151	0.187994	0.0428023	0.501974	0.816607	0	1.3648	0.277348	0.620017	0.19743	0.457468	0.28144	0.113572	0.854323	0.25333	7.89375	0.274851	0.572021	0.574803	0.163641	1.17501	12.3017	1.16114	0.533206	0.195269	0.169514	0.27865	0.175599	0.475031	0.0763758	0.251195	1.26516	1.32753	9.51721
TCGA-73-4677	38	1	2.87964	0.0578878	0.661425	1.03816	0.412065	0.0265207	0.339149	15.5202	0.0206967	0.0968777	0.857266	1.25887	8.68097	0.195943	1.27455	0.0534557	0.746328	0.649002	0.0680829	0.162333	0.296051	0.258113	0.0205476	0.551434	5.85816	0.422366	0.137673	0.028123	0.852627	0.15256	0.343969	0.145853	0.98098	0.189821	0.334373	0.512978	0	0.325162	0.896221	0.0178465	0.187976	0.0109864	0.169574	0.121084	0.183195	0.929855	0.020963
TCGA-49-6742	445	0	0.177722	0.538278	0.657453	0.309501	10.3454	0.221946	3.13392	20.5565	0	0.994133	0.0629323	0.180752	0.225619	3.06097	2.37032	0.397653	1.49901	0.517273	0	0.0566054	1.04059	2.94558	0.171958	0.777069	0	0.457224	0.0640086	0.039226	8.72112	0.106396	0.221431	0.317868	1.97639	0.977585	0.147279	0.110077	0.619217	0.583117	0.37403	0.0497844	0.116528	0	12.3583	0.583429	0.170347	1.02778	0.0584784
TCGA-55-7724	705	0	0	0.224096	0.088294	1.71802	0.319039	0.205335	0	2.57593	0.721094	0	0.655	0.250835	0.104366	0	0	0.275919	0	0.239279	0.131782	0.157107	1.46698	0	0.0795441	0.858292	0	0.780931	0.977097	0.435482	6.60142	0	0	0.582275	4.1668	3.27852	1.22631	0.152758	0	0.629387	0.0819561	0	0.161711	0.127592	0	2.642	0.709189	0.815021	0.162305
TCGA-97-8172	545	0	0.348487	0.0633291	0.715281	0.0693584	0.191589	0.841394	0	0.108418	0.928329	0.26496	0.456583	4.4354	1.50418	0	5.33281	0.83822	1.30637	1.75811	0	0.377383	0.667192	1.64291	0.539496	0.0435348	0.598156	0.648274	0.276125	0.769164	0.932773	0.292076	0.115785	5.82904	0.581311	0.559096	0.308045	0.280598	0.0607097	0.0762271	0.0694817	0.136668	0.137097	0	0.139136	0.999512	1.3862	0.74855	0.963208
TCGA-86-7701	474	0	2.97635	0	1.47991	0.411371	1.02493	0	0	4.76155	0.716229	0.0299334	0	0.120122	0.23324	0.33904	4.73958	0.53955	0.903958	1.73792	8.54077	0.0877763	0.81961	0.710519	0.444417	2.77882	0.337879	1.00897	0.595537	0.364959	10.7574	0	5.83723	0.985817	0.176811	33.7922	2.66445	1.62158	0.120025	0.100469	1.37368	0.0771992	1.26488	0.0950487	0.733536	0.0476161	2.77359	0.455356	1.63225
TCGA-49-AARN	1135	1	6.00702	0.80449	1.14596	1.6012	2.6761	1.10571	0	7.27607	0.265505	0.277407	0	0.653095	0.432309	0	0.358562	2.0001	0.191483	1.98229	0.109174	0.195231	1.12037	1.05355	0	0.893367	0.250502	0.768262	0	1.75877	2.27871	2.44638	0.424285	1.00862	0.699132	0.327802	1.35457	0.506205	0	0.893849	0.135792	0	0.133968	0.105703	1.15566	0.105907	5.18979	1.06907	1.81522
TCGA-49-AAR9	260	1	0.140191	0.849211	0.989826	0	4.11814	0.194529	0.738522	2.03147	0.15181	0.183994	0	0	0.0988739	2.15586	0.0410036	0.0326747	1.36857	0.0566716	0.124847	0.706983	0.390875	4.94827	0.188395	1.33435	0	0.658913	0	0.309423	13.6155	0.0699392	0	0.911027	0	0.0535514	1.80719	0.470335	0.101761	0	0.232929	0.0981776	0.0766001	0.100731	0	0	0.167966	1.35123	2.07581
TCGA-62-A46S	1653	1	0.846363	0.591562	1.11358	0.175468	0.105273	1.30992	0	0.391835	0.211502	0.0117858	0.153693	0.220715	2.57136	0.667455	9.78764	0.121393	2.13551	0.894824	0	0.276483	1.71438	0.759333	0	2.41092	0	1.02	0	1.19747	1.63371	0.389758	2.34337	0.970371	0.928217	2.63615	0.179842	0.201622	0	0.0395579	0.649034	0	0.177866	0	1.98562	0.018748	2.91214	1.13549	0.107112
TCGA-86-8359	444	1	3.70202	0.0479169	0.132155	0.0983978	0.358143	0.790294	0	0.175784	0	0.0429595	0	0	1.80759	1.2651	0.99949	0.0442482	1.26026	0.46047	0.084534	0.201558	0.455807	1.04885	0.2041	1.25642	0.193965	1.20539	0.170939	0.0698369	1.76442	0.852408	0.788461	0.294281	0	2.90078	1.26736	0.391957	0.757926	0.115352	0.0876203	0	0.0518661	0.0545643	7.57977	0	1.78178	1.91697	0.364397
TCGA-78-7147	586	1	0.540474	0.363771	1.37354	1.41931	1.37564	1.08328	0.166503	0.366989	0.13006	0.146761	0.0886039	0.857977	3.13419	0	0.140515	0.391906	0.703497	1.01959	0.106959	0.063757	0.781371	0.184318	0.290525	0.0178621	0.12271	0.267399	0.0360477	1.78936	10.6601	0.47935	0	0.408152	0.064214	0.0688184	0.110591	0.464941	0	6.38544	0.133037	0.252334	0.098438	0.0172598	0.0666012	0.622554	4.05322	5.09909	0.329333
TCGA-67-3773	427	0	3.9124	0.0569699	0.561153	0.0935906	0.243319	0.861305	0	0.606088	0.122211	0	0.0999086	0.765209	1.98991	0	0.858235	1.78868	0.705114	1.00369	0	0	0.332147	0	0.606653	0.0503528	0	0.241957	0.406469	0.664251	0.839108	0	0	0.134569	6.35572	0	1.97443	0.174754	0	0	0.0833396	0	0.369991	0	0.0625822	0.974977	1.12681	2.43454	0.680811
TCGA-55-A494	481	0	4.1808	1.33661	1.57988	0	7.3612	0.918534	0.0772783	12.523	2.45229	0.807296	0	0.118113	0.786302	0.785796	7.66298	4.57983	0.707441	2.3661	1.61339	0.110967	1.92121	4.61953	1.61059	3.47155	0	2.76942	0.0418267	4.22934	5.56934	1.32097	1.35049	21.7101	0.198689	2.18259	0.12832	0.107896	1.01157	0.0423378	1.1706	0.260255	0.494949	0.0600806	3.12977	0.140459	0.278285	4.02965	0.496769
TCGA-55-7281	872	0	9.26986	0.26487	1.40139	0.388509	0.505027	0.26003	0	2.42227	0.0405855	0.278175	1.50411	0.726058	3.0134	0	0.131545	1.08319	0.468327	0.484826	1.20157	0.397911	0.185774	0.138041	3.14285	0.289844	0	0.259599	0.0449952	0.330889	2.36862	0.0747913	0.415083	0.366453	0.667939	0.0572666	6.41889	0.154758	0.0544102	0.227725	0.166059	0.174981	0.122871	0.366247	0.0831323	2.22331	0.329302	0.963312	0.575508
TCGA-64-5774	2550	0	5.3363	0.0792274	1.01451	0.0813471	0.655612	0.707795	0.0435162	0.57403	0.0424895	0.97312	0	0.095015	0	3.94218	1.23944	0.329227	0.551584	0.761356	0.4892	0.458236	0.863048	0.337205	0.970214	1.22544	0	0.245894	0.329742	0.0288677	13.8574	0.3132	1.57526	0.36493	0	31.5653	3.17937	1.82271	0.113925	0	2.54979	0	0.128636	0.0451092	0.0435162	0.0225982	0.595478	1.90895	0.258217
TCGA-NJ-A55R	603	0	0.574385	0.626284	0.349571	0.0357244	3.80796	1.67373	10.0139	28.6267	0.765047	0.633235	0	0.116835	2.94104	0.812626	3.79004	0.385556	0.403723	0.835893	0.122764	1.29891	2.89334	1.73474	0.166727	1.56324	2.60558	1.02303	0.268932	0.684587	1.92177	2.23511	0.214695	0.1767	0.466782	0.473923	2.63384	1.7788	0.0250158	0.188459	1.41243	0.0965398	0.508425	0.0198102	0.32488	0.00992422	3.1106	1.40777	1.36078
TCGA-49-4494	1081	1	14.1706	0.0411106	0.404939	0.194168	3.77504	0.0282516	0	1.04063	0.044095	0.00737147	1.99466	0.0690237	0.402067	0	1.26246	0.512501	0.063603	4.77367	3.95269	0.475551	0.391063	0.674899	7.39835	0.109007	0	0.631248	0.097772	0	3.70879	0.0406294	0	0.0922523	0.304793	0.933279	1.55602	0.252211	0	0.173192	0.541255	0	0.311492	0.37451	0	0.656658	0.162626	3.7379	0.446624
TCGA-05-4389	1369	0	0.554413	2.80739	0.279112	0.0215514	6.2053	0.216366	5.82205	6.17458	0.056284	1.19966	0.950927	0	0.98976	2.87745	0.608088	0.048457	0.243554	1.38674	0.879459	0.220729	1.55384	2.64818	0.167635	0.0231898	1.4869	0.805742	0.0623994	0.0573597	8.11542	0.311162	0.395751	0.148741	0.815143	0.655193	0.933246	1.01944	0.113184	0	1.20903	0.0242664	0.255597	1.71794	0.057644	1.46681	0.539709	1.98003	0.171025
TCGA-49-4506	999	1	0	0	0.0415893	0.121386	0.552269	0.0580315	0.858068	18.75	0.0679316	0	0.0740461	0	0	0	0.293571	0.019495	1.33913	1.62299	0	0.66602	3.93867	0.128362	0.314729	0.0932959	0.0854574	1.06904	0.0753125	0.13846	2.25437	8.42913	0.173691	0.154588	0.0447196	0.175729	1.21302	0.431722	3.30893	0.0762328	1.5982	0	0.114256	0	1.62337	0.0722593	1.06896	0.0383901	0.802734
TCGA-91-6830	60	0	0	0.549205	1.82727	1.07767	1.53119	0.335484	5.22868	6.53683	0.130906	0.448618	0.499409	0.263458	1.53466	3.96585	0.282859	0.225403	0.472048	0.390943	0.861242	0.192515	2.30318	3.56193	0.259924	1.02476	0.741051	0.51834	0.507951	0.444692	7.97688	0.482468	0.251029	0.792785	2.19748	0	2.28186	1.49749	0.526489	0.587609	0.200854	0	0.330261	0.0347442	3.68689	1.63613	1.01386	0.776774	0.198885
TCGA-78-7154	593	1	0	1.16675	1.36377	0.255566	7.76546	0.534533	3.7169	33.9923	0.0834299	0.794989	0.0227349	0.0746264	0.108676	5.84497	0	0.17957	0.06017	2.49159	0.41167	0.163594	2.63742	1.37153	0.952529	0.423949	0.157431	0.775059	0.184989	0.19839	17.543	0.0768727	0.0533293	0.523638	0.549222	1.29493	1.66712	0.75556	0	0.0468125	2.90156	0.0359702	0.126291	0.221435	0.0854459	0.110931	0.092309	2.65211	0.126755
TCGA-50-6592	777	1	0.0875412	1.16	1.00548	0	1.62786	0.22776	1.16505	2.94236	0.426585	2.24042	0	0.0158988	0.231529	4.84635	0.998571	0.153026	1.487	0.47774	0.0584697	1.15015	1.6577	3.42577	0.317633	1.65994	0.26832	1.01781	0.3547	0.12076	12.0209	1.50672	0	1.49528	0.0468037	0.877794	2.35774	1.01664	0	0.0398928	0.181813	0.0306531	0.394617	0.0754811	1.23786	1.22894	0.603091	0.693091	0.432074
TCGA-55-A48X	689	0	0.615578	0.324251	0.654743	6.34224	0.757354	1.67121	0.0445242	0.237905	0.869474	0.239831	0	0.466637	2.66156	0	1.73784	1.12284	0.752482	0.908824	0.214514	0.255737	1.20641	0.788609	0.302123	1.40906	1.80475	0.569388	0.144592	3.60344	2.76105	1.44205	0.444622	1.1776	0.715472	0.184026	0.443593	0.455872	0	2.00023	0.163053	0.149947	0.219359	0.0230771	0.0890484	0.0924865	1.69955	2.10058	0.440331
TCGA-L9-A743	664	0	1.22884	0.334969	1.05582	3.13359	0.337793	0.665004	0	0.587114	0.439127	0.720752	0.195813	0.249958	1.56002	1.20942	0.51756	1.06545	0.0575819	1.31143	2.29812	0.821925	1.37049	1.71987	0.435962	1.61189	1.20528	1.38617	0.442581	0.569571	6.23571	1.25063	0.0510355	0.984646	1.73447	0.647778	6.21191	0.875285	0.214076	1.47837	0.408347	0.034423	0.0805725	0.233101	0.122656	0.679422	0.677262	0.236883	0.242606
TCGA-L9-A444	307	0	2.13104	0.052905	1.27152	0.0651845	0	2.18141	0	0.320238	0.680948	0.199212	0.0618533	3.65456	3.76976	0	0.306538	2.19845	0.409252	0.762606	0.186668	0.0556349	1.36366	0.321675	0	0	0.214156	1.91853	0.377467	3.00717	3.79878	0.313714	1.37835	0.874772	1.15803	0	2.55732	1.24418	0	0	0.0386966	0	0.572653	0.150611	0	0.392344	3.13924	4.90649	1.14952
TCGA-MN-A4N5	84	0	3.90654	0.424739	0.167347	0.236741	0.307742	2.25168	0.266618	9.04849	0.390491	0.88671	0.0886748	0.247411	10.8937	0.0616153	0.80861	6.41559	0.844871	0.923227	1.28454	0.669984	1.65709	1.18058	0.0646128	0.187702	0.245617	1.85346	0.0360765	0.198977	4.41269	3.35813	0.166404	1.21827	0.814028	0.0229578	0.774755	0.558375	0.218127	0.292139	0.255192	0.168357	0.394067	0.0172736	0	0.259605	6.19271	2.64813	0.263677
TCGA-95-7562	87	1	0.0334186	0.733824	0.88732	1.37181	0.378261	0.313008	0.0277971	0.134603	0.135706	0.494562	0	0	0.0707084	0	1.46616	0.233669	0.234893	2.22904	0.803543	0.2661	0.248471	0.400026	0.754478	0.00745505	0.204861	0.487747	0.180541	0.01844	10.3426	0	0	0.340698	0	1.37868	2.07706	0.103494	0	0.700532	0.360915	0.0234035	0.0547796	0.100851	0	0	0.220218	1.8636	1.67692
TCGA-86-A4D0	116	1	0.210719	0.70913	1.95578	0	1.26827	3.50871	5.10237	34.2092	0.456365	1.48769	0	0.40821	0.0495385	0	5.67012	0.130967	1.64566	1.02218	2.37696	0.149144	5.96221	1.55221	0.264295	0.323828	0.143526	2.14297	0.0843251	0.129191	16.3199	0.560663	0.145857	0.100503	0.0500712	11.725	0.67909	4.38673	0	0	1.16704	0	0.0383787	0	0.194747	0.0404533	2.44052	0.51581	0.308159
TCGA-05-4415	91	1	4.03771	0.0351416	0.0276916	0	0.187612	0	0.540449	19.5826	0.150771	0.157529	0	0.0505731	0.0490986	0.21411	1.22169	0.0324511	0.271841	0.112567	0	0.0739099	1.82238	0.0427339	0.0374211	0.134593	0.142251	0.103327	0	0.20487	19.6688	0	0.0963744	0.273928	0.421825	0.132962	0.192303	1.72474	0.101064	0	0.347002	0	0	0	0.193018	0.060141	0.0278028	0.383422	0
TCGA-55-8204	515	0	0.0203036	0.215231	0.157488	16.5174	0.476042	0.126779	0.0337764	0.191756	0.296815	0.0165398	0	0	0.128877	0	0.106892	0.0567865	0.856257	0.590949	0.0542438	0.776015	0.660445	0.112171	0.196451	0.208349	0	0.160722	0.182814	0.403317	9.56702	0.12155	0	0.261463	0.0217105	3.02474	3.72968	0.220072	0.13264	8.21612	0.0337346	0	0.299533	0.0525193	0.101329	0.0175402	0.973049	0.559129	1.23594
TCGA-55-1596	2065	0	0	4.46919	0.862089	1.30015	7.3071	0.895787	1.78991	7.24129	0	0.976661	0	0	0.195131	7.94203	0.80922	0	0.504174	2.38599	0.492779	0.195825	1.09997	1.69836	0.198295	0.713211	0	0.593159	0.0553591	0.0678507	7.88548	0.460091	0	0.296908	0	5.14336	0.679345	0	4.28434	0.336213	1.90687	0	0.100782	0	1.68763	0.132787	0.036832	2.96299	0.354034
TCGA-78-7160	678	0	1.05901	0.0458214	0.343019	0.282284	0.293555	0.125956	0.201342	39.6037	0.294887	0.0246485	0.0267858	0.351694	3.39306	1.11672	1.27438	0.169253	1.77228	1.02744	0	0.144558	1.50447	1.67163	0.243968	0.337493	5.00803	0.748493	0.435903	0.333915	7.76138	0.905701	0.251327	0.454588	0.970626	1.00555	1.42089	0.515372	4.2828	0.0551537	0.452458	0.0423794	0.0495979	0	4.12751	0.653486	0.217514	0.624934	0.746704
TCGA-55-A57B	546	0	0.0929508	0.197068	0.299488	0.242809	2.16432	0.270854	0.030926	9.3932	0.513338	0.040384	0	0.24309	0.118001	0.114352	2.77303	2.57372	0.566221	1.75851	0	0.177632	0.492408	0.924344	1.25911	0.0663537	0.22792	1.40721	0.167386	0.369282	2.22879	1.39115	0.115811	0.631746	0.397567	0.340859	2.33654	0.316644	0	0.0677727	0.164735	0.650947	0.152364	0.0320582	0.0927781	0.497861	1.09139	0.691125	1.37632
TCGA-69-7974	184	0	5.49365	0.227931	1.06868	3.58533	0.803133	0.469909	0	0.413905	0.464508	1.45906	0.306456	0.393625	0.22292	0	0.528264	1.87327	0.28211	0.766627	2.69415	0.119846	0.762362	1.16414	0.412617	0.214887	0.276796	1.16166	0.108416	0.913551	15.2333	0.270316	0	0.786062	1.93129	0.206977	1.68384	0.582644	0.0983265	1.31689	0.183389	0.021081	0.197373	0	0.100154	0.481098	0.126232	2.67342	0.247624
TCGA-55-8513	791	0	0.224507	1.07663	0.33489	24.5524	1.96638	0.54517	0	1.49672	0.668565	0.060963	0.0662493	0.733931	0.712532	0	0.656647	0.418613	1.49035	0.272268	0	0.059589	0.73029	1.58487	0.181022	0.400666	0	0.240662	0.336912	0.619402	1.1476	0.560017	0.233102	0.361392	10.6029	0.557435	0.361764	0.289697	0.0814818	6.41134	0.207234	0	0.12267	0	0.497978	0.226277	2.1519	0.515216	0.0615607
TCGA-95-A4VN	553	0	1.98735	0.179144	0.931691	2.22195	0.40169	0.39395	0.196792	0.26945	0.461157	0.0385463	0.0209444	0.0343747	3.10363	0	0.0830384	1.78662	0.498882	1.20507	9.48125	1.35639	3.68305	1.91706	0.0763055	1.0978	0.725164	1.46316	0.170421	0.391642	14.5123	2.90357	0	0.609346	0.430073	0.135562	1.89527	0.47625	0.15456	0.991894	0.32758	0.0331374	0.387817	0.244795	0	0.40878	1.36063	4.07207	0.0778485
TCGA-50-5068	1499	1	0.116659	0.706663	0.951286	8.27149	0.628783	0.728438	0	0.0540086	0	0.179507	0.0344245	0	1.89237	0	1.70604	2.99089	0.182215	2.26362	0	1.30047	0.813157	0	1.25417	0	1.66864	0.442494	0.350132	0.343311	2.81895	0.116398	0	0.153011	22.7031	0.311936	1.34271	0.842982	0	2.90617	0.0646098	0	0.31871	0.100587	0	0.134375	0.559087	6.31811	0.895669
TCGA-05-4420	912	0	1.59765	1.20972	1.31641	0.0867492	0.317795	0.976487	0	6.31874	0.123576	0.657627	0.0112249	0.00921134	0.0536566	2.37887	3.13749	0.0709273	1.21802	0.676597	0	0.222121	1.52019	0.0700517	17.728	0.48652	0.155457	0.953539	0.228337	0.307847	11.313	0.379544	3.50193	0.376465	0.135584	4.21386	0.805594	1.2173	0.0276116	0.0462255	3.23035	0	0.415691	0.142128	0.147655	0	0.227879	6.52968	0.0625829
TCGA-50-6595	189	1	0.196758	0.546271	0.978322	1.42771	1.034	0	0	0.883587	0.106532	0.988414	0.0580606	0	0.277538	0	0.0575483	0.0917177	0.0768316	0.715845	0	1.20114	0.259057	0.724683	0.158647	0.0292619	0	0.194691	0.236215	0.0723789	14.5377	0	0.0680967	0.187688	0	0.225477	6.06922	0.25389	0	0.239101	0.127133	0	0.053754	1.30066	0	0.141649	0.11787	0.361227	1.5646
TCGA-05-5428	670	0	3.98091	0.157268	0.475055	0.193771	0	0.86461	0.575871	0.519249	0.0562284	0.761387	0	0.0251476	3.95513	0.106467	0.303744	2.03319	0.243313	5.45751	0	0.992302	1.75339	0.254995	0	0.556006	2.12205	0.34253	0.0623378	0.573031	5.40494	0.207237	0	0.222891	0.0740308	0.119009	10.1839	0.107204	0.0753817	0.126199	0.421783	0	0.17023	0.0298477	0	0.0598106	0.0414751	3.28884	2.16418
TCGA-67-6215	174	0	11.5375	0.189686	0.589587	0.0605924	0.225042	0.782125	0	8.11461	0.203457	0.026454	0.0246411	1.29414	2.82691	1.15572	1.56311	2.84154	0.91301	0.5401	0	0.199474	1.37754	0.999561	1.12217	0.0062094	0.0853155	0.240996	0.050125	0.368613	4.26843	0.124977	0	1.16993	0.565508	0.526313	0.307557	0.129302	0.454601	0.0253688	0.154159	0	0.182506	0.0360002	0.138915	0.685324	2.051	1.16895	0.16028
TCGA-55-6984	760	1	3.87971	2.14149	0.043269	2.34537	1.20192	0.0754692	0	4.09928	0.294481	0.0196916	0	0.0263407	0.153436	0	0.0636309	0.101412	1.44419	0.615616	0	0.288717	1.34794	3.60575	0.818603	0.0808868	0	0.304964	0.0652953	0.120044	4.34712	0	0	0.415051	0.930517	0	0.500799	0.33687	0	0.594839	0.0602446	0	0.237742	0.0625275	3.67948	0.0313241	0.564756	0.0499258	0.29827
TCGA-78-7542	321	1	0.113736	0.6459	0.0593798	0.274115	0.517245	0.118365	0	10.1336	0.323302	0.83001	0	0.0206562	1.50405	2.14257	0.0748485	0.0596449	0.632881	0.551729	0.113948	1.13205	0.726722	0.575994	0.137559	0.526476	0	0.386862	1.07529	0.329481	22.1584	0.468116	0	0.152569	0.152022	0.374722	0.687266	0.440285	0.897817	0.233235	0.188974	0.0398255	0.186436	0.281944	0.047302	0.221078	0.170338	0.567697	0.0233901
TCGA-55-6712	171	1	0	0.789715	1.84466	0.903511	1.26483	0.310114	0.12393	1.27265	0.0605032	0.0404578	0.494618	0.676486	5.83205	0	0.196101	0.572984	0.261811	1.08414	0.0995142	0.652508	0.74429	0.480166	0.120134	1.1467	0.456675	2.37728	0.603693	0.123319	5.9197	0	0.54144	0.413051	0.358465	0.170741	2.16075	0.807477	0	0.20369	0.185665	0.052171	0	0.0642336	0.0619652	1.22279	0.312397	4.05176	0.36769
TCGA-44-6148	362	0	0.0848959	1.07137	0.641625	12.6196	0.823652	0.412305	0.0941535	0.330151	0.0919321	0.030737	0	0.0822315	0.239502	0	0.546275	0	0.530414	1.30412	0.0756039	0.0450664	0.762712	0.364796	0.273809	0.151509	0.173475	0.308016	0.815365	0.187378	0.946815	0.0847067	0.058764	0.354299	0.0907788	0	0.351768	0.175275	0	13.7727	0.0470185	0.0396358	0.046387	0	0	0.366708	0.915444	0.935162	0
TCGA-93-A4JQ	526	0	6.71514	0.918516	1.31833	0.660164	0.84064	0.6763	0.468465	0.330943	0.31667	0.317631	0	0.0629456	1.19165	1.79882	0.494185	1.36317	0.406016	1.10334	1.38894	1.79384	3.9157	1.11696	0.279456	2.60945	0.929526	0.310796	0.507111	2.41444	11.7169	2.13973	0.0899641	1.14681	0.324279	0.297884	9.75347	0.805007	6.88696	0.671249	0.0959765	0.12136	0.390586	0.354873	0.216215	0.224563	3.76326	0.77549	3.74203
TCGA-86-7953	591	0	2.45891	0.861272	0.858334	0.488974	0.0135239	0.417794	0.111308	8.24285	0.461898	0	0.0148081	0	1.34491	0.0514465	0.146774	0.0701763	1.25411	0.689718	0.312826	0.452858	0.78508	0.985741	1.24083	0.328376	0.410163	0.306205	0.12049	0.498416	20.2411	0.40056	0.798913	0.4009	0.107319	2.68365	2.37964	0.181309	0	0.152454	0.250133	0.0234287	0.38387	5.69703	0	0.534676	0.781615	1.3589	0.302721
TCGA-91-6831	310	0	0	0.274867	0.45485	0.0451554	0.0586979	0.528895	0.060389	0.332758	0.530678	0.483002	0.0321358	0	0.307227	0.446588	6.75268	0.0507645	0.510303	1.14461	1.26078	0.578101	2.53032	0.133701	0	0.890783	0	0.197558	0.78445	0.120182	15.8904	0.10866	0.301525	1.46734	0.0388164	4.45116	8.47329	0.224839	0.0790494	0	0.301571	0.101688	0.238017	0	0.060389	0	1.21781	1.89937	1.19446
TCGA-38-4625	2973	0	2.12091	0.295145	0.608797	0.0142608	0.658089	0.214757	0.114431	0.14012	0.316571	0.772038	0.020298	0.349794	1.98906	0	0.563329	0.14429	0.161162	2.1133	0.0612575	1.46059	1.96582	2.25903	0.0554629	0.0102299	0.140557	0.243896	0.227097	0.075911	14.416	1.26971	0	0.360886	0.30647	0.0919647	0.934224	0.940854	0.024965	0.0208974	0.146036	0	0.300678	0	0.0190718	0.495204	0.274716	2.09948	0.113169
TCGA-62-8397	1289	0	1.07124	0.270379	0.603666	0	0.0481162	2.10581	0.297015	0.115721	0.193338	0.129283	0.0526851	4.02079	0	0	0.10444	0.166452	0.278872	0.577394	0	0	0.304211	0.438392	0.287917	0.106211	0	0.176665	0	0.722455	0.663734	0	2.59526	0.234177	0.5091	0	0.575389	0.55292	0.129598	0	1.38435	0	0.195108	0	0	0.82262	3.42263	3.60561	0.979129
TCGA-49-6745	522	0	3.43279	1.16386	0.351562	0.78073	1.15986	0.0533209	0	2.18463	0.124835	0.0834756	9.13944	0.241935	0.650439	0	0	0.895624	0	0.994167	5.47534	0.448768	1.08331	0.75483	0.123935	0.0571485	0.157041	0.51965	0.738124	0.113085	10.1426	0.0766822	0.0531972	0.229096	0.219144	0.0293572	4.84743	0.674352	0	0.233482	1.60326	0.0717621	0.209963	0.397595	0	2.21313	0.0920802	1.16404	2.40238
TCGA-97-8175	551	0	7.30836	0.306725	1.80267	0	0.859702	0.0702614	0.168471	1.01739	0.246744	1.09538	0.776975	0	0.35712	0	0.20734	0.377655	0.197725	0.491258	3.83291	4.19318	0.352948	0.590571	0.762114	0.0225915	0.310401	0.325673	0.0911843	0.689185	4.84716	0.101045	0	0.501125	0.198528	0.174079	1.32879	1.20222	0.220528	0	0.383264	0.0709211	0.166002	3.49276	0.224627	1.42896	0.728009	1.04581	0.166612
TCGA-05-4433	730	0	0.279294	5.70993	0.416613	0.542842	2.56855	0	0.116156	10.5026	0.623786	0.331799	3.12151	0.228258	0.147735	0.107375	0	0.0976438	0.899754	0.508065	0	0.0555979	0.973396	4.82191	0.337795	0.358254	0.214014	0.155453	0.251477	0.0770555	5.25634	0.104502	0	0.337187	0.447971	0.400077	0.0964383	0.216235	0.152049	0.190912	0.232025	0	0	0.0602043	1.91658	1.17625	0.418287	0.192283	0.0574375
TCGA-44-6775	370	0	0.0335247	0.101539	0.52008	0.354467	0.352358	0.76756	0.0557707	0.251435	1.79701	0.00910334	6.02467	0.0243544	1.13493	0	2.5298	0.187529	0.235638	0.569193	0	2.13556	0.794515	1.91387	1.78406	1.22651	0.205511	0.464417	1.20743	0.665947	7.75821	0	0.974628	0.875435	0.0716956	0.461018	18.614	0.571022	0.146008	0.183328	1.57821	2.44169	1.04412	0.462499	0.167312	3.79402	1.04434	1.66179	2.37169
TCGA-NJ-A7XG	617	0	10.3462	0.199595	0.825722	0.0273246	0.78143	1.00586	0	8.18254	0.214084	0.0178945	0.0972308	3.38306	0.0464777	0	6.5919	0.645096	1.69838	2.93036	0	0	2.66421	0.606792	1.52321	0.0294019	0	1.1846	0	0.581802	0.673709	1.70957	0	0.825062	0.328842	0.679669	0.0606792	0.238098	1.53071	0.0800817	0.109493	0	0.216045	0.132582	0.182714	0.0189769	2.84242	1.78453	0
TCGA-38-4632	1357	1	3.48002	0.343701	2.48267	1.38806	1.74319	0.472389	0.125853	0.231161	0	0.493028	2.61192	0.0274794	0.480207	1.5124	1.19487	1.21665	0	3.76162	3.84022	0.843352	1.16013	0.417958	0	0.725696	0.695642	1.14159	0.408707	0.29221	10.863	0	0	0.148841	1.17298	0.56352	4.38856	0.468575	2.38876	0.137901	1.17318	0	0.496038	0.652304	0	3.72531	0.0453207	3.28129	0.248931
TCGA-93-7347	297	0	5.9219	0.31822	0.740875	0.879212	0.185335	0.119282	0.603801	2.27643	0.372351	0.134868	0.862466	0.249795	1.81884	0	0.134095	1.84328	0.134271	0.231668	0.0510362	0.243375	0.577005	0.562868	5.76065	0.127845	0.819725	0.463106	0.206404	0.337304	2.18374	0.457448	0	0.252835	10.9487	0.437826	1.92606	0.147899	0.0831976	0.417852	0.243338	0	0.219194	0.774147	0.222453	0.907665	1.23594	1.23625	3.83428
TCGA-44-2661	446	0	0.106856	0.161821	0.522811	4.18699	0.708415	0.22241	0.106657	0.18403	0.104141	0.121866	0.113515	0.745216	0.67827	0	0.225026	1.22534	0.150214	0.259176	0	0	0.814347	0.157426	0.275708	0.01907	0.655042	0.116307	0.346368	0.212263	2.38345	0.127941	0.0443787	0.206409	2.51373	0.514304	1.712	0.132368	0.139615	1.20762	0.662824	0.029933	0.0350315	0.018427	0.106657	3.12017	2.35569	0.971074	1.47673
TCGA-86-8076	489	0	1.07938	0.114708	0.338963	11.2477	0.19903	0.236486	0.0315021	1.37289	0.27683	0.0462783	0.13411	0.247619	6.33051	1.80547	1.03018	0.052963	1.10917	0.872669	0	0.120627	3.09748	0.244109	0.0916116	0.481577	0.34825	0.936879	0.170505	0.250774	2.21752	0.170048	2.35937	0.541907	0.870693	0.911424	1.20311	0.205254	0	5.03957	0.073414	0	0.124162	0	0.315021	0.147233	1.70162	0.912593	0.186928
TCGA-4B-A93V	254	0	1.37823	0.102647	0.552722	0.154578	0.018267	0.658376	0.714144	4.87024	0.477096	0.69941	0	0	1.8644	1.94572	4.08396	0.0315962	2.32918	3.01405	0.0603628	0.287851	1.64838	0.0832162	0.0728704	4.35479	0.138504	2.34744	0.0813744	0.0748023	2.89779	0.608675	5.48937	0.961776	0	5.20426	2.43407	1.01458	0.0492008	0.164738	0.475507	0.221519	0.407394	0.0194813	0.075173	0	1.86785	1.15107	0.260204
TCGA-L9-A7SV	565	0	0.0196294	0.237812	1.13609	0.134296	0.0793512	3.88138	0.13062	0.0327157	2.16814	0.580992	0.086886	0.17112	0.0415327	1.7508	1.24012	4.22738	4.69102	5.61806	0.157329	0	5.46388	0.0722977	0.189928	1.19983	0.120331	1.0003	0.106046	9.24992	5.85612	0.763841	0.570666	1.20774	0.545731	0.269936	0.352451	0.0911852	0.0427454	0.0715615	0.065229	0.137467	0.804412	0.0677008	0	0.135663	0.141111	8.24361	0.0322948
TCGA-73-4670	131	0	0.318819	0.339758	0.401594	0.190948	3.68505	0	0.275011	9.7909	0.0575405	0.0320639	0.0313598	0.00857814	0.149904	5.01175	0.683829	0.0165129	2.51757	1.34609	0	2.14374	0.751741	1.36996	0.171377	1.12742	0.217156	0.660152	0.297698	0.0130312	9.67935	0.424144	0	0.198525	0.0505055	2.93638	7.77942	0.603379	0.231422	0.10762	0.346608	0	0.522607	0.0203627	0.667883	0.010201	0.113181	0.227624	1.41817
TCGA-97-8547	657	0	5.68684	1.00011	1.77319	0	1.86877	2.06185	0	5.81933	0.774737	0.109589	1.65646	0.826253	2.1736	0	0.257544	2.51408	0	0.711911	1.27427	3.15515	0.664922	0.675657	5.91656	0.0491081	0	0.580863	0.396421	1.41713	4.29642	1.64734	1.14282	0.839953	0.0392317	0.0840894	8.51327	1.24985	4.87361	0.133755	0.101599	0.205552	0.0601409	0.0949044	0.183106	3.1062	4.48376	5.65805	5.91547
TCGA-05-4403	578	0	0.365296	1.57316	0.408675	1.5265	6.59898	0.0475204	0.0189905	3.70687	0.0741697	0.0681952	1.11163	0.514161	0.193227	0	0.0200331	0.0319277	0.133729	0.581448	0	0.799898	0.122008	1.30339	0.0736352	0.0254658	0.279915	0.0508303	0.0205571	0.0251958	1.30496	0.0683403	0	0.114338	1.29389	0.0523272	1.04061	0.123734	0.0497172	0.332933	0.0948349	0	0.0187122	0.00984285	2.48775	0.719915	0.0957405	0.251492	0.112686
TCGA-55-1592	701	1	0.0144288	1.22364	0.671515	0.00897411	0.793257	2.76294	0.432059	0.112224	0.187495	1.49276	0.600342	0.440241	0.824282	1.15381	0.405137	0.383377	2.23117	0.839919	0	0.344673	0.992334	1.32858	0.721309	0.901259	0	0.385485	0.285817	0.63693	4.22412	0.518278	0.0299623	0.64001	1.09543	1.68656	2.55086	0.156395	0.157102	0.0526018	0.151832	0	0.0473031	0.062205	0.0240033	0.698041	0.449475	1.01323	0.545986
TCGA-67-3770	610	0	0.606842	0.980258	1.15867	0.553566	2.38772	1.43149	0.0673016	2.13519	0.197141	0.109855	0.214886	2.08668	1.96877	0	0.0709966	0.905207	0.379144	1.07938	0.648506	0.0644275	0.206797	0.149005	1.631	0.01805	0.248002	0.240187	0.218561	0.178586	1.35358	0.121098	0.42005	0.202604	3.67706	0.185446	1.17342	0.125288	1.32147	0.221232	0.627371	0	0.198946	0.0348827	0	3.46006	1.3572	6.35037	0.865271
TCGA-64-1677	628	1	4.36929	0	2.78081	0.0301947	2.04102	0.505234	0	0.377593	0.236571	0.606403	0	0.105804	0.205438	2.68764	0.681571	0.0678908	0.454975	4.00354	5.83658	0.23194	5.03083	0.178807	0.704597	0.389881	1.19041	0.480377	0.0874248	0.750064	4.19612	0.290636	0	0.816209	2.38794	1.05705	0.536421	1.42829	0	0.0884931	0.349537	0	0.079579	2.46971	0	0	2.38481	2.13908	0.239615
TCGA-55-8505	440	0	0.568732	0.770617	0.785848	0.167555	0.62922	0.124606	2.39021	11.5243	0.388969	0.073153	0	0	0.31667	1.74919	7.09154	0	2.10395	1.23424	0	1.81144	1.64136	3.74843	0.0482707	0.227036	0	0.932994	0.323424	0.0991008	5.50828	0.0895995	0	0.235566	0	0.82326	6.73891	1.2051	0.0651831	0	0.26525	0	0.343465	0	3.83429	0.155156	0.824867	0.865531	2.95481
TCGA-49-4505	428	1	1.60412	0.136038	0.604904	1.30898	0.549894	0.160263	0.0426971	2.14239	0.0833794	0.0243928	0.113605	0.307648	0.65166	0	0.0675618	1.27417	0.721603	1.71193	0.274281	0.71529	0.274317	0.118164	0.434587	0.337809	0.0786679	0.190473	0.254207	0.283243	1.35966	0.153652	0.053297	0.275432	0.109778	0.264711	2.96	0.476907	0.335343	0.280705	0.0923958	0.089871	0.0210357	0.0553252	0	0.731703	0.615021	1.99671	1.05565
TCGA-55-A48Y	630	0	0.0256772	0	1.28694	0	0.643554	0.213778	1.23876	2.27529	0.291956	1.60366	0.0454621	0	1.84718	3.31686	0.45061	0.071816	0.36096	0.249118	0	0.286242	1.58696	1.3713	3.97511	0.378054	0.787024	0.838449	0.231198	0.0850103	2.72051	0	0.906448	0.376589	0.0823696	0.264827	4.96506	0.636155	0.11183	0.140414	0.654165	0	0.0841799	0.0221398	0.0854316	0	0.922936	1.591	2.28121
TCGA-55-8511	552	0	1.24543	0.0898122	0.743106	0.719278	0.095897	1.29612	0	4.59623	0.674325	0	0	0.0215418	2.32142	0.273603	0.676497	0.704956	0.903177	0.575382	0	0.661126	1.37796	0.436864	0.765103	0.330752	0.363555	1.7605	0.373796	0.425417	4.62995	3.10663	0	0.625832	0.951237	3.05833	3.80891	0.780574	0.193719	0.432416	0.180653	0	0.243036	0.997149	0.0986599	0.0768519	0.532922	1.26573	2.92715
TCGA-MP-A4SW	1778	1	3.67576	1.40016	2.75832	0.617127	0.820441	3.47333	0.600233	5.6314	0.476183	0.269431	0.119779	0.262115	3.05367	0.832282	2.69105	3.81582	0.422677	1.14862	1.50618	0.2873	1.18414	1.4535	7.74585	0.714348	0.414716	0.93718	0.0812187	1.74205	4.27549	1.41752	0.515107	0.556601	1.39857	1.13706	1.43273	0.558695	3.63389	0.36995	0.499575	0.031585	0.406614	0.0388879	0.112544	1.32474	3.24222	5.93065	1.85504
TCGA-49-AARE	1229	1	0	0.700423	0.752636	2.26209	1.07082	3.45687	2.76293	0.280311	0.443932	0	0.0558335	0.0305453	0.044482	0.905232	1.2175	0.0293998	0.197025	1.52975	0.224667	0.736566	1.70965	1.20019	0.305123	0.797284	3.09302	5.08622	0	0.649624	5.27549	3.46112	0	0.601628	0.0899207	4.69795	4.6459	4.1994	0.183123	0.689789	0.652036	0.0294459	0.551382	0.0543812	0	0.108972	3.24933	2.51844	3.7701
TCGA-64-1681	1167	1	0.0356392	0.0809571	0.659207	11.5264	0.691536	0.222538	0	0.0692985	0.0868342	0.358068	0.03155	4.50495	1.43273	0.219224	0.56289	0.897106	0.375751	0.475431	0	0.0567564	0.281542	0.0656319	0.747139	0.19081	0.436946	0.0528973	0.738061	0.66862	2.4842	0.0533396	0.0740072	0.682052	0.857449	0.89851	0.836806	0.193148	0.232825	2.6635	0.0789532	0.17471	0.175259	0.0921881	0.0592883	0.985238	0.170801	2.13465	0.644978
TCGA-50-5055	1830	1	0.506884	0.255872	0.302441	7.85527	0.443963	0.263757	0	0.434137	0.0686119	0.02294	0.224363	0.490976	0	0.129914	0.222383	0.118141	0.296899	0.409812	0	1.0763	0.549607	0.0777883	0.817408	0.018846	3.88409	0.0208984	0.380333	0.186462	2.70878	0	0	0.0302199	0.858181	0.338842	6.82593	0.19622	0	2.92586	0.257337	0	0.346201	0.364211	0.0702698	1.93405	0.253046	0.581617	4.79514
TCGA-MP-A4T4	2617	1	1.39027	0.272923	3.3642	2.06566	0.47875	0.910981	0.171319	3.7975	0.66911	1.17449	0.113959	0.187033	0.381317	0	0.0903626	2.8443	0.482565	2.93495	0.894185	0.164003	1.80655	0.94825	0.124554	0.850021	0.31565	1.29924	0.880899	0.653486	7.10656	3.15967	0.427702	1.36302	0.963544	0.737595	5.65394	0.757451	1.738	0.328508	0.513322	0.108181	0.54863	0.288586	0.0856597	0.37811	3.02297	4.28944	1.60958
TCGA-78-7220	807	1	0.148572	0.562486	0.0590985	0.0770046	1.7217	0.103079	1.44176	7.2016	0.361992	0.81359	0.284971	0.0719543	0.0523923	4.8741	0.434548	0.069256	2.26261	0.840832	0	0.0788681	1.7145	2.73604	0.0798628	2.34214	0	0.477786	0.0891828	0.218613	14.0152	0.0741202	0	0.584607	0.105911	1.47557	0.718211	0.345082	0.970596	0	0.37028	0	0.121769	0.0213506	16.4773	0.0855673	0.326347	0.340953	0.203694
TCGA-69-8253	426	0	7.477	0.296414	0.210217	0.105506	0.316497	0.217279	0.607815	17.6486	0.296737	0.0956692	0.06931	0.293864	1.32525	0	0.228995	0.145984	1.0089	1.64578	0	0.166245	1.4371	0.0961212	0.084171	0.320204	3.6796	0.510016	0.0939938	0.446413	1.237	0.54683	0.704517	0.256727	0.669748	0.508421	0.180227	0.464724	0.397816	0.118928	0.852778	0.0182766	0.256675	0	0.93343	0.360733	0.625367	0.808527	0.171746
TCGA-86-A4P7	415	0	0	0.383459	1.78278	1.77961	0.655102	1.15947	0	0.492356	1.39841	0.646319	0.80697	0.515055	1.87514	0.155755	0.933159	0.885251	0.593257	1.78106	0	0.241948	1.10606	0.93261	0.0816664	0.0903785	0.465666	0.776711	0.227992	1.20158	3.81237	0.454764	0.368067	2.25537	1.75993	0.551327	0.804376	0.313667	3.1981	0.553868	0.252428	0.0709309	0.622594	0.0218328	0.379111	0.896872	1.94163	2.92868	0.416589
TCGA-05-4396	303	1	0	0.714914	0.938921	0.0978722	0.0636125	0	0	6.30537	0.191703	0	0	0.457267	0.582664	0.967959	12.2888	0.220059	1.01389	0.286256	0	0	0.694684	2.02853	0.126881	1.40417	0	1.55708	0	0.043415	3.29061	0.117758	6.45372	0.408104	0.0420663	2.0738	0.163007	0	0	0	0.326821	0	0.257945	0	0.261781	0	3.53509	0.325011	0
TCGA-97-7547	1965	0	0.804561	0.980673	0.0819605	0.036615	0.0793269	0.0408441	0.0326449	3.64669	0.0956242	0.0106571	0.0521156	0	5.3976	0	0.895367	0.329306	0.597693	1.1899	0	0.281257	1.94232	0.97572	0.094935	1.14693	0.481177	0.29126	0.141352	0.433119	1.03955	0	0	0.343959	0	0.764585	0.0271033	0	0.128197	0.107309	0.11955	0	0.193	0.06768	0.13058	0	0.611295	0.378279	0.225994
TCGA-05-4430	761	0	0.156904	0.142568	0.496184	7.22152	0.672336	0.228606	0	2.98554	0.0509725	0.835077	0.583386	0.0797894	0.730365	1.2547	0.275352	0.373015	0.183808	1.17976	0.670707	0.424786	0.298941	0.144475	0.177118	0.259017	0	0.163019	0.508597	0.363627	2.36236	0.234832	0.0651644	0.763325	2.11399	0.485479	8.14837	0.0971829	0.615019	1.91625	0.0955893	0	0.180038	0.0270577	0.156613	0.745523	0.131594	1.33948	2.06514
TCGA-55-7283	609	0	6.43689	0.0370643	1.66478	0.806786	0.474905	0.152826	0	4.37148	0.15902	0.21267	0.0433333	1.22682	1.86426	0	0.515412	0.479172	0.114686	1.1279	0	0.0389769	2.01308	0.721152	0.631496	0.0218395	0	1.02926	0.264447	0.243089	4.43559	0.146522	0.101647	0.22763	1.02066	0.280474	0.236628	0	0	0.223065	0.135551	0.0685603	0.240714	0.0422062	0.65145	0.570883	0.234592	0.5729	0
TCGA-05-4382	607	0	0.0122731	0.390309	3.50037	0	1.46856	0.613084	0.102086	0.385239	0.279096	1.1231	0.152109	0.0178318	1.97356	2.83104	0.55999	0.171632	1.06394	0.386985	0.0327893	2.48224	0.536104	0.723254	10.074	1.37442	0.225707	0.0425047	0.751449	0.352152	7.66514	0.0367372	0.662633	0.355611	0.0393707	0.267227	7.67892	1.3683	0.0534522	0.0671146	0.129148	0.03438	0.10059	0.0423292	0.0816686	0.954245	0.852873	2.17998	3.2509
TCGA-53-A4EZ	1071	0	0	0.757562	2.97285	0	0.35591	0.999559	5.3926	10.9665	0.552539	1.42357	0	0	0.0423375	0	2.10691	0.447719	1.50021	2.57226	0.481131	0.159331	2.78953	1.51082	0	0.366032	0.245326	1.37607	0	0.596223	5.57905	0.119791	4.61223	0.350731	0	1.9491	0.884383	4.80252	0	0	11.8801	0.0560525	0.721598	0.0517594	0.0665753	0.0691458	5.22638	1.4327	0.62549
TCGA-86-8674	405	0	0.0574078	0	0.907714	0.0178527	0.0232069	0.477954	2.24429	2.09698	0.186497	0.179269	0	0.104261	4.0691	5.29691	7.50551	0.0401406	2.01754	0.974689	0	0.137135	1.52059	0.2643	0.138865	0	0.175959	1.07929	0	0	1.92075	0.257759	0.238422	0.297766	0.0613859	1.15128	0.673966	0.0888928	0.687567	0	1.01743	0.0402035	0.0470513	0	0	0.0495946	1.68515	1.30426	1.22783
TCGA-35-4122	225	0	1.16217	0.55578	0.778586	0.0253622	1.30226	0.16975	0	0.317161	0	0.088583	2.20205	0.0444353	0.258838	2.50833	0.107342	0.883892	0.19108	0.840699	1.7431	3.70157	0.549527	0.488118	0.0986384	0.33658	0.124987	0.141224	0.403882	0.112504	5.51422	0.122061	0.042339	0.116695	1.76595	0.116825	5.35052	0.505138	0.221996	0	0.429101	0	0.434479	1.4064	0.169592	2.95915	0.048857	0.645702	1.40886
TCGA-78-7633	994	0	0	0.020048	0.418641	0	0.321093	0.165326	1.40947	9.62724	0.0430067	0.115032	0	1.79841	6.02221	0.977183	0.0696961	0.573904	0.527282	0.545859	0	0	1.13808	0.536345	0.12809	0.519768	0.568071	0.255437	0.0715192	0.102267	2.65757	0.158506	0.0274904	0.113653	9.07382	0.0303415	0.109707	0.245986	0	0	0.190629	0	0.108501	0	0.0220229	0.114366	0.222057	0.82027	0.0435601
TCGA-99-8033	656	1	0.0598343	0.090612	0.553367	0	1.74152	2.2417	8.0875	13.7951	0.801817	1.19419	0.052969	0	8.41888	2.71439	0.682521	0.188268	2.3131	1.34242	0.239784	0.524082	4.66422	2.56189	0.289469	0.447154	0.916981	0.954694	0.242437	1.08952	11.386	0.71641	2.29862	0.246141	0.223932	0.531403	5.84688	2.10779	0.130296	0.0272666	1.64035	0	0.14712	0	0.223961	0.0516908	0.609356	3.00713	0.147661
TCGA-38-7271	800	1	0.226846	0.0572552	0.225585	0.141089	0	0.0786926	0	0.955692	0	0.0102663	0	0.357055	1.27992	0	0.331743	0.634459	0.0885806	0.641909	0.101008	0.180629	0.368948	0.13925	0.243876	0.0506049	2.31766	0.205758	0.0680841	0.125171	2.95158	0	0	0.256962	0.889405	0	0.313313	0.0585429	0.164661	0.137832	0.0628177	0.105909	0.123948	0	0.0628955	0.391944	0.0905965	0.728814	0.622018
TCGA-64-1680	1126	0	10.3007	0.0981079	0.869727	6.7491	1.23087	0.269683	0	7.09026	0.157845	0	0	2.02372	0.479755	0	0.341069	1.08716	0	1.96415	0	0	0.707462	0.119304	0.731302	0.0144521	0.198568	0.288467	0	0.107241	1.44503	0.0969595	0.201793	0.324439	0.484913	0.371202	0.402651	0.200629	0.916987	1.65325	0.269099	0.0453692	0.212388	0.474803	0	0.0279835	0.931435	0.981231	0
TCGA-97-8179	435	0	0	0.532512	0.752847	0.167244	0.0334465	1.11937	0.894662	19.5124	0.335982	0.202201	0.274668	0.105185	9.19067	0.127235	0.362993	0.520668	0.726936	2.65899	0.221046	0.461169	1.02848	0.495194	0.200136	3.21156	6.72034	0.22514	0.59598	0.456538	3.74866	2.60044	5.79862	0.325562	0.154825	1.68297	0.628515	0.480432	0	0.226223	0.927922	0.0579425	0.712024	0	0	1.60824	1.04087	4.41455	0.680611
TCGA-38-4626	2595	0	0.207415	0.0942318	0.272267	0.258008	0.0670773	0	0	0.322646	0.151609	0.0450574	0.0734467	1.5972	1.11909	0.159482	0.382193	1.23274	0.388768	0.402464	0.138535	0.379861	0.790353	0.0954921	0.150516	0.0925407	0.127148	0.184713	0.26146	0.194564	2.31323	0.186257	0.129213	0.278232	7.06395	0.0356536	1.27482	0.144527	0.0225835	0.207943	0.361853	0	0.220996	0.0178841	0.0517574	0.38525	0.844932	0.699707	0.15356
TCGA-78-7163	6812	0	2.2881	0.433132	0.479965	0.155652	1.53196	0.148826	0.327114	5.43225	0.203252	0.014562	0	0	0.49169	0	0.0313703	0	0.125645	0.433573	0	0.0284677	0.515019	0	0.749495	0.526382	0	0.229944	0.0321908	0.295909	0.697768	0	0.296962	0.249382	0.0573435	2.66306	0.0246896	1.05183	0.700679	0.162921	1.05933	0.0500746	0.351623	0.601112	0	0.231643	3.25545	1.94447	0
TCGA-44-6779	500	1	1.54842	0.380254	0.19976	0	3.28196	0	0.835427	2.35983	0.0679764	0.0795464	0	0.0304018	0.619822	1.93067	0.0734411	0	1.07855	0.50752	0	0.599813	0.213917	2.54324	0.134973	0.410772	0.256541	2.02907	0.376811	0.0461837	15.1687	0	0.0869025	0.19461	0	0.815281	2.65884	0.064801	0.0911313	0	0.0463552	0.058615	0.205797	0.0721676	0	0	0.0501405	0.57623	2.06553
TCGA-86-8585	353	0	0	0.104169	2.13422	0.598954	1.2513	0.501102	0.114431	0.114644	0.670388	1.74643	0.121788	0.224868	1.67372	2.53872	0.663925	0.0961937	2.57859	1.16788	0	1.3693	1.40645	0.316687	0.221852	1.19691	0.843342	1.36128	0.247742	0.303645	4.69881	0.205899	0	3.05113	0.294212	2.12833	2.66017	0.852096	0.748953	0	0.666689	0.0481721	0.169132	0	0.114431	0.237699	0.370867	1.42071	0.226338
TCGA-55-8510	539	0	0.604776	0.915862	0.64953	0.507798	0.0733434	1.1329	0.804869	2.21751	0.098235	0.500876	0.74954	0.0439346	2.23932	1.30204	0.424529	0.71888	0.141695	1.32018	0.161575	0.240781	1.30682	0.779614	0	0.647587	0.741472	0.463779	0.0544542	2.03562	4.97433	0.814627	0.188379	0.454307	2.26339	0.554443	1.7959	1.31105	0.131697	0.220478	0.267958	0.0423533	0.396538	0.026073	0.100609	0.470219	0.543448	2.78965	0.746243
TCGA-53-7626	929	1	0.0305568	0.0462747	0.920728	0.560651	0.271754	0.318004	0	0.144296	0.322621	0.319451	0.189356	0.13319	3.3943	1.64466	0.536242	1.36742	0.143185	1.51935	0	0.0973251	0.951371	0.281362	0.468125	0.0681664	0.936588	0.340154	0.467728	0.404661	4.34507	0.182932	1.61806	0.327918	0.555462	0.437714	0.337634	0.0473155	0.299435	0.250647	0.126926	0.106997	0.801417	0.0526943	0	0.435568	0.146444	1.45157	0.578136
TCGA-97-8176	468	1	4.06941	0.229949	1.50396	2.13436	1.15398	0.568884	5.65829	34.072	0.493285	2.0451	0.134421	0.0661851	2.31319	2.14825	4.68988	0.0424687	0.711518	0.883902	0.162269	0.145089	4.91103	4.08259	0.293838	0.257438	1.48932	0.721194	0.0546881	0.368656	8.38262	0.727224	0.189188	0.358489	0.324731	0.174008	0.629167	0.658339	0	0.498208	0.336386	0	0	0	3.43539	0.0262355	3.60217	1.21265	0.299779
TCGA-49-AAR2	2224	0	0.0260792	1.46127	1.29153	0.0162202	0.653628	1.03134	6.50767	5.20135	0	2.50688	0	0	0.165538	12.8335	0.686496	0.0729402	2.19966	1.70787	0	0.0830635	0.666535	0.720397	0.0841112	1.90823	0.159869	0.774158	0.0469635	0.287803	3.70836	2.41995	12.1308	0.074631	0.083659	4.78174	0.720397	1.37299	0.567904	0.0475374	0.693293	0.0730543	0.0854976	0	3.73107	0.0450596	17.4041	2.72908	0.772308
TCGA-49-4510	896	1	0.473838	0.358786	0.306284	1.72732	0.340528	1.04104	0	2.13885	0.299314	0.0178704	0	0.650203	3.03554	0.121445	1.45519	0.0184065	0.863466	1.24506	0.351646	0.167689	1.48628	0.0969559	0.297157	0.610735	0.0806859	0.540493	0.047405	0.682696	0.477077	1.81233	1.88592	0.306039	1.05557	1.05584	0.70899	0.203809	0.0859864	0.67178	1.06429	0.0184353	0.0863014	0.0340467	0	0.0795956	1.79777	1.88482	0.151583
TCGA-38-4629	864	1	0.0988379	0.577331	0.395964	0.079037	1.11873	0.205721	0	1.53356	0	0.483094	0.512485	0	1.22488	0.477692	0.148672	0.0987276	0.297734	1.91783	1.3203	5.64399	0.426487	0.832075	0.0910785	0.0125993	0.0865557	0.656656	0.406829	0.109075	12.519	0.211323	0	0.12122	0	0.113265	8.22974	0.437271	0.215231	0.0257375	0.25024	0.0791057	0.162015	0.024349	0	2.02487	0.0338344	1.80808	1.34734
TCGA-44-7659	444	0	7.10837	0.115131	1.17941	9.78793	0.245863	2.0571	0	0.158386	0.370468	0	0.100954	0.800827	0.160857	0	1.601	0.797375	0.80155	1.75178	0	0.0605362	2.04905	0.77003	0.490398	0	0.233023	0.583008	0.41072	1.0068	0.741898	0.796486	0	0.394332	18.0472	0.479174	0.577523	0.0588604	0.082777	2.91018	0.0842112	0.0532415	0.249241	0.0327759	0.0632367	0.7553	1.77621	1.04681	0.562853
TCGA-44-6776	1938	0	0.309772	0.0521237	0.431272	0.513775	0.361758	0.0716398	0.40081	1.40545	0.0559076	0.00934621	0	3.75062	1.60216	0.211719	0.120804	0.144399	0.9677	0.500896	0	0	0.47983	1.01416	1.60964	0	3.16491	0.527893	0	0.607746	0.863695	0.309081	0.428841	0.172371	1.28815	0.197216	0.237694	0.053296	0	0	0.209688	0.0482083	0.338518	0	0	0.0594693	0.412384	0.616102	0.509643
TCGA-67-3771	610	0	0	0.915489	1.01846	0	6.87135	1.11023	4.43681	6.58859	0.750903	1.62224	0.188883	0	0	1.85929	0.436837	0	0.166632	0.69001	0.19001	0.283156	3.30496	0.523897	0.229382	2.4116	0.871965	1.10839	0.128075	0.627901	7.337	0.532219	0	0.852274	0.0760495	3.09709	4.51861	0.440508	0	0	0.078779	0	0.408035	0	0	0.337929	1.83206	1.56685	2.22319
TCGA-67-6216	141	0	12.3913	0.169821	1.47201	0.0174365	0.113329	0.583513	0.0466377	4.34538	0.273224	0.312116	0.0992723	0.468421	0.415219	0.0862236	2.01712	1.6466	0.722518	1.97193	0	0.133938	1.26367	0.619532	0.135627	0.938101	0.343713	0.305143	0.151455	0.433138	2.0323	0.335666	0.989671	0.461307	1.43891	0.385522	0.735695	0.13023	0.122098	0.102204	0.0776332	0.0785323	0.229772	1.69208	0.0932753	0.29063	2.25047	1.50546	0.507356
TCGA-73-7499	715	0	0.467776	0.19835	0.636362	5.97004	2.87427	1.5578	0.0311271	0.914762	0.151964	0.208314	0.099385	2.52827	0.197948	0.0575477	2.23285	0.575657	0.263032	0.589981	1.8496	0.119191	0.356491	1.3783	0.724168	0.0751333	0.458805	0.592465	0.235865	1.07375	7.98192	0.672096	0	0.428365	0.0200076	2.44441	5.01358	0.463568	0	1.97819	0.14508	0.0262072	0.552078	0.112933	0.0311271	0.743565	1.45718	7.49723	1.04665
TCGA-05-4427	791	0	13.5412	0.562416	2.60797	0	0.323357	0.297306	0	2.69015	0.13921	0.954156	0.379351	0.0830139	1.39024	0.790772	0.200536	2.35708	0.870125	0.485035	3.05293	0.136486	0.305333	0.368268	0.046069	0.904959	0.875626	0.494688	0.10289	0.0630537	11.5495	0.769614	0	0.929942	0.12219	0.130952	3.35386	0.486594	0.31105	0	0.126576	0.0800259	0.0468284	1.57646	0.332673	2.09778	0.308052	0.629373	1.12801
TCGA-44-4112	370	0	13.9423	0.0828	6.03529	1.59829	0.574663	1.93463	0.181914	5.04232	18.8279	0.0148467	0.338817	0.119159	22.0959	2.52241	4.98943	4.6641	5.63647	0.928303	0.876444	4.87607	10.849	2.01378	10.316	0.219548	0.67034	1.08203	1.37844	9.53354	6.40268	0.490985	3.40613	13.5343	3.21555	0	4.0779	0.338649	0.833439	0.199327	31.1596	50.2367	33.1609	8.95724	0.363828	0.236172	6.87839	1.12926	1.3493
TCGA-50-8457	779	0	6.16555	0.137309	0.311073	1.31114	0.329876	0.37744	0	1.11448	0.220915	0.0123103	0.140467	1.10329	4.31646	0	2.18786	1.36306	0.265542	2.47407	0	0.108296	1.94868	0.417436	0.182769	0.637141	0.833728	0.302797	0.204098	0.300183	0.884808	0.814209	0.094141	0.4784	1.3331	0.259762	1.34623	0.350993	0.197444	0.619777	0.0125541	0.0317486	0.111469	0.0195447	0.0377089	0.313319	0.70612	2.43449	0.037293
TCGA-62-8402	1498	1	0.551784	1.03457	0.094066	0.0163423	1.18963	0.218758	0.087422	0.832055	0.170719	0.128427	0	0	0	0	0.461108	1.02885	0.184685	1.14715	3.58012	0.251066	0.805862	0.774206	0.127116	0.996462	0	0.415991	0.0473169	0.434954	9.81686	1.10111	0.218251	0.441757	0	0.180665	0.254036	0.040686	0	0.0478951	1.49889	0	0.215353	0.0226556	0.262266	0	1.63703	0.832123	0.0864578
TCGA-MP-A4TH	446	0	0.0912179	0.103604	0.625907	0.0851008	0.516242	0.522116	0.0379368	0.557443	1.55575	0.0123847	0.706578	0.911161	4.82506	0	1.12055	0.0956719	1.12202	0.553117	0	0.145267	1.98166	1.97381	0.0735496	1.24129	1.25815	0.203085	0.164266	1.48482	0.572243	0.0682609	2.93601	0.530236	3.87717	0.261332	0.472454	0.388426	0	0.0415682	0.429418	0.0319405	0.112143	0	0.0379368	0.275811	2.18581	0.628	0.825404
TCGA-NJ-A4YF	2161	0	0	0.0907912	0.196744	0	0	3.99312	0.398941	0.216496	0.243455	0.602345	0	0.0217766	1.07823	0	3.31414	0.04192	0.351162	0.872481	2.24241	1.0025	0.68256	0.0552033	0.14502	1.59154	0.183759	1.83901	0.0539815	0.0992434	2.7581	1.16647	0.684725	1.22242	0.0320535	8.24444	5.46512	3.80616	0.326384	0	1.6602	0	0.638781	0	1.49603	0	3.98661	4.66408	0
TCGA-78-7167	2681	1	5.8407	0.170097	0.787465	1.70282	0.261081	0.555239	7.96465	11.6338	0.775393	0.224936	0.0124292	0.703774	7.57521	0.0863638	2.51319	0.0981714	3.58557	2.82648	0	0.290671	1.96383	0.594684	0.181131	3.47035	0.516408	0.715473	0.126418	2.2002	0.469755	0.462292	0.145777	1.02456	0.0450392	0.0643582	0.717499	0.0217404	0	0.511851	0.396573	0.03933	0.184116	0	0.140141	0.206198	0.437368	0.79262	0.762272
TCGA-97-7554	775	0	2.33668	0.309201	1.44837	0.0705496	0.385174	0.236095	0	1.53762	0.110549	1.23205	0	0.560343	1.20001	0	0.796243	0.60278	0.265762	0.880398	1.21219	0.433541	0.474397	0	0.0365841	0.0910955	0.13907	0.291824	0.245121	1.12662	4.99698	0	0.141328	0.348953	2.28028	0.181984	5.82805	0.562054	1.18565	0	0.138209	0.0317749	0.297497	0.156487	0.0754802	0.685952	0.244629	6.06002	3.62042
TCGA-50-5941	567	0	0	0.1492	0.489872	0.347234	0.106205	0.0683542	0.0546325	0.355773	0.0533436	0.205104	0.0290725	0.190859	0.347427	0.505022	0.115264	0.872584	0.153886	0.796539	0.701906	0.0522995	0.366259	0.846692	0.158877	0.190479	0.603951	3.15208	0.532255	0.0362421	8.0577	0	0	0.375921	0.28093	0.0752684	1.90506	0.152555	0.0715141	0.239449	0.236448	0	0.107664	0	0.0546325	0.0851128	0.354124	1.76354	0.48627
TCGA-86-6562	376	1	0.883592	0.0892064	0.316326	0	1.3335	0.306517	0	0.0981769	0.287047	0.167952	0.860432	0.256758	4.05067	0.0905859	0.465185	0	0.138013	1.21444	1.49507	0.844286	0.314793	0.433918	4.51216	0.512492	0.180551	0.364297	0.477353	0.552563	7.06231	0	0.0611612	1.08518	0.283446	0.573788	7.36304	0.592883	0	0.107375	0.309932	0.123758	0.289676	0.0253955	0	0.203556	0.564616	2.02773	0.484568
TCGA-50-8460	829	0	2.65742	0	0.856221	1.52059	0.12891	0.663737	0.044208	1.00391	0.17266	0.151536	0.0705754	0.540544	0.112453	0	0.652892	3.90205	0.311308	0.837916	0	0	0.555699	0.342567	0.257124	0.367548	0.162904	0.157771	0.047855	0.35192	1.70414	0.715904	1.21403	0.351721	0.369404	0.274079	0.367036	0.0822973	0.231474	0.532837	0.117742	0.0372205	0	0.0229132	0	1.53815	2.80186	0.731813	0.393484
TCGA-78-7539	327	0	1.5599	0.283474	1.51711	0.00970195	0.428796	0.194806	0.80445	0.0563297	0.202702	0.160959	0.0414276	0.532607	1.74926	1.48727	0.109499	1.65788	0.292379	0.52969	0.0416749	0.0745254	0.304448	0.201086	6.21332	0.654209	0	0.25468	0.308998	1.10174	2.26161	0.0933853	0.356316	0.167399	2.18507	0.0893797	0.150814	1.01447	0.135875	0	1.4514	0.0873934	0.178988	0.20175	0.23355	1.76535	0.560687	1.56794	0.0513276
TCGA-05-5429	275	1	3.32926	13.5909	0.21592	4.79405	26.4194	0	0	4.89539	0.235121	0.766463	0	0	0.382836	0	0.0635058	0.101212	0.254356	0.877722	0.0966805	0.691558	0.470853	3.53202	0.816994	0.43593	0	0.214845	0	0.0798717	4.43947	0.216642	0	0.271841	0	0.414699	3.34875	0.560345	0	1.2533	0.220463	0.0506854	0.118637	0.0624045	0.842809	0	0.216787	0.249138	1.30981
TCGA-49-4490	385	1	2.30166	0.373456	1.59403	0.664643	0.299068	0.256642	0	7.60369	0.200284	0.17857	0.0363852	0.0597166	1.56534	0.758462	0.0721283	0.287386	1.34816	3.19006	0	0.0654545	0.63028	0.454141	0.39768	0.696832	0.251955	0.162677	0.222045	1.17931	1.94814	0.246056	1.45093	0.382263	0.0878982	0.706506	1.58949	0.381856	0.0895022	0.224758	0.250396	0.172702	0.134745	0.177194	0.0683744	0	1.18186	3.2258	1.96099
TCGA-L4-A4E6	435	0	0.275541	0.0758681	0.283974	0.0311592	0.0607561	0.364961	0.041671	0.243534	0.488254	0.0272075	3.57019	0.309353	1.113	0	0.527506	1.22604	0.234754	0.425293	0.669224	0.119674	0.60529	1.06098	0.121184	0.212344	0	0.136323	0.496195	0.387011	1.60635	0.14996	0.364114	0.349457	10.4461	0.057411	0.138389	0.310298	0.163642	0	0.360702	0	0.0821209	0.0647948	0.125013	0.41116	0.900362	0.41389	0
TCGA-44-5645	383	0	0	0.551594	0.341516	1.87705	0.525862	0.379061	0.043281	0.158992	1.64813	0.021194	0.138191	0.264604	4.89924	0	5.70715	0.0727661	0.670515	0.378621	0	1.36728	0.785844	0.335383	1.72016	0.116078	1.75436	0.399027	0.609069	0.287117	1.88603	0	0.324155	1.09818	2.03084	0.715549	0.215603	0	0	2.60832	3.48701	4.33636	0.767643	0.560818	0.302967	0.427044	2.93013	0.64482	0.0856072
TCGA-50-5066	944	0	0.0761167	0.633984	1.15812	0	0.461548	0.396072	0.506502	0.634306	0.123638	0.744078	0.370608	0.110592	0.805254	2.92631	0.0667887	0.106444	0.267504	4.43086	0.203357	0.424263	1.16724	0.140174	0.122747	0.186782	0.233303	0.188293	0.0685357	0.294002	9.12571	0.11392	0	0.20421	0.813912	0.0872272	19.6594	0.235725	0	0.277493	1.20145	0	0.24954	0.0328153	0.0633127	1.70969	0.319191	1.62451	13.0238
TCGA-78-7150	666	1	0.144437	0.473921	0.402177	0	2.88048	0.20042	0.88103	16.1221	0	0.0522941	0.0213108	0	0.203737	4.44231	0.380209	0.0336644	1.46643	0.233552	0	0.536713	0.503392	3.98985	0.271741	0.719605	0.14757	0.41685	0.520206	0.0531324	7.65156	0.144115	0.149967	0.318614	0.128705	1.73796	6.11777	0.820059	0.419371	0	0.0933269	0	0.31568	0	0.88103	0.603099	0.317265	0.828661	1.98026
TCGA-55-8620	375	1	0	0	1.55606	0.336273	2.51989	1.19154	10.8461	42.8469	0.154979	11.4514	0.168929	0.0231043	0.134584	0	0.0558127	0.0444758	0.745143	1.61993	0.169937	0.0506486	2.88192	1.05424	0.0512874	0.766242	1.36474	0.440578	0	1.29863	7.53732	0.475995	0.132086	0.193404	0.170039	3.42594	0.614973	0.935684	0	0.0579725	1.84949	0	0.729858	0.575871	0	0.109901	1.4861	0.656873	1.04649
TCGA-78-7536	244	1	0	0.584809	1.82625	0.0355825	0.161889	0.297693	0.0237934	0.119188	0.162624	0.291281	0	0	0	4.57486	3.31315	0.0200013	0.93828	0.416287	0.229268	0.091109	0.564937	0.31607	0.115323	2.09944	0.0876769	0.827914	0.257562	0.142056	19.2611	0.470933	0.356403	0.95162	0	50.269	1.00747	0.420788	0	0.312851	0.166347	0.100163	0.422005	0.0369966	0	0	0.78827	1.57549	0.0470618
TCGA-55-6981	1379	1	5.60656	0.808617	0.584091	0.0553501	4.31701	0.0926148	0.148046	0.160682	0.650489	0	1.14234	0.032325	1.7888	0.136854	0.702783	0.373354	0.104252	2.80605	2.37758	0.637757	0.971831	1.22915	0.430534	0.0397053	0.27277	0.352233	0.721166	0.294632	6.20318	0.133192	0	1.16194	0.0475799	0.917848	1.65935	0.482302	0.387585	0	0.763958	0.124646	0.145877	0.383665	0.074023	0.422846	0.852999	3.30849	0.512446
TCGA-49-AARQ	6732	0	0.82499	0.443318	2.60413	0	0.258193	3.2127	1.28388	0.125671	0.259364	0.838264	0	0	0	0	0.980752	2.00967	0.623515	1.67825	0.213298	0	1.08827	0.539096	0.8154	0.0118735	0	0.157998	0	1.49782	2.00341	0.238979	6.07891	0.323669	0	0.243977	0.808645	0.576913	1.10109	0.0485097	0.176868	0.0372743	0.0436232	0.0917852	0.132816	0.183925	11.9888	2.45511	0.350269
TCGA-55-8615	446	0	2.56351	0.444827	0.98784	0.0166083	0.92834	0.611379	0	1.2239	0.260247	0.0725102	0.33095	0.0387977	0.112999	0.328514	11.8091	0.560141	0.875893	0.582911	1.28415	0.340204	0.632849	0.442581	0	1.00077	0	0.48882	0.0480872	1.03141	5.50951	0.479586	0.0554509	0.277011	0.0285536	3.0295	1.06957	1.32315	0	0	0.295784	0.0374012	0.393946	0.0230244	4.08688	0.138413	3.26337	2.09579	1.14225
TCGA-91-6847	842	0	19.2037	0.728444	1.65581	0	0.0299152	1.54029	0	0.688635	0.480816	0.0100474	0	0	0	0	0.0324668	0.025872	0.130037	2.01928	0	0	3.92889	0.272561	0.268509	0.2889	0	0.485118	0	1.67418	19.2404	0.60916	0.0384178	1.1449	0.0197826	0.848045	0.229973	1.26048	0	0	0.092217	0.10365	0.0909785	0.0319038	0.0615542	0.0159827	0.79798	1.37559	0.213064
TCGA-L9-A50W	442	1	0.816472	0.323832	0.951125	0.108817	1.2102	1.41617	0.0646789	4.21736	0.410494	0.311444	0	0.720236	0.781499	0	1.19402	1.14179	0.819831	3.91351	0	0.0928753	0.451678	1.71838	1.84958	0.260199	0.238337	1.4042	0.0700146	0.493426	1.02983	0.814652	1.49362	0.611942	0.0207869	0.467825	1.07399	1.02345	0	0.0354351	0.0968983	0.0544558	0.732909	0	0.226376	0.134352	4.26232	8.21751	0.991466
TCGA-05-4250	121	1	1.98327	1.00114	1.18335	0.274114	5.18039	0.0705634	0.0563983	5.91401	0.0275338	0.460289	0.405164	0.0615711	0.143462	0	0.237979	0.758557	0.039715	0.698941	24.9531	1.5927	0.76407	2.02906	0.0546707	1.42182	0.519559	0.184502	0.33578	0.0374134	24.1509	0.152219	0	0.406261	0.416889	0.0194253	8.59229	0.393715	0.0369127	0.123594	0.413075	0	0.13893	0.321546	0.112796	0.48325	0.0812376	1.16701	0.44621
TCGA-86-8280	701	0	0.792705	0.400153	0.371628	3.89729	0.869786	1.25709	0.125592	0.193982	0.429202	0.00512505	0.0501251	0.918649	3.1548	0.0580487	0.629316	0.580668	0.530644	1.83113	0.201697	0.180343	0.692877	0.660393	0.182618	0.522091	0.347099	0.298811	0.509824	0.270775	2.73643	0.282478	0.274351	0.445597	1.11	0.605609	1.64229	0.350702	0.0411002	1.54816	0.40767	0.0528706	0.247504	0.0162738	0.0313981	0.521766	2.89451	3.74226	1.70785
TCGA-97-A4M3	540	0	0.023722	0	0.976634	0.0737706	0.0767161	0.296249	2.36779	0.896164	0.693578	0.180362	0.0210002	0.120632	1.35518	1.31327	8.9504	0.0995212	1.27832	1.5535	0	0.0377779	2.09446	0.39317	0.0382544	0.0317515	0.581676	0.997596	0.0427187	0.183253	1.91808	0.355036	1.37929	0.517627	0.456585	0.625246	0.589755	0.587715	0.103315	0	0.42042	0	0.0777699	0	0.118389	0.348388	0.994768	0.620604	2.02945
TCGA-55-8302	478	0	1.23037	0.50816	2.36921	0.0521755	3.21031	1.57145	1.30251	7.89177	0.317946	0.0683379	0.123773	0.10157	0.236661	0	0.0490723	1.13403	0.0655153	1.83123	8.4419	0.979699	0.779653	0.720938	0.0901869	2.93186	0	0.760905	1.51068	0.216015	6.08129	0.920721	0	0.850233	0.478411	0.0640893	1.12003	2.12165	0	0.152914	0.588503	0.430822	0.27502	0.0964426	0	0.628087	0.502547	4.42783	0.0460053
TCGA-69-7760	202	0	4.10223	0.766458	8.04232	0.0331353	0.473802	0.498995	0	4.83921	0.475952	0.622062	0.377304	1.19978	1.52176	0	0.233734	0.856782	1.37303	0.387657	2.91784	0.29695	1.74536	0.73583	3.39357	0.558585	0	0.40855	0.383757	1.11708	6.38728	0	0.553153	0.44785	8.20331	1.22104	0.956579	0.577461	6.90283	0.0485558	0.162283	0.186548	0.0873292	0.0229681	0.310197	0.253137	3.31921	5.83185	0.701202
TCGA-44-2657	400	0	0.166947	0.404515	0.577748	3.11503	0.377931	1.32043	0.0555456	0.667788	0.271175	0.362664	0	0.87322	0.847759	0.308078	0.703141	0.560316	0.156458	1.21478	0	0.0531735	1.53607	0.184466	1.99223	0.283044	2.04682	0.313868	0.240511	0.589564	3.8169	0	2.84275	0.358316	0.249922	0.229579	0.368932	0	0.145419	0.24345	0.2404	0.0935321	0.109463	0	0	0.605747	2.68031	1.74704	0.823994
TCGA-55-A490	99	1	6.63277	0.224042	1.51535	0.0153357	0.11961	0.307927	0.0410188	2.28763	0.0801021	0.38164	0.589357	0	0.104341	2.12339	0	1.06893	6.87463	1.55494	2.70088	0.0785343	0.618733	0.499485	0.357862	0.935091	0	0.500162	0.399624	0.054422	3.09366	0	0.512022	0.546852	0	1.52584	1.66873	0.229081	0	0	0.013656	0	0.161671	0	0.574264	0.447327	0.147712	7.16366	0.446231
TCGA-50-5930	282	1	0	0.756034	0.55852	1.08677	1.21088	0.259777	0	0.242684	0.20273	0.423635	0	0.0906689	0	1.91931	3.61396	0	3.21661	0	0	0.0993808	0.231992	1.0343	0.301903	0.751747	0	0.216122	0.561892	0.688681	8.5257	0.186796	0.518348	0.200907	0.934204	0.429081	4.39576	0.483149	0	0.227503	0.103686	0	0.102293	0	0.207628	0.107822	0.149537	2.23408	0.718684
TCGA-44-6146	302	0	0	1.27557	0.103092	0.0940296	2.70652	0	0.035929	5.34539	0.420975	0	0.0191195	0.470693	2.28485	0	0.189508	0	3.2891	0.628611	0.0577009	0.0687893	0.331196	6.48304	1.42797	0.472163	0.132396	0.288504	0.116679	0.095338	1.385	0.0646481	0	0.347658	1.24708	0.519751	0.208809	0.167213	0	0.0393682	0.131577	0.0302501	0.28322	0	3.52104	0.0373162	0.802173	0.47581	0.106598
TCGA-67-4679	448	0	0.413226	0.0417188	0.641052	4.81466	0.155909	2.46558	0	0.244875	0.313232	0.00748053	0.0731627	1.38089	4.66304	0	2.51393	2.19591	0.258176	2.67272	0	0.175486	0.844904	0.152197	0.26655	0.0368731	0.168876	0.163554	0.942577	0.243214	0.691285	0	0.0572061	1.15297	1.26667	0.0947087	0.456589	0.127971	0	0.954095	0.045772	0	0.541887	0.0237532	0.366629	1.66593	1.98039	0.151728	0.226616
TCGA-97-A4M7	629	0	1.41458	0.831306	1.0078	8.588	1.36558	0.878894	0	7.3368	0.548711	0.0286654	0.205597	0.613514	0.357375	0.519484	0.370514	0.501931	0.395732	0.460883	0	0.0672463	0.657345	0.933147	5.03899	0.414473	0.388278	0.031337	0.608329	1.25819	2.59014	0.821575	0.701484	1.18573	0.0903045	0.919406	0.495734	0.294232	0.0919524	3.15578	0.0116932	0.325287	0.173042	0	0.210739	0.711344	11.8892	0.988418	0.764185
TCGA-69-8453	550	0	0.0457191	1.24625	0.245511	10.5495	1.62639	0.0951594	0	2.92729	0.148525	0.00620731	2.26651	0.53141	0.33857	0	0.361046	0.191806	0.32135	0.332671	0	0	0.743588	1.47341	0.147454	0.0407962	0.280264	0.135717	0.0411656	0.176591	3.44175	1.64222	0	0.327087	3.17767	0.20957	0.189438	0.176983	0	3.50016	0.101284	0	0.0749424	0	0.836625	4.8186	0.821658	0.37771	0.338481
TCGA-86-8358	653	0	0	0.410239	0.0461812	0.264764	0.250305	1.85262	6.63104	40.5268	0.817182	1.4922	0.137036	0	0	0	0.271654	0	0.18134	0.844779	0	0.308149	1.06102	0.926475	0.748885	0.966905	0.474465	0.727565	0.41814	0.5552	35.1754	0.347518	0.0803618	0.387612	0.041381	1.37479	4.59674	0.779009	0	0.0705416	0.321497	0.0542033	1.07841	1.33472	0	0.0334324	1.391	1.22558	1.46439
TCGA-86-8673	455	0	0	0.0465742	0.495456	0	0.0994592	2.36846	0.0511623	19.3327	0.0499552	0.258885	0	0	1.82201	0	7.502	0	1.8014	1.49189	0.410826	0.19591	0.685989	0.509728	0.0495952	1.04283	0	2.61711	0.332298	0.40728	7.03139	2.20939	0.702502	0.319039	2.63086	1.48024	1.18937	1.14292	0.468801	0.0560597	0.323627	0	0.252063	0	0.204649	0.0265688	7.36956	4.70048	0.657774
TCGA-44-7662	218	0	1.00578	0.71541	1.43664	0.0379123	0.517467	0.951555	0.0253512	1.51121	0.32179	1.80418	0.0539622	0	1.28974	1.78103	0.106972	0.511461	0.357041	0.887086	0.651413	1.28624	0.899349	0.449019	0.0245747	0.523529	0.186835	0.354356	1.59167	0.79042	16.0183	0.319307	0	0.915805	0	0.192098	11.7657	0.58992	0	0	0.346038	0.0213442	0.124899	0.0525586	0.0507024	0.355455	0.438199	1.9724	2.70773
TCGA-55-8089	702	1	0.0166966	0.859691	0.757135	0.051923	3.91472	0.139009	0.166656	5.29653	0.298327	0.875026	0.458207	0.0606471	0.883182	2.15679	0	0.140095	0.117357	0.688451	0	0.744513	1.23365	1.4144	0.0807754	0.469311	0.409409	0.479115	0.180404	0.128982	13.4538	0.149934	0	0.662959	1.2319	0.267872	9.93924	0.439513	0.145435	0.0608694	0.166449	0.116928	0.109476	0	0.166656	1.06739	0.320074	0.551758	0.329635
TCGA-62-A472	910	0	1.07708	0.155344	3.2439	0	0.74641	0.427016	1.10921	9.26063	0.833108	1.36487	0	0.372599	0.108521	0	0.990092	8.60705	1.44202	3.48325	1.5073	0.24504	4.88597	0.944532	0.248131	0.045767	0	5.10047	0.277088	0.792428	6.43518	7.36924	0	0.825616	1.91953	0.764091	1.13344	0.555934	0.111689	0.0934913	1.3919	0	0.840737	0.0884475	0	0.531709	5.65353	3.74296	0.0843828
TCGA-55-A4DG	608	0	1.63793	0.684261	0.572897	0.0175642	0	5.17253	0.0469794	0.125512	1.7431	0.6058	0	0.266699	24.7371	1.21597	1.38764	5.76583	0.595482	3.42478	0.0754474	1.57406	1.79785	1.04012	0.455403	1.15917	0.173116	2.82229	2.74616	7.88477	2.59835	3.55032	0.0586424	0.616214	0.452955	0.0323622	0.234027	0.918292	0.184488	0.0514763	0.156404	0.0395538	0.370328	0.0486992	0.0939587	0.14638	0.778209	4.12175	0.278767
TCGA-MP-A4T7	167	1	1.29649	0.130893	0.180501	0.470381	0.838564	0.224877	1.1503	11.2363	0.421185	0.0293377	0.0382579	0.518019	1.18871	0.531667	1.55473	0.241742	0.253133	0.681333	0.115459	0.378529	3.27344	0.875445	0.731761	1.38827	0.529846	0.962159	0.155649	0.500773	4.09682	1.22892	0.179484	0.401938	1.59429	0.247623	0.298447	1.43874	0.0470545	0.0787755	0.215414	0.0302651	0.318781	0	4.09794	0.242676	2.30416	0.357035	0.0711007
TCGA-49-4487	855	1	0	0	0.586165	0	0.0345331	0.177805	0	0.130512	0.138759	0.742294	0	0.0620587	0.180748	0	0.5247	0	0.200147	0.207199	0.228228	0.136043	0.694696	0	0.275518	0.343024	1.30918	0.0422644	0.461507	0.188548	12.2663	0	0.798267	0.458371	1.14182	0.978953	5.60443	0.529109	0	0	0.141936	0	0.420089	0	0.071056	0.110699	0.511755	1.47031	0.0702723
TCGA-55-6980	2109	0	1.42419	1.11106	0.309005	0.161052	0.558275	0.179654	0	2.00201	0.140202	0	0.49667	0.7838	2.55678	0.132734	0.22721	0.362116	0.404457	0.62806	1.153	0.274916	0.461262	0.397383	0	0.558397	0.264559	0.0640558	1.47663	0.523899	0.962633	0	0.268856	0.540327	0.230739	0.544023	2.26509	0.334132	0.469899	0.629339	0.334628	0	0.141486	0	0.28718	1.82689	0.517077	2.37696	2.62711
TCGA-44-8117	385	0	2.32849	0.216332	0.997249	0.0533089	1.0741	1.57586	0.0475288	0.0952346	0.904945	1.58652	0	5.17844	0.93698	0.307549	0.401106	1.01882	0.602446	3.01441	0.228989	0.136497	1.78569	0.0789213	0.253401	2.18611	0.0875702	1.14495	0.231523	0.867063	5.69561	0.04276	0.118657	1.03222	4.56725	0.261926	6.7675	1.59262	0	0	1.35289	0.0200082	0.585405	0.0369516	0	0.0863868	0.119808	5.44848	0.681566
TCGA-55-8092	154	1	0.203465	0.112045	0.728404	0.0460171	0.912225	0.731484	0.800038	9.92148	1.38206	0.416879	0.0163745	0	4.4224	1.82044	0.357061	0	10.3575	1.88427	0	0.117827	2.14884	1.87347	0.268454	1.23788	0.226776	0.530773	0.566255	0.694029	2.06288	0.276833	2.80392	1.44903	0.0197785	0.148377	2.93794	2.11945	0	0	0.0409768	0.0259071	0.0909595	0.0478458	0.0307707	0	4.63175	1.96109	0.639058
TCGA-55-8621	515	0	0.131728	0.877744	0.345831	13.1251	0.511206	0.438686	0.306795	0.614733	0.213969	0.429236	3.94156	0.727286	0.445946	0.0810288	0.416107	0.442113	0.246905	0.766809	0.56309	0.125869	0.722318	0.485173	0.212427	0.188071	0	0.469241	0.711651	0.407042	3.45243	0.157722	0.273543	0.376969	3.54958	0.120765	1.56468	0.85669	0.0573708	4.89837	0.452327	0	0.172743	0	0	4.25612	1.79923	0.906899	0.476789
TCGA-97-A4LX	614	0	0	0.284952	0.884134	0.731439	0.703595	0.979108	0.899942	2.41738	0.496662	0	3.64381	2.85348	0.149297	0	2.02253	1.97351	0.110214	1.71145	0.628382	0.0749139	1.62854	0.649716	0.0758588	0.388275	1.87439	1.28004	0.381202	0.259566	5.18073	3.80182	0	0.588952	0.402405	0.134768	2.07909	0.619142	0	0.214367	0.403821	0.0329434	0.154218	0.0202802	0	3.84035	3.43802	5.82946	2.167
TCGA-55-7284	243	1	3.6121	1.51405	0.19243	2.54746	2.50316	0.10069	0	6.61143	0.602436	0.0875745	0.057101	0.410008	0.443545	0.0991909	0.113194	0.0902017	1.36011	0.782237	0.0430814	0.898807	0.35219	5.64225	1.2482	0.294977	0	0.0558463	0.435582	0.12457	1.75345	0.434416	0.0334856	0.282647	3.94862	0.757648	1.02451	0.349571	0.386265	0.529086	0.10717	0.1581	0.237895	0	2.54845	0.7244	0.792133	0.310849	0.689778
TCGA-71-6725	256	0	0.0301156	0.0228033	1.06916	1.48909	3.68876	0.783532	0	0.0878373	0.269046	0	0.0399903	0.185962	6.62686	1.48198	1.3741	0.315861	0.282236	2.66613	0.160916	0.0719399	0.839673	0.0277299	0.121412	0.00671822	0	0.46189	0.894834	0.13294	3.56861	0.225364	0	1.00725	1.3364	0.793765	0.0623923	0.326426	1.14765	0.411713	0.125094	0	0.493654	0.0259668	0	0.0520338	0.126288	4.54063	0.421148
TCGA-69-8254	409	0	5.85823	10.1685	1.03677	7.95876	2.87993	0.129166	0	3.25457	0.241923	0.131439	0.241724	0.351643	0.183825	0	0.392058	0.225637	0.116317	1.38477	0	0.0790626	0.219167	2.51422	5.90441	0.476228	0.304337	0.251764	0.0447014	0.273941	1.45342	0.074303	0.0773199	0.221988	1.23426	0.170678	0.394276	1.05702	0	3.46145	0.109983	0	0.162759	0.353154	2.41575	0.41817	0.907103	0.461422	0.122518
TCGA-44-7672	418	0	5.34395	0.0588566	0.858011	3.29955	1.19404	0	0	4.41011	0.0946939	0.569887	2.11596	0.197638	0	0	0.647942	0.108701	0.182116	0.706997	1.5575	0.835565	0.53278	1.14516	0.470057	0.147391	1.19124	0.105756	0.279954	0.128672	6.17664	0	0	0.229392	0.103896	0.69034	4.50907	0.541623	0.2539	0.495906	0.0753372	0	0.191122	0	0.48491	2.16562	0.791609	0.882985	1.27883
TCGA-50-5931	434	1	0	0	0.752121	0.639582	0	2.9689	0	0.783229	0.215528	0.369311	0	0	0.0701868	0.102024	0.0582137	0	0.388599	1.12641	0	1.05655	2.32764	0.366531	0.106987	1.46521	0.203349	0.18053	0.238946	0.805374	13.7809	0.0992943	0	0.973021	0	0.114042	5.95613	0.975936	0	0.302332	0	0.0464617	0.0543755	0	0	0	1.19233	1.23324	1.91014
TCGA-55-A491	626	0	1.70293	0.158701	3.26709	0	0.953172	0.272651	0.0435837	0.130995	0.510665	1.5153	0	0	0.0554327	0	0.229883	0.659476	0.429676	0.0635448	0	0.0417225	0.827864	0.627211	0.253492	0.654581	0	0.298123	0.0471791	0.636075	4.01757	0.0784215	0	0.590418	0	0.360277	1.37504	0.365108	0	0	0.116079	0	0.0429451	0.0677689	0.0871674	0	4.95956	0.865773	0.215515
TCGA-97-7553	1870	0	0.0429492	0.0975624	0.448462	2.8449	0.0694482	0.670458	0.071449	0.268433	0.174408	1.4928	5.8743	1.15444	1.54485	0	0.753717	0.150155	0.150941	0.572948	0.0573725	0.239392	0.429102	0.395469	0.277042	0.153298	0.921497	0.244364	0.96679	0.118494	7.36459	0.0642802	0.0445935	0.368725	3.85773	0.31992	0.355922	0.133009	0	0.900316	0.154615	0.0902337	0.176005	0.0555485	0.0357245	4.56377	0.231564	1.09405	0.070661
TCGA-93-A4JN	718	0	0.11616	0.422186	1.24756	0.144494	0.225395	1.4023	0.0386481	0.838935	1.01888	0.365891	0	0.151895	0.0983105	0	0.896939	0.552306	0.97976	1.01428	0	0.0739953	0.982416	1.06958	1.46111	1.6688	0.712078	0.11494	0.167346	3.20479	4.66378	0.347704	0.578915	1.52912	0.422313	0.0266232	1.2835	0.467655	0.202362	0.296433	0.257335	0.423012	0.0761637	0.0200315	0.231889	0.0602105	3.78555	2.81501	1.29954
TCGA-86-8055	124	1	2.49696	1.05177	1.59838	0.0719937	1.45726	0.413019	0.137545	8.33698	0.08058	0.0224512	1.27358	0.0360386	0.839708	0.508586	0.087058	0.416246	0.154972	0.681836	0.0883573	5.24052	0.207475	0.913571	6.71993	0.715646	0.304107	0.179987	0.655124	0.255485	8.34509	0.197991	0.583753	0.331252	0.247548	0.303198	30.125	0.896185	0	0.0602845	0.137375	0.162127	0.027106	0.285161	0.027509	1.27142	1.6048	1.16122	11.8889
TCGA-55-8508	617	0	4.89315	0.407896	0.0267852	0.0279206	0.326648	0.654056	0.0746798	0.623491	0.510425	0.682631	0	0.0326118	2.27959	0.276136	2.99363	0	0.315532	0.653296	0.239867	0.357453	2.04435	0.165341	0.0723923	0.801151	0.27519	0.421988	0.242522	0.396328	3.75493	0.671868	2.61015	0.818971	0.0480021	6.68771	0.806035	1.45975	0.195512	0.163657	0.149175	0	0.220757	0.116121	0.14936	0.0387816	3.01199	1.79255	1.55098
TCGA-69-7761	186	0	2.15333	2.93075	0.292745	0.101718	3.23949	0.113467	0	15.4459	0.84122	0.0666136	0.0241299	0	0	1.00599	0.23917	0	1.27724	0.661121	0	0.303857	1.64662	4.71845	0.219778	0.936413	0.167092	0.256226	0.294512	0.150403	8.89177	0.489539	0	1.70631	0	0.0937082	1.12942	0.506478	0	0.0993702	0.181154	0.0381774	0.268081	0	0.906891	0.0470953	1.30631	0.412845	0.224222
TCGA-J2-8192	739	0	7.52289	0.190581	0.400475	0.434845	0.972246	0.844024	0.0232618	2.55968	0.454259	0.0683456	16.0551	0.27427	1.44971	0.172025	0.687089	0.70396	0.425898	0.576564	0.0373577	1.18022	0.253416	0.180255	0.699027	0.929567	0.257154	0.200625	0.251808	0.478372	2.72909	0	0.522661	1.34052	0.523321	0.240362	13.3067	0.454691	0.852592	0.229396	0.185864	0.391701	0.206289	0.192907	0.116309	2.94751	0.418837	2.19491	9.36312
TCGA-MP-A4SV	2620	1	3.60326	0.0727561	2.33627	1.01596	0.660326	0.849978	0.239771	0.49378	1.71683	0.469648	0.042531	0.349017	1.52478	1.92091	0.800959	1.61246	1.51959	2.03924	0.192532	0.191276	10.2251	1.15018	0.116213	1.07176	0.294513	1.23601	0.216292	0.768784	11.319	2.66047	0.349179	2.1826	0.69353	1.21124	3.28464	0.111589	1.15082	0.262722	0.665205	0	0.275634	0.724933	0.159847	0.477304	1.32393	5.29217	0.553294
TCGA-78-8660	321	1	1.08145	0.398367	0.401111	0.181789	3.19017	0.425851	1.31283	1.33964	0.237381	0.00793672	0.129374	0.0849332	0.185528	2.15748	0.307758	1.67584	0.342401	1.34696	2.18646	0.186188	3.11034	2.85278	0.0471341	2.20386	0.179174	1.35931	0.0526347	0.290302	10.4312	4.287	0	0.460038	1.12514	0.904359	1.65515	0.814653	0	0.106556	0.323755	0	0.191644	0	0	0.0252504	0.700386	0.643924	0.192349
TCGA-05-4424	913	0	0	0.235522	1.08262	0.177337	0.419131	0.431608	0.0862413	0.136803	0.12631	3.8571	0.091786	0.0564908	0.0548437	0.797213	0.136464	0.0362483	0.12146	1.50887	0.207751	0.165117	1.01179	0.238672	0.125399	0.150342	0.158897	0.128242	0.326745	0.0286053	11.3465	0.232765	0.0538258	3.22671	0.526618	47.9127	2.00484	0	5.98317	0.236241	0.057423	0.036305	0.127467	0	0.0431206	1.2316	0.124224	0.999337	0.25587
TCGA-95-8494	84	0	2.48734	2.90144	3.02839	0.397209	14.702	2.02888	0.111834	8.47786	0.655172	0.511125	0.357072	0.659294	0.995666	0	0	5.07656	0.315009	5.29923	30.7119	0	2.74905	0.928498	0.0542042	0.0299934	0	0.86475	1.45272	0.482224	12.933	0.503066	0.0697989	1.15428	0.143767	0.115557	1.1142	0.780709	0.0731955	0.245078	1.82436	0.0470788	0.165293	0.956407	0	1.88747	0.161089	11.2465	0.442402
TCGA-50-5045	2174	1	0.279879	0.0605491	0.465199	3.80475	0.210117	0.29127	0.066514	0.594188	0.0974171	0.0814272	1.18574	0.304982	2.03033	0	0.0350829	0.41935	0.562061	0.824305	3.09777	2.13306	0.510942	0.257708	0.128953	0.214065	1.4706	0.247267	0.252004	0.44124	3.23287	0	0	0.235989	1.47499	0.229094	11.0446	0.154777	0.130601	1.67626	0.0775036	0	0.131079	0.293033	0.033257	2.59058	1.60479	2.00944	1.41428
TCGA-55-8619	416	0	0	0.168609	0.24912	1.21184	0.157528	0.289674	0.185219	3.23964	0.271274	0.196514	0.665305	0.363974	0.176681	0	0.146541	0.23355	1.04343	0.877658	0	0	0.995962	1.28148	0.0448865	0.223537	0.17063	0.12394	0.451123	0.491482	1.31933	2.8328	0.0578004	0.318619	2.1132	0	0.499778	0.0431003	0	0.55811	0.0308317	0.0389859	0.0912527	0	0.509353	1.77943	1.20058	0.229957	0.412147
TCGA-49-AARR	4992	0	0.108504	0.410792	0.275149	59.9438	1.29394	0.45168	0	0.25619	0.660921	0.0441951	4.49056	0.532062	0	0	0.952071	0.113802	0.317772	0.657935	0	0	1.22271	0.34968	0.131231	0.847182	0.166286	1.63731	0.488487	0.598713	1.13448	1.38034	0.394303	0.436651	1.21824	4.66283	0.412123	0.336025	0.0590701	16.9104	0.0901404	0.0759869	0.0444649	0	0.0902521	0.72646	2.66503	0.634958	0.580168
TCGA-50-5944	764	0	0.0297616	0.180282	0.0355154	0.814461	0	0.123891	0	0.0578697	0.0483423	0	4.03106	4.23764	0.440795	0	3.13372	0.915633	0	0.433115	0.0795122	0.0473961	0.44256	0.548078	0.575926	0.132785	0	0.161969	0.214379	0.229909	3.15324	0	0.123604	0.287445	0.954716	0.102317	0.698799	0.0460841	0	0.433997	0.247246	0	0	0.0256614	0	1.61979	0.249607	2.13093	1.32204
TCGA-55-8616	48	0	0.885259	0.0812497	1.07242	8.77616	0.173509	1.22838	0	0.0149034	0.522889	1.07809	0.11874	0.0194881	4.25697	2.14516	0.517848	0.375145	0.691367	2.8629	0.143339	0.213606	1.22166	0.0494019	0.47586	0.694187	0.822236	1.56611	0.579701	5.06238	3.29099	0.883285	0.055706	0.863644	0.0860548	0.215192	0.741028	0.332309	1.16834	2.10265	0.0445717	0.0751465	0.175892	0	0.044627	0.208575	1.38206	2.99193	0.0441347
TCGA-67-3774	385	0	0.201495	0.174366	0.257626	3.13305	0.558539	0.239652	0.191543	3.90197	0.140268	0.023449	0	1.88201	1.94894	0.885312	0	0.0805081	0.674413	0.0698173	0	0.183364	0.414663	0.0530094	0.278514	0.102742	0.705824	0.299068	0.0518362	0.381197	1.44463	0.0861625	2.03232	0.329498	7.01777	0.0329867	0.437328	0.846867	0	1.04939	0.28696	0.040317	0.0943685	0.0248194	0.335201	0.547082	0.931178	0.475617	0.520935
TCGA-50-5933	2393	1	0.469751	0.334769	0.741931	0	0.312768	0.057514	0.183874	1.72703	0.0448839	0	10.3229	0	2.92329	0	0	1.42976	0.323704	0.134043	0.516768	1.49618	0.539306	0.81419	0	0.480813	0	1.02533	1.3933	0.27445	17.1807	0.827125	0	0.326189	0.147736	0	18.3193	0.128362	0	0	0.122431	0	0	0	0	2.17232	0.297964	0.83705	3.95515
TCGA-05-4418	274	1	4.57569	0.0451423	0.373507	0.05562	4.16936	0.0620444	0.545483	6.29716	0.0968387	0.00809438	0	0.0216551	0	3.39219	0.313871	0.0416861	0.733325	0.903763	0.0398195	1.30547	1.46832	0.933219	0.336493	0.565235	0.365467	1.12085	0.10736	0.131586	4.3634	2.05224	0.123801	0.197267	0.0318746	0.170801	2.90258	1.15394	1.07106	0.0543362	0.437497	0	0.17102	0	12.918	0.347652	0.42858	0.472014	0.245212
TCGA-91-8499	36	0	0	0.0511913	0.705928	0	0.355287	1.12573	0	0.0657289	0.329445	1.1382	0	0	0.0715226	0	0	0	0.0791991	0.737904	0	0.538328	3.14165	0.249005	0.59963	1.58359	0	0.568623	0.304367	0.223828	18.9441	0.202368	0	0.350667	0.0722917	0	7.93702	0.314056	0	0	0.0374431	0.0473459	0.0554104	0.320611	0	0.0584055	1.01252	1.07053	0.0556141
TCGA-97-A4M0	652	0	0.293733	0	6.90258	0.337274	0.200945	1.92818	0.0751762	5.17799	1.10104	0	0.0200024	1.44446	1.48202	0.0694928	0.832687	2.78058	0.317629	1.47969	0	0	1.87944	0.665758	0.0728735	0.31251	0.415529	0.860765	0.162756	1.02234	1.57495	1.8261	0	0.711259	0.386569	0.0517859	0.0312074	0.419842	1.08246	0.0411861	0.0625693	0.126588	0.518523	0.0584462	0.0375881	1.30782	4.68337	0.280002	0.334562
TCGA-L4-A4E5	578	0	1.50832	0.392591	1.364	0.395766	0.743109	2.15834	0.0784121	0.15057	2.56483	1.11992	0.0208634	0.4109	0.149595	0	4.34265	1.3183	1.76694	5.37325	1.07038	0.0750636	2.88028	0.737816	0.266036	0.641408	0	0.594658	0.169762	2.60085	9.26509	0.705447	0.587272	1.35729	0.252005	0.86424	1.92049	0.182464	1.28302	0.128877	0.482943	0.297083	0.695369	0	0.156824	0.0610797	5.87325	23.4617	0.542831
TCGA-69-7980	411	0	1.03714	0.417199	5.88854	0.886958	0.786113	0.505946	0.0269587	7.93612	0.473808	0.246424	0.0573839	0.258996	0.137152	2.59174	0.511898	0.203959	1.10107	0.550279	0.0865898	0.232267	0.609972	0.716236	0.70559	2.3932	0	0.200439	0.087548	3.91656	4.78941	0.194031	0.100954	0.63186	0.329238	0.0371416	1.63391	0.200744	0	0.768021	0.116676	0.0680929	0.0531274	0.0838369	0.431339	0.195997	1.14555	0.624778	1.01313
TCGA-05-4398	1431	0	0	0.675878	1.14962	0.20311	0.0176017	1.45005	0.470829	0.244924	0.601173	0.401998	0.125275	0	1.17463	0.602631	0.840532	2.78576	0.433568	3.61715	0.697973	0.676083	2.80237	1.34311	0.0351082	2.27293	0.533837	2.41274	0.450862	0.156169	10.6227	1.14043	0.0226045	0.965687	0.162958	1.7589	3.1573	1.70242	0.90077	0.0992111	0.385843	0.137219	0.142748	0.0187717	0.14487	0.517219	4.82562	2.63798	0.268636
TCGA-78-8640	6528	0	0.0912543	0.322453	0.362989	0.0756753	0.0737783	0.633121	1.41687	0.278833	0.0988174	0.00825977	0.053856	0.220976	0.321799	2.61951	0.587189	0.0850756	1.49662	2.7298	0.0812663	0.629741	3.75994	0.0560169	0.343368	0.569998	0	0.496627	0.164331	1.14134	10.0077	3.36888	1.2633	0.467882	1.04083	3.34638	0.420127	0.0942014	0.198717	0	0.471707	0	0.149584	0.0786827	0	0.840902	0.656005	0.837668	0.0500445
TCGA-05-5425	882	0	0.057157	0.34623	0.630918	0.337719	4.15899	0	0.0475423	0.301662	0.0464206	0.248328	0	0.332179	0.24187	3.86743	0.20061	0.119896	0.736532	0.623848	0.0763515	0.22756	0.584331	2.47357	0.0460861	0.510025	0.17519	0.226227	0.0514643	0.157693	5.65739	0.0855444	0	0.255573	1.13068	0	2.2499	0.840791	0.124466	0.260466	0.269073	0	0.187383	0.0246414	0.427881	0.419712	0.0684813	0.747658	0.423162
TCGA-55-7727	119	0	3.84141	0	1.91487	0	0.314506	0.80967	0.161783	0.202606	0.868815	0.792228	0.0860925	0.353245	5.24706	0	0	1.90399	0.227852	0.235879	1.94864	0.774373	1.01682	0.537281	0.548898	0.889486	0.596161	0.842007	0	0.429295	14.7777	0.291102	0.706817	0.660971	3.37967	1.17019	0.805921	0.376468	0.529437	0.17727	0.673263	0	0.398532	0.167706	0.161783	0.546097	3.37904	2.20946	0
TCGA-91-8496	505	0	0.490891	0.297359	0.0976328	0.183189	0.132294	0.136232	0.108884	0.172721	0.531576	0.0622053	16.7453	2.04458	4.63929	0	1.03376	0.823777	0.15335	2.54004	0	0	0.471436	0.0602671	0.369421	0.0438033	0	0.161912	0.648266	0.108347	0.912456	0.293878	0.815494	0.210718	2.06464	0.562545	0.768406	0.0506745	0.14253	0	0.0724996	0	0.107289	0	0	6.84183	1.37235	0.630858	0
TCGA-78-7535	949	1	0.0923663	0.023313	1.01957	0.0191494	2.11586	1.34576	0	0.166773	0.225049	0.681375	0	0	9.41332	2.65143	0.837485	0.495146	2.66903	1.60556	0	0.147096	0.236071	0.0283498	0.322727	0.00686839	0	0.921579	0.0277223	0.883422	2.66117	0.599043	0.191805	0.30838	0.213995	0.282263	0.127574	0.286048	1.24035	0.0280611	0.136416	0.0862471	0.0757032	0.0132736	0	0.0132992	2.39777	14.0111	0.582525
TCGA-69-7763	690	0	2.45797	0.169196	1.11661	0.92073	0.767801	0	0	1.994	0.136109	0.455073	0.0741801	0.588443	1.71386	0	0.735255	0.117181	0.719857	0.406483	0	0.311372	0.506204	0.257188	0	0.0623098	0	0.345477	0.301795	1.29463	1.47967	0.0836076	0.522014	0.619472	0.537606	0.864231	4.35934	0.648755	0	0.254569	0.495024	0.0391216	0.0457851	0	0.46466	1.23063	0.200793	0.884569	1.74623
TCGA-55-A48Z	651	0	6.47309	0.0756968	2.57982	0	0.646603	1.35251	0	1.24269	0.324768	0.346113	0	0.508373	0.264402	0	1.88596	1.39803	0.468448	0.666809	0.667714	1.15424	0.778133	0.41423	0.161214	0.73595	0	0.346222	0.810124	0.992926	4.80816	0.299243	0.155697	0.876141	0.427592	0.286407	3.65903	1.08359	0.217697	0.0455568	0.221469	0.420064	0.0819356	1.37917	0.0831539	0.215911	3.47354	1.82389	0.904605
TCGA-55-7907	343	1	2.76673	0.239422	1.03765	2.65494	0.607151	1.06946	0	0.12077	0.192602	0	0	0.0861394	0.167256	4.13311	0.277448	0.386909	0.277811	1.62972	0.527979	0.188832	0.312236	2.11083	1.40223	2.2043	0	0.625752	0.284705	1.48303	5.62026	0.11831	0	0.975557	0.338108	1.22294	1.6923	0.612017	0	0.648413	0.262682	0.0553592	0.129577	0.0340795	0.197256	0.102436	0.520911	3.21092	1.82075
TCGA-55-6970	464	1	0.152228	0.0256146	0.100921	0.0420798	0.0957249	0	0.393931	12.8407	0.219793	0.0183716	0.0149735	0.34405	4.40189	0.936384	3.38383	0.260188	1.03035	2.09227	0	0.484854	1.06895	0.841012	0.027276	0.0377323	1.5553	0.48536	0.243673	0.373322	5.89494	0.303777	0	0.308573	1.33838	0.581493	0.864373	0.157144	0	0	0.393444	0.0473809	0.166354	0	0.506483	0.087673	0.385041	0.465791	0.333931
TCGA-L9-A443	193	1	1.92323	0	0.894395	7.2122	0.274396	11.0083	0.141151	0.117845	0.0918805	0.0383997	0.100151	2.38337	3.82987	0	0.496335	8.82002	4.17467	0.82319	0	0.585534	1.06457	0.208338	0.0456092	0.113568	0	1.07745	0.203727	2.43455	3.62742	0.846591	0.528579	0.465388	4.86906	0.324111	2.26568	1.40142	12.1946	2.37149	0.203632	0.118841	0.741775	0.170705	2.39957	0.0977339	3.32086	4.12798	4.8858
TCGA-55-7994	603	0	6.30441	3.89058	0.0806784	0.0840984	3.86721	0.949847	0.140587	11.2773	0.356903	0	0.0448878	0.0122786	6.7232	0.0519835	1.0678	1.51272	0.5148	3.4026	4.65105	0.0807502	4.73609	1.27616	0.21805	0.00754098	0.310833	1.78951	0.547866	0.540923	19.0857	0.252963	0	0.616696	0.0361462	1.23962	1.75083	0.523433	0.0736117	0.030809	1.74113	0.0473465	0.193938	0.888978	0.927877	0.262828	0.141754	5.02688	0.0834221
TCGA-44-6145	328	0	9.30954	0	0.219002	0.498078	0.809321	0.277804	3.33055	9.09265	0.379397	0.027182	0.059078	0.0969608	1.97681	2.36038	0.234227	0.0933248	3.28347	0.485593	0	0.159416	0.387642	1.22897	0.161427	0.22331	1.63638	0.231119	0.36053	0.331412	7.62879	0	4.22668	0.716162	0.535196	0.535333	6.86686	1.03335	0.145323	0.121645	0.184802	0.0934709	0.218783	0.0575413	0.610601	0.201783	0.239871	1.47022	1.31753
TCGA-55-8096	719	1	4.78773	1.90324	0.892711	0	2.72168	1.46363	0.298677	0.369885	0.534655	0.138132	5.12581	0.249988	1.4562	1.97869	0.183793	2.36429	0.350541	1.3427	0.0399721	3.24045	1.42528	1.12967	5.81469	0.921193	0.366868	0.45894	0.26943	1.08975	1.96063	2.19446	0.52817	1.24701	0	0.651531	4.3189	0.417011	0.847098	0.927256	0.107722	0.272424	0.0735751	0.0129005	0.149338	2.22316	6.68637	1.89529	4.47997
TCGA-86-8671	839	0	0.0279374	0.21154	0.416733	0.0868798	0.587267	1.10483	0	1.32703	0.272276	0.0303447	2.54739	0.608864	0.295556	0.257773	0.58833	1.01579	0.0654555	1.01642	0	0.444911	0.727012	0.205794	1.53178	0.0249292	1.54134	0.179686	0.855268	0.524128	2.57051	0	0.928223	0.319795	0.238987	0.0640308	1.77498	0.302817	0.121674	0.254623	0.123782	0.0782598	0.137385	0.0240886	1.3478	1.64119	4.61921	1.0771	1.3789
TCGA-73-7498	1189	0	0.170501	0.193653	0.568006	0.238601	0.195286	2.01099	2.34003	6.95424	1.06164	0.065589	0.113204	1.40377	10.8827	0	1.82021	1.03322	0.898814	1.51634	0	0.294155	1.24788	0.36632	0.160389	0.893835	0.348398	0.815434	0.0767598	0.501763	1.10923	0.595424	0.383562	0.411687	1.3066	0.732707	0.372862	0.0880038	0	0.0258993	0.779046	0.0199007	0.232904	0	0.0709101	1.00652	1.58319	1.36947	0.11688
TCGA-44-7669	574	1	0	0.0770531	1.25483	0.7595	0.329094	1.72975	3.61147	50.3673	0.826468	2.22902	0.180172	0.455876	0.179426	0	2.73825	0.0474358	1.54974	0.329094	0.543742	0.135048	3.32592	0.624669	0.0547007	0.923177	0.623813	0.721632	0.274879	0.131019	13.7135	0.101535	0.598726	0.527823	1.48711	0.52477	1.40551	0.367668	0	0.247323	0.0939323	0.09502	0.361416	0.0292475	0.0282146	0.21978	0.629937	0.677237	0.139517
TCGA-91-6840	372	0	0	2.38612	4.32461	0.0489992	0.318473	0.163976	0.0655296	0.229781	0.319918	1.94672	0	1.86004	0.083345	3.51338	0.483891	0.110172	0.646033	1.62421	0	0.0627312	0.585752	0.652869	0.635224	1.47628	0	0.175398	0.0709355	0.0869419	4.6128	0.825367	0	3.00132	0.379085	0	0.435246	0	0	0.646221	0	0.110344	0.258278	0.0339643	0	0	0.283172	0.867814	0.324034
TCGA-71-8520	210	1	2.54972	1.70497	1.36327	0.0411902	2.03466	2.41226	0	10.8354	0.806798	0.746304	0.234511	0.048111	0.420374	0	2.32442	2.08381	0.232746	1.68662	0	0.791006	0.461626	1.76843	4.6991	0.797789	0	0.442334	0.119261	0.548145	5.26253	0.198237	0.343809	1.39772	0.0708157	0.151787	8.50674	0.051274	0	0.0603592	0.440144	0.278276	0.379953	0	0.220345	0.514918	1.94402	6.52	1.85227
TCGA-38-4628	1492	1	0.0142009	0.129033	1.53364	0.176647	0.574064	0.0886728	0	0.0197234	0	0.320058	1.78515	1.47524	0.390608	1.70337	0.0996845	0.436898	0.0998149	0.826652	0.0758792	0.226153	0.250764	0.209214	8.49608	0.285114	0	0.0421551	0.716043	0.0470152	3.91983	0	0.117956	0.0812775	0.364438	0.358022	8.2182	0.0219892	0	0.051771	0.0235949	0	0.279336	0.0367334	0.188993	9.52006	0.0340288	1.46651	5.13998
TCGA-MP-A4TK	582	1	1.35269	0.223471	1.70226	0	1.0141	0.819048	0.0818287	4.52262	1.67786	0.447451	10.5596	0.178668	0.260188	0	0.258964	1.23817	0.691474	0.715835	1.8398	2.11502	0.742874	0.271752	0.237967	0.438922	0.603066	0.316368	1.01866	1.35709	6.583	0.220855	0.102143	2.40178	0.604868	0.366396	6.01251	1.18057	0	0	0.149834	0.103342	0	0.721007	0	3.29329	0.825079	1.45617	13.191
TCGA-62-A46V	2199	0	9.83422	1.1456	1.53464	0	0.937796	4.46117	0.0838969	0.0770487	0.737257	1.35574	0.223227	7.82196	5.28193	0	2.8321	6.02996	0.76803	1.83482	0.202104	0.481885	1.23036	0.650115	0.894598	0.87753	0.154577	0.661204	0.272454	3.53412	3.93714	1.20767	0	1.18163	0.0808898	0	5.05	0.702818	14.6062	0	0.754138	0.0353181	0.454672	0.0869683	0	0.718874	9.09377	3.5762	6.84516
TCGA-78-7153	760	0	3.07098	0.192175	0.424015	0.0157853	0.205195	0.158477	0.844427	0.24675	0.0412252	0.289452	0	0.0737503	1.074	0	7.83893	0.0354923	1.12981	3.44728	0	0.202092	2.63004	0.701083	0.0409281	0.249119	0	1.3059	0	0.308096	3.18436	0	1.10677	0.0635514	0.0542774	4.62445	0.350541	0.117898	0	0.0925258	3.96389	0	0.166411	0	0.0844427	0.0657773	1.00348	0.733872	0.29229
TCGA-91-A4BD	603	0	10.4194	0.164936	0.498217	11.0416	1.26213	3.09811	0	0.625242	0	0.0788651	0	2.98023	0	0	0.254843	1.62462	0.340235	1.23277	0	0.0578157	0.607335	0.133714	0.351269	1.15003	0.222551	0.0538846	0	1.80291	0.80978	0.10867	0	0.129866	1.82454	0.0832072	0	0.224861	0	4.16909	0	0	0.23804	0	0.966317	4.76723	9.3954	1.59963	0
TCGA-44-6778	1110	0	0.069301	0.262371	0.785643	0.150859	0	0.288486	0.749366	1.3764	0.506552	1.3549	2.97546	0.22655	0.14663	0.319714	0.121617	0.0969132	1.46131	0.588308	0.0925738	0.0551819	1.25595	0.701923	0.223511	1.88609	2.33654	0.548585	0.811185	0.267676	7.92212	0.20744	0.143908	0.334664	3.66811	0.0397083	0.765734	0.107309	0	0	0.0959537	0	0.283995	0	0.0576435	1.10758	0.747282	0.763378	0.0570078
TCGA-64-5781	1202	0	0	0.337857	0.076066	0	1.93257	0.0663366	0.58322	6.61328	0.103538	0.0173087	0	0	0.202303	0.196046	0.223723	0	0.597377	0.618423	0	0.304535	0.296207	0.528236	0.0513959	0.654107	0.195375	0.457279	0.286969	0.140689	4.79856	0	0	0.14821	0	0.0365234	2.50912	0.246754	1.11045	0.0580952	0.211817	0	0.208973	0	0.5302	0.165201	0.0763715	1.88702	1.41575
TCGA-55-7903	567	0	0.310542	0.289403	3.27821	0.0445718	0.328323	1.34244	0	0.418037	0.582022	0.50595	0.317205	0.399133	0.808685	0	0.335367	2.70586	0.111935	2.43345	0.191459	0.0760841	1.35427	1.18776	0.192609	1.43881	0.146436	0.626379	0.903364	0.738137	8.92483	1.07256	0.0992094	2.02517	1.50705	0.191623	0.296939	0.36989	0.36413	0.043543	0.264599	0.200748	0.391568	1.13283	0	0.268277	2.17517	2.07218	0.0393008
TCGA-95-7947	40	0	0	1.02239	0.29395	1.30508	0.7081	1.40519	0.0303542	0.339586	0.059276	0.0198186	0.856102	0.0662766	0.270246	0	0.544352	0.051033	0.0427501	0.7081	0.0487479	0.174347	1.15314	2.45294	0.588488	0.0407043	0.223706	0.20763	0	0.261772	12.6167	0.655407	0.227339	0.45689	0.292662	1.2755	1.00806	1.77997	0	0.532156	0.0505277	0.102226	0.179457	0.17306	0.0303542	0.267972	0.174892	3.11537	0.180116
TCGA-44-A47B	287	0	4.13992	0	3.03815	0.0275386	0.733854	0.460792	0	0.990088	0.827084	0.595143	0	0.144745	0.28105	0	2.25336	2.10524	0.829908	0.644359	0.0591464	0.246794	0.504096	0.407697	0.285608	0.404973	0.135713	0.36145	0	0.488633	1.85178	0.662677	0.689584	6.46214	7.90668	0.811843	2.53791	0.274243	0.192837	0.0403545	0.147134	0	0.254026	0	0.294633	0.0191255	0.371348	0.975461	1.34765
TCGA-44-A47A	466	0	6.6958	0.118366	1.11927	0	0.442348	1.62684	0.0866842	0.15198	1.10031	0.0565972	1.17628	0.435321	0	0.160262	0.82299	4.48144	0.366252	1.39024	0	0.954298	5.8961	1.29545	1.13439	0.267356	0	0.386701	0	0.690053	2.61511	0	0.0541022	0.493948	0.167155	0.119427	1.76325	0.322741	0.0567349	0	0.028859	0.072983	0.854141	0.0224644	0	3.33115	10.8006	3.37215	0.128592
TCGA-J2-A4AD	550	1	0	0.532735	1.91377	3.79674	0.200763	3.87636	0.447518	1.30482	0.73947	3.61304	0.128232	0.0601311	1.92647	3.18219	1.63415	0.115752	0.72724	1.6061	0.0552847	0.329544	1.15392	1.40999	0.36707	1.58799	0	0.941887	1.22972	1.9411	8.01972	2.10599	0	2.18366	0.420415	0.355705	3.05815	2.56337	0	0.754394	0.160449	0.289834	0.13568	0.249793	0	0.0715072	0.24793	2.99175	2.75763
TCGA-55-8203	547	0	5.61053	0.146491	0.913861	0.0701916	1.0167	0.704691	0.0268204	2.4452	0.654691	1.28709	0.0856343	0.0234243	0.443456	0.297513	5.12102	1.33021	1.43538	0.782081	0.473801	0.231076	1.25115	0.593802	2.18391	0.0575449	0.790651	0.526445	0.203231	0.693892	4.76484	0	0.0669577	0.455604	0.155155	3.01151	2.56077	2.19686	0.210648	0	0.544674	0.0225812	0.184992	0.097308	0.64369	0.0835679	2.33729	2.90808	1.43233
TCGA-97-A4M1	601	0	0.143612	0.0362471	0.499848	0.96764	0.40638	0.7971	0.0398179	0.139622	0.0388785	0.103991	1.56798	4.03402	3.89952	0	0.546052	0.836799	0.392551	0.290272	0	0	0.734089	0.396705	0.0771966	0.811603	0.293453	0.0947354	0.689644	1.4792	0.800824	0.50152	0.0994063	0.222611	2.0987	0.246861	0.297529	0.185312	0.156365	0.436294	0	0.167622	0.235407	0.0619134	0.0796359	5.0867	7.54217	0.65914	0.0393788
TCGA-49-4514	1700	0	1.01651	0.0496575	4.24562	3.71179	0.821839	0.0682502	4.47305	7.54184	0	4.87939	0	0	0.416278	4.33659	0.517899	0.0458556	0.614609	1.11346	0	0.0522199	0.243801	0.543474	0.211514	0.277968	0.603033	0.243347	0	0.253308	4.47985	0	0.136184	0.293241	0.280503	0.300616	0.226447	0.81239	0.214216	0.836795	0.0726426	0	0.698752	0.113093	0.872791	0	0.0785746	1.1739	0.269739
TCGA-95-7039	34	0	0.956315	0.26819	1.31027	0.0660877	0.114544	0.368605	0	0.609995	0.287659	0.201973	0.0313552	0.102922	2.47305	0	0.062157	1.83266	0.912829	2.40543	0	0.169217	0.411475	1.50021	0.342703	1.29582	0	0.648371	0.382697	0.547227	11.5542	0.10602	0.1471	0.633495	0.984709	0.162356	2.59275	0.109689	0.0771291	0	0.176547	0.0496089	0.0580587	0.0610791	0.0589221	0.152993	0.084873	7.12032	1.22372
TCGA-69-7973	230	0	5.20193	0.0652849	1.28611	0	0.255596	0.329005	0	0.131725	0.256756	1.26036	0	0.344494	0.0608091	0.751337	1.84091	0.944489	0.707025	1.08047	1.11335	0.137307	1.54253	0.688044	0.532983	0.519318	0.0880899	0.412352	0.284653	0.364742	12.9012	0.0860276	0.0895206	0.575718	0.691458	15.2983	3.19543	2.44762	0	0	0.222841	0	0.353328	0	0.0478109	0.0124142	1.99718	1.97863	0.189134
TCGA-55-8514	520	0	0.412944	0.0481042	0.758122	0.039513	0.256817	2.24792	0	0.370591	1.08352	0.138008	0.112481	0.023076	1.61303	1.27005	1.95105	1.82127	3.49788	3.54407	0	0.0505865	1.16612	0.175491	0.717143	0.0708614	0	1.43012	0.171607	1.99813	0.61996	0.380329	2.44059	0.340882	1.12088	0.47322	0.438728	0.196745	1.93681	0	0.158333	0	0.46862	0.0273888	0.158529	0.49395	0.190292	10.6283	0.261301
TCGA-55-7576	670	0	0.332279	0.0580613	1.60133	0.0397432	1.84952	0.239402	0.0425208	0.674499	0.207588	1.92254	1.48209	0.306377	1.83875	0.0786122	0.179421	0.732752	0.898279	1.33289	0.307292	0.203525	1.04522	0.847265	5.79117	0.912309	0.235029	0.347758	0.575356	0.366696	12.6496	0.153018	0	0.731452	1.59887	0.175745	2.06521	0.178102	0.139149	0	0.240653	0.0536999	0.167591	0.0220387	0	1.55673	0.214368	3.87135	0.841035
TCGA-50-5072	250	1	0.748653	0.274848	1.25887	0.0141101	8.38221	0.188878	0.905772	19.8633	0.1474	1.07805	0.401669	0.115366	0.432008	4.18647	0.79625	0.126902	1.9135	0.495229	0.0606101	0.578061	0.990972	2.84094	0.292676	0.809746	0.417214	0.942824	0.571955	0.0250362	13.726	0.0679076	0.0942199	0.470685	0.412395	1.76786	6.29812	0.80796	0.395219	0.206766	1.26902	0	0.074375	0.0391221	6.49137	0.881947	0.108725	1.31198	0.933106
TCGA-J2-A4AE	671	0	0.805043	0.261245	1.85275	2.21741	0.720607	1.19687	0	0.127785	0.700526	0	0.152716	1.35765	4.19752	0	0.252281	0.522694	0.606266	0.627625	0	0.0915752	0.855082	0.582426	0.695477	0.11545	0.352502	0.256046	0.103552	0.856697	1.84377	1.46306	1.67173	0.57595	7.99341	0.19769	0.238265	2.84929	0.688708	1.41503	1.67198	0.201351	0.0942587	0.0495812	0.334811	0.397415	1.48126	0.950128	0.0473026
TCGA-99-7458	392	0	0.508222	0.59006	0.636803	1.30652	0.123268	0.282083	0.112728	3.71285	0.275172	0	2.39952	0.332283	1.29038	0	0.594587	2.10846	0.158764	0.986144	0	0.134893	1.55871	0.561554	0.191232	0.120933	0.726944	0.452596	0.396591	0.205649	5.80973	0.152127	0.175893	0.284817	1.50352	0.0970677	1.91864	0.28855	1.9183	0.308798	0.103206	0.071183	0.33323	0.102248	0.14091	1.71231	1.64407	1.25961	3.2052
TCGA-NJ-A4YQ	886	0	0	0.0974638	0.864017	0.0400286	0.702453	1.54049	2.83723	3.01235	0.156809	0.48933	0	0.187017	8.17037	0	1.80709	0.0450009	0.376971	1.40491	0	1.17867	1.76452	0.651864	0.467036	1.03372	2.1699	2.81796	0.115898	0.426149	6.10105	1.34852	0.0668226	0.771238	0.412911	0.479395	0.666679	2.44157	41.2738	0.175971	2.99412	0.0450713	0.0527483	0	0.0535326	0.194598	2.7374	3.1016	0.211769
TCGA-55-8207	977	0	4.61247	0	0.668369	1.00407	0.226412	0.308583	0.0274041	1.5924	0.829485	0.196818	2.30412	2.60882	1.18505	0	0.404721	1.98115	0.385953	1.31852	0	0.734548	0.551156	0.0606725	0.159388	1.44788	0.302947	0.0896504	1.42391	0.672635	1.33196	0.0493091	0.513112	1.31995	0.123302	0.434185	5.98383	0.306092	0.0717442	0.300273	0.0638638	0.0922906	0.135013	0.0568147	2.87743	2.31967	0.236842	0.544373	0.487834
TCGA-55-8085	904	0	0	0.516739	0.82456	0.350172	0.275874	1.77554	4.1438	0.440743	0.360263	0.264068	0.166138	0.508161	1.19125	4.35525	0.479047	0	0.639566	0.662098	0	0.298872	4.55076	0.785475	0	0.639406	0.522932	0.666833	0.245789	0.112969	5.18501	0.817104	3.1177	0.469929	0.0547298	0.117308	1.43742	1.3209	0	0.124396	0.822065	0	0.223731	0.0147106	0	0.75169	6.07106	2.77202	0.729798
TCGA-86-8056	139	0	2.47803	0.648612	0.109523	2.53067	0.593619	0.382056	0.0254467	8.99517	0.695698	0.265832	0.473948	0.255583	3.85142	0	1.18113	0.962602	1.14684	0.408113	0	0.1218	0.781899	1.12678	0.222005	0.0477729	0.281308	0.302716	0.13773	1.50239	2.72954	0.228935	0.127056	0.694913	0.883248	0.192822	0.633812	0.473714	0.0999295	0.836477	0.330398	0.0856985	0.275813	0.131891	0.279914	1.11003	2.08929	0.526552	0.452989
TCGA-83-5908	824	0	0.353901	1.04211	2.48701	1.02719	1.70086	0.204614	0.0327077	0.671757	0.479041	0.918278	0.0696212	0	0.748799	0	0.0345035	1.31976	0.276389	0.906067	0.420221	0.31311	0.950189	1.59312	0.0951177	1.64915	0.120526	0.719824	0.17703	0.108488	12.8824	0.176556	0.0408278	1.29409	0.105118	0.157718	2.79702	0.517552	0	0.179193	0.544454	0.27538	0.290057	1.81392	0.0327077	0.203824	0.306236	0.758015	0.388164
TCGA-50-5049	2146	0	0	0.0442863	0.314078	1.69153	0.236433	0.0608679	0.0972981	0.49552	0.0475012	0.643212	0	0	0.12375	0.449711	0	0.122687	0.205549	4.18487	0.156258	1.16429	0.326146	0.107709	0.235794	0.182664	0.358537	0.17362	0.263312	0.0322727	5.29987	0	0	0.156914	0.187621	0.100537	15.5504	0	0	0.639671	0.113374	0	0.239681	0.05043	0	0.0757911	0.175189	3.46291	3.60844
TCGA-55-6987	2137	0	0.0891566	0	0.381244	0.314227	0.204233	0.587639	0.173038	0.367358	0.724094	0.177538	1.1576	0	4.74747	1.78237	0.625845	0.08312	0.626664	0.6127	0.158796	0.75725	2.75513	0.136823	0.0958501	0.0265188	0.910904	0.257309	0.107036	0.360767	7.08462	0.0444789	2.71538	0.457127	0.556119	16.8071	3.30428	0.138054	0.226507	0.297945	0.26335	0	0.38972	0.858426	0.0741591	0.128371	2.61711	1.69821	0.635623
TCGA-86-7954	605	0	0.405765	0.373079	0.458273	0.450659	1.90976	0.452441	0.482155	0.0966107	0.376624	0.181013	0.0128289	0.210552	0.950519	1.02512	0.203451	1.21594	0.135811	0.667831	0.619462	0.207704	1.23908	1.52117	0.210324	0.484919	0.177671	0.308297	0.104386	0.975547	4.44454	0.303645	0.481484	1.24931	0.232437	8.32005	2.58199	0.224394	3.9762	0.158493	0.152494	0	0.142527	0.0124952	0.0241078	0.125193	1.21539	1.87566	0.619889
TCGA-05-4434	457	1	0.722743	1.91105	1.1705	2.66856	1.76227	0.573072	1.64128	8.43837	0.279516	0.538921	0.507791	0.0416702	1.04374	0.670389	0.241589	0.770065	0.913865	0.639982	0	0.694246	3.55046	0.760558	0.240501	0.148434	1.19554	0.391631	0.144613	0.278528	7.70865	0.892829	1.21495	0.311884	0.0858695	0.31552	4.2623	0.444098	0.0749455	0.731902	0.158842	0.0160681	0.206855	0.029675	1.06874	0.327055	1.97928	1.59542	0.792714
TCGA-35-5375	264	0	0	0.771922	0.414732	0	0	0.0964494	0.770878	0.141591	0	1.00663	0	0	0.294137	0	0.650561	0	0.325706	3.14702	0.247601	3.76359	3.2946	0.0853359	2.01762	0.868333	0.284063	0.962894	0.166894	0.153415	6.07241	0.277413	0	0.381249	0	3.71719	3.84011	0.071753	0	0	0	0.0649033	0.0759583	0	0	0	0.610717	2.04176	2.89703
TCGA-55-6971	1400	0	3.55878	1.31448	0.0517903	0.215943	0.140353	0.270996	0.144397	5.78663	0.634455	0.436038	0.0384201	0.0945846	0.826442	0	1.52325	0.182075	1.01683	0.21053	0	0.552922	1.31089	0.559464	8.0485	0.135543	1.06419	0.300607	0.625236	0.19158	5.08223	0	1.08147	0.72966	0.510478	2.48673	1.91816	1.07523	0	0	0.288436	0.0607868	0	0.411628	0.0721984	0.224958	4.00387	2.03178	0.142804
TCGA-93-8067	186	0	3.89602	0.308366	0.0728977	2.27964	1.70117	0.197785	0.406493	4.47975	0.0441003	0.169564	0.0600872	0.0986171	0.201058	0.501015	2.14405	0.0569514	0.54069	0.62559	0.0725351	0.670175	0.466808	0.799975	0.0875648	2.02897	0.582516	1.81338	0.0244459	0.0898862	6.51008	2.64122	0.253704	0.262222	0.217735	0.777825	1.46246	0.168161	0.0295611	0.965041	0.157885	0.0190135	0.356033	0	13.9111	0.199366	0.309027	0.467293	0.98269
TCGA-62-8394	139	1	2.84	0.716809	1.27763	0.322432	2.64236	0.469141	0.187482	0.0751324	0.183059	2.88274	0.119721	0.31111	0.429214	0	0.039555	0.630408	0.264045	0.874712	0.30109	0.215371	0.209481	4.31687	1.27217	0.362029	0	0.111515	0.162359	1.04472	10.7464	0.337342	0	0.403138	0.192813	1.11068	1.15186	0.837635	0.0981657	0.246514	0.1498	0	0.295576	0.0388691	0.0374964	0.175248	1.64733	4.00357	0.222497
TCGA-55-7227	952	1	1.00445	0.0894776	1.07525	0.606352	0.262734	0.430429	0.0491461	6.6635	0.335906	0.0160441	1.3338	0.150231	0.125015	0	1.24426	0.908897	0.55373	1.64806	0	0.235237	2.00433	0.870473	0.333485	0.118627	0	0.716192	0.266002	0.815062	2.55346	0.265291	0	0.612932	1.64267	0.270839	0.775265	0.27447	0.25733	0.0538506	0.17998	0.206891	0.145278	0	0.0982923	1.78653	0.991081	1.91186	0.972082
TCGA-55-6983	2823	0	0.276987	0.197395	0.631911	6.19176	0.447884	0.101739	0	7.80724	0.0793969	0.0575162	0.0144239	0.071019	1.48239	0.902014	0.17156	0.205067	1.10705	0.553268	0.04353	0.389214	0.310428	0.480084	0.0262749	0.581558	1.29845	0.201528	0.176047	0.251733	1.68086	0	0.338343	0.35553	0.226492	3.06215	1.75531	0.227064	0	2.55418	0.207549	0.0228209	0.293788	0.0280974	0.514998	0.0563033	0.351387	0.76278	3.51161
TCGA-MP-A4TJ	339	1	2.46818	0.177989	0.467517	11.3062	0.443445	0.570806	0	0.489718	0.700004	0.0638298	0.0346823	0.227687	0.414466	0	0.687526	0.219149	0.734321	0.665167	0.209336	0.686302	1.6567	0.793625	0.063178	0.489425	0.960652	0.503957	0.493856	0.302647	3.27699	0.11727	0.732191	1.0791	1.92704	3.4121	4.70764	0.545976	0.0853134	5.21315	0.737729	0.0548729	0	0.0337802	0.0651744	0.643062	2.95719	0.323666	0.709011
TCGA-55-6642	2449	0	2.3703	0.153838	0.646529	0.189544	0.766548	0.140958	0	0.874755	0.440015	0.551688	0	0	2.14936	1.77046	1.18847	0.0473532	0.476011	0.246391	0	0.215701	1.35323	0.31179	0.109211	0.181292	0.622727	0.385317	0.487823	0.224212	5.09821	0	3.93767	0.508734	0.108624	3.56998	12.5807	1.25838	0	0	0.525105	0.0474273	0.0555056	0	0	0.0292529	0.811407	0.792619	2.72977
TCGA-55-6982	995	1	2.18596	0.306517	1.64244	1.83795	4.28742	0.337026	1.01014	1.057	0.197261	0.0439688	1.36177	0.411708	2.56953	0	0.14208	0.735929	0.474219	0.294556	0	0.709135	0.451468	2.83282	1.37088	0.018061	0	0.520723	0.510286	0.0893473	7.78783	0	0.252183	0.448897	1.03886	0.649455	6.48568	0.501458	0	0.6641	0.381136	0	0.33178	0.17452	0.134685	1.32891	0.533512	1.17052	4.52879
TCGA-05-5423	151	0	1.60814	0.298204	0.626627	1.91875	2.12272	1.29788	0	0.227911	0.0533088	0.0178235	0.319589	12.6839	10.416	0	2.24618	1.83582	0.153786	3.42289	0.263043	0.209062	0.625285	0.241754	0.529246	0.366066	0.804743	0.243558	0.65011	0.289747	1.7386	0	0.885965	0.211317	8.63297	1.12829	3.445	0.0508186	0.929077	0.239292	0.0727058	0	0.484173	0.0565956	0	9.58313	0.747108	4.24781	0.485953
TCGA-62-A470	1194	1	0.0615026	0.838246	0.0733931	1.64484	0.397795	1.53614	12.073	7.94409	0.998999	0.400812	0.0544459	0.312755	1.43143	5.48557	4.10138	0.516045	2.16145	0.596692	0	0	5.05864	1.47239	0.0991799	1.20736	0	0.304283	0.110754	0.135746	4.45846	0.736386	4.08685	0.68201	1.31529	0.42288	0.254837	1.52373	0.133929	1.56951	5.65436	0.0861421	0.100815	0	0.102314	0.425057	3.16858	0.931528	0.202371
TCGA-69-7765	165	0	3.09894	0	0.493076	0.0917818	0.190893	0.245719	0	1.59046	0.479397	0	0	0.171525	12.7391	0.181545	0.725112	1.48583	0.276595	0.930603	0	0.611018	0.617168	0.706569	0.713913	0.0131679	0	1.5916	0.106297	0.293136	3.86759	0	0.183862	1.03463	2.58783	0.676435	6.27759	0.411303	0.192809	0	0.261533	0.0826754	0.435409	0.101791	0.147294	0.407951	0.671862	1.54425	1.94226
TCGA-91-6849	35	0	0	0.281893	0.222132	1.07091	0.18812	0.193719	0.464494	9.44938	0.377946	0.164274	0.411965	1.45368	2.3631	0.286252	1.55165	0	1.52643	1.46733	0	0.592878	0.605499	0.171398	0.6754	0.892789	0	1.19723	0	0.154068	1.2975	0.139297	0	0.366224	0.447846	0.479958	0.257097	1.22499	0	0.508957	0.3866	0.0651794	0.152563	0	0.0774157	0.160809	0.780583	1.02522	0.153124
TCGA-44-7660	325	0	0	0.581404	2.49569	0.138243	0.114357	1.26172	6.6221	0.353612	1.93648	6.67752	0	0	0	0	0.0354602	0.11303	0.378738	3.72477	0	0.193075	2.15026	0.669804	0.716872	2.18171	0	0.209939	0.363878	0.602081	14.9861	0.30242	0.12588	0.773407	0	5.53425	2.03732	0.782211	0	0.110497	0.0559552	0.0283016	0.529955	0.052268	0.168074	0.122194	3.53463	1.36331	0.731367
TCGA-78-7537	1622	1	0	0	0.852513	0	0.0128352	0.0330431	0.0264099	0.90843	0.128934	0.0991495	0	0.219125	3.25822	0	0.529338	0.0222009	0.148781	0.6931	0	1.21354	0.509029	0.380064	0.128005	0.0495812	0	0.369155	0	0.210237	0.973795	0.0950405	0.0329665	0.35209	1.49385	0.291084	0.460462	0	0.0345707	0	0.993543	0	0.130115	0.0136884	0.13205	0.0411444	3.06235	0.480905	1.04475
TCGA-55-7725	442	0	4.6715	0.285836	0.506786	0.35218	0.0381501	0.392858	0.156997	0.0655373	1.53293	0	1.838	0.58275	3.39455	0	0.165616	1.91365	0.110556	0.686702	0	0.375731	6.49052	0.34759	0.0760941	0	0	0.350184	0.169949	0.468668	2.36816	0	0	1.80609	1.41279	0.162224	0	0.292264	0	0.172025	0.287472	0.0660911	0.309393	0.0406861	0	2.56817	6.89736	0.779671	0.155265
TCGA-86-7714	625	1	14.6904	0.50235	2.00753	0.0884212	0.153253	0.295903	0	1.26369	0.538818	0	0.461464	0.757369	0	0	0.249486	0.463889	0.111028	1.60915	0	0	0.550528	0.436345	3.13319	0	0	0.187563	0.170675	0.104594	1.71765	0.283697	0.590432	0.423788	0.709412	0.0543056	0.78542	0.220135	0.103194	0.17276	0.052491	0.0663735	0.155358	0.77634	0.630672	0.36845	2.10076	0.522002	0.467787
TCGA-55-6979	237	1	1.5816	0.342163	1.48294	0.0468424	0.152227	0.470275	0.187935	0.324269	0.183501	0.940741	0	0.109426	1.59353	0	0.330422	0.895238	0.44114	0.639354	2.11273	1.01949	0.542469	0.693479	5.70827	0.0168011	0.461686	0.167677	1.15282	0.581804	11.1294	0.225439	0.390987	0.5927	1.208	1.16515	4.785	0.233239	2.13207	0	0.417117	0	0.123454	0.129877	0.0626451	0.0975958	3.47408	2.54069	0.557588
TCGA-55-8090	598	1	15.2769	0.0857648	0.608244	0.942236	0.938648	0.294692	0.117767	12.66	0.275973	0.00384459	0.188008	0.102855	0.539223	0	1.04356	0.574189	0.431238	1.16759	2.26957	1.26267	0.28291	0.547545	1.80373	0.0884369	0.173586	0.742513	0.152979	0.593744	2.92121	0.508565	0	0.703986	0.30279	0.535426	1.07553	0.482316	0.277484	0.309697	0.486169	0.138814	0.116042	0.256365	0.164874	0.574877	1.34012	1.01374	0.302818
TCGA-99-8028	1118	0	2.62263	0.125092	0.874831	3.31372	0.417397	1.11754	0	0.682619	0.234803	0.29159	0.182813	0.24003	0.917563	0	0.471119	1.50169	1.54826	0.601052	4.19301	1.05238	0.441427	0.076059	0.0999046	0.294833	0.506366	0.286073	0.409066	0.387423	2.76372	0.247255	0.17153	0.930766	2.34066	0.212985	3.13744	0.927315	0.224846	1.43041	0.320239	0.115695	0.0677009	0.961509	0.103061	1.53425	2.02885	1.50702	0.509624
TCGA-95-A4VP	605	0	0.91874	0	1.57241	0.105261	0.371397	0.402581	0	0.42982	0.0392718	0.085347	0	0.0526917	0.0511554	3.94108	10.4799	0.710021	1.41615	0.410491	7.75119	0.154012	0.79769	0.0890483	0	0.226527	0.444632	0.203349	0.304771	0.320179	2.22454	0.289482	0.25103	0.18162	3.30915	14.2688	0.768042	0.561559	0.579139	0.0881415	0.656125	0	0	0	0.56309	0.45951	2.02773	0.732388	0.159108
TCGA-50-5935	653	1	2.05702	0.150732	1.5045	0.0619057	0.536479	0.276224	0.110387	0.506883	0.0538913	0.279283	0.146855	3.83228	1.12318	0.102042	1.33915	0.742353	0.544133	0.724247	0.354557	0.264183	0.508778	0.305495	1.71209	0.606909	0	0.262635	0.119493	0.256299	1.29507	0	0	0.45099	2.55433	0.57031	1.09978	0.359617	0.288994	0	0.128626	0.0929394	0.380694	0	0	0.917193	0.596267	1.78165	0.764187
TCGA-44-6147	441	0	0	0	9.60749	4.26924	0.259328	5.07391	0	0.196017	21.5698	0.54001	0.113581	1.30489	16.4237	1.77573	0.788053	0.807402	8.7175	0.311194	0.171389	1.73676	2.65314	3.89857	0.310353	3.23426	2.35953	0.507819	1.50181	1.27432	5.72364	0.192024	5.19535	7.22854	1.30333	0.220545	3.54415	0.397337	1.11757	1.75403	28.5655	15.6342	43.0089	2.37847	0.10672	0.332521	6.5332	1.05997	0.527714
TCGA-64-5775	62	1	0	0	0.817366	0	0.0190955	0	0	0.577347	0.0383644	0	0.125453	0	0.0499734	0.79906	0.0414486	0.099088	0	0.34372	0.0631008	0.789883	0.428044	0	0	0.0316133	0.434358	0	0.127598	0.0781952	17.1876	0	0	0.13518	0.479853	0	0.391459	0.0731445	0	0	0.196214	0	0.0774314	0	0	2.71376	0	0.0325212	0.233148
TCGA-97-A4M6	568	0	7.54049	0.602993	1.63336	0.294085	1.24745	2.74528	1.49039	1.98397	0.40423	0.0473032	0.0440614	0.632757	0.737169	0	0.742435	1.21806	0.174919	0.482884	0.0664867	0	1.35304	1.28322	1.24408	0.677296	0.762776	0.554056	0.224075	1.8126	1.31834	0.0744918	0.103355	0.320476	0	0.370742	0.412464	2.0038	0	0.226813	0.082697	0.0697122	0.163172	0	0.496797	1.97792	3.01148	2.09024	2.16998
TCGA-44-2668	246	0	0.0467521	0.212402	2.4548	0.901416	0.415786	1.07041	0.233326	0.0779202	7.5181	1.09178	3.14548	0	0.79136	0.143791	0.246136	4.11893	0.985833	0.226792	1.62376	1.04236	5.77896	16.1862	0.150786	0.521475	0.859791	3.16888	0.420957	1.08349	19.5529	0.559774	0.388336	13.6801	0.54991	0.107153	10.5899	0.289572	0.203616	0.255661	22.76	3.86345	26.1328	3.34584	0.233326	1.1309	2.91278	0.257496	1.07685
TCGA-44-2659	529	0	2.53535	0	0.507386	0.0979433	0.0254635	0.196661	0.523942	0.38494	0.204632	0.342088	0.0836442	1.4872	4.79797	2.13106	0.248718	1.01301	2.4351	1.98615	0	0.200627	0.52688	0.0580002	0.0507893	0.0140519	0.289604	0.101284	1.92836	1.89427	2.01971	0	0.850221	0.704139	0.875616	0.126323	2.45776	0.29261	2.88053	0.0287048	0.218039	0.0661692	0.258133	0.176515	0	0.244877	4.05652	1.10584	2.17629
TCGA-L9-A5IP	58	1	0	0.0963644	0.21515	0.0659617	2.16076	0.0441483	3.63444	28.2223	1.72267	0.0115193	0.187772	0	0.269274	2.47898	0.0372231	0	1.83874	1.90352	0.113336	0.067558	1.14336	2.46086	0	1.36274	3.77075	5.85569	0.0763935	0.0936315	3.66665	1.46029	3.65581	0.311085	0	0.559062	1.25973	0.722566	0.508082	0.0386635	0.246695	0.118834	0.208613	0	1.55258	0	0.355787	0.408882	1.11669
TCGA-44-7670	531	0	0.395841	1.59854	0.0885693	9.33496	3.7604	0.205975	1.48164	0.952949	0.0267905	0.622529	0.0146009	0.0958542	0.0697946	0	0.20261	0.276779	0.2705	0.400042	0.132193	0.787983	1.26462	0.880833	0.744727	0.485674	1.41549	0.408003	0.0297013	0.236622	19.4981	0.148109	0	0.212396	0.370362	0.642628	0.706185	0.587397	0	3.03649	2.10096	0	0.243322	0.0142211	0.0548757	0.128237	0.375461	1.52158	0.189946
TCGA-44-2656	582	0	1.8727	0.23918	1.17123	0.617456	0.255384	0.469619	0.187673	1.17201	3.18846	0	4.83368	0.590073	13.7011	0.208181	0.118786	5.80566	0.951531	0.273626	3.19481	1.90438	2.42197	1.28807	0.327464	0.241598	1.65975	3.88467	0.975144	0.0995985	6.16503	0.202611	0.187412	1.63841	4.58397	1.34452	2.39955	0.34937	0.147399	0.0411275	4.87346	2.02252	2.55194	0.330724	0.0750692	1.46189	0.702856	4.16299	0.222724
TCGA-78-7155	1171	1	0	0	1.50602	0	0	0.713445	0	0.0259676	0.658004	0.00846154	0	0	0	0.575036	0.109369	0	0.511059	0.302322	0.0832514	0	1.91141	0	0.0502509	0.361476	0	0.20042	0.168346	0.447053	31.7989	0.18655	0	0.334403	0.233243	0	0.301273	1.01328	0	0	0	0	0.868346	0	0	0	0.59736	0.901037	0.205068
TCGA-55-7911	537	0	9.03602	0.156836	1.03504	0.0322065	5.92398	1.5628	0.129215	10.8383	0.588777	0	0.0687614	0.432605	0.164345	0	1.63571	3.36727	0.121322	1.44436	56.0292	0.206162	2.94771	0.858244	0.0835048	0.947234	1.42845	0.858244	0.0466249	0.571457	17.3975	1.47251	0	1.88937	1.52269	0.415386	1.10857	0.240546	0.225524	0	1.53432	0.326375	0.509288	0.267891	0.129215	1.52098	2.45065	1.42601	0.212983
TCGA-38-6178	448	0	1.09937	0.13319	0.472291	0.191455	0.533301	0.366117	0	0.549687	0.0714294	0.0597051	0	0.606976	1.20957	0.676248	0.771718	0.307481	0.206061	1.81322	0.117485	0	3.0448	0.89081	0.212744	1.51074	0.539145	0.413374	0.475142	0.339708	4.04611	0.921416	0	0.833714	0.282133	0.201575	4.00864	0.272371	0	0.0801581	0.14613	0.184778	0.0720835	0.151667	0	0	1.2645	1.63485	0.50644
TCGA-78-8662	3361	1	0	0.361993	2.13938	0.148671	0.0552169	2.98518	0	0.0284568	1.05388	6.28684	0	0.0248073	2.38431	3.36083	0.779046	0	0.160013	1.49086	0.0912315	0	2.22158	0.0628859	0.110135	1.09696	0	0.456158	0	0.678331	7.80726	0.51108	0.780019	0.525256	7.12031	0	0.377316	0.846023	0.0743615	0.0622455	0	0	0.72768	0	0	0.177003	0.0818275	7.52309	0.561812
TCGA-55-8301	534	0	0.0656465	0.132552	0.691987	0	0.300756	0.364364	0.14561	0.255292	0.213262	0.160432	0.0193715	0.445103	5.23181	0	0.115203	0.765022	1.12791	0.902269	0.175384	0.34848	1.11854	0.282082	0.2823	0.00976299	0.402422	0.692875	0.157622	0.410527	7.26032	1.6375	0.908796	0.407033	1.02953	0.100305	2.68985	0.50825	2.4302	0	0.0727149	0	0.286953	0.0943379	0.109208	0.09452	4.29969	3.82652	1.47604
TCGA-55-7816	468	1	0.268993	0.0581941	0.263677	0	0.0621368	0.239949	0	1.18485	0.374512	0.0365214	0	0.237287	0.447186	0.059094	0.101155	2.44511	0.630233	0.652436	0	0.244788	0.696425	0.141534	0.154922	0.462913	0	0.114072	0.207602	0.424078	2.83927	0.115026	0.119696	0.481113	0.0821809	0.176147	0.928815	0.148757	0.0836805	0.245162	0.0957718	0.0538227	0.157476	0	0.351598	0.0497964	1.54238	0.158736	0.34772
TCGA-62-8398	444	1	5.18301	1.36632	0.412337	0	3.05745	0.279686	1.0219	24.4113	0.530077	0.0156378	0	0	0.44678	0	0.808505	0.0268449	0.764587	0.605283	0	0.91712	1.58783	3.42907	0.340519	0.419669	0.706057	0.664815	0.172844	0.105923	7.81428	1.14921	0.597937	0.769081	0.123159	3.54174	2.20062	0.416142	3.6786	0	1.14822	0.0268869	0.157333	0.0496553	9.06938	0	0.551991	0.766525	0.694809
TCGA-MN-A4N4	1175	0	0	0.403931	2.14128	0.0301628	0.0980222	4.59277	0.080677	0.222275	0.708962	1.94239	0.042932	0	2.20613	3.65431	1.10638	0.305186	0.852177	0.8822	0.25913	0.347543	1.54371	0.401891	0.234618	1.07104	0	0.563847	0.785992	5.35194	2.50149	2.25005	0.302118	0.919434	0.103714	2.22301	6.83215	0.225281	23.1806	0	0.0940067	0.0679253	0.119242	0.0209076	0	0.167584	0.871571	3.80622	2.43351
TCGA-44-3918	197	0	2.46669	0.0565986	0.156099	0.0232452	1.20866	1.24464	0.0621743	4.57313	0.121415	0.0202972	0.0496288	0.461564	1.9374	0	1.0822	1.98608	0.17513	0.498574	11.1832	0.327356	0.929161	0.447374	0.301349	0.0166749	1.03099	1.67341	0.471124	0.16498	8.75321	0.671233	0	0.42113	0.499549	8.52306	9.75619	0.694459	0.0406932	0.136252	0.620974	0	0.091895	0.322252	0.0621743	0.0322874	1.94788	5.35196	1.53721
TCGA-44-8119	285	0	0.199779	0.132362	0.774811	0	0.06057	0.20791	0	0.478638	1.11549	0.0881536	0.0221071	0.00907075	0.264188	1.22888	2.60754	0.0349224	1.25794	0.575415	1.30099	0.954462	0.510599	0.183953	0.0805417	0.183839	0	0.833967	0.539646	0	11.2796	0.224251	1.27049	0.710172	0.0934601	1.98892	18.815	0.657362	0.462233	0.06828	0.255867	0	0.716356	0	0.0415433	0	0.239361	1.44417	1.08876
TCGA-55-8091	600	0	4.72955	0.138269	0.414034	5.6106	1.12204	0.342072	0.698697	1.01956	0.444921	0	0.0484968	0.212252	0.193185	0	0.672965	0.638415	0.0855677	1.28444	0	0.34897	0.933426	0.369913	0.853981	0.0325891	0.223883	0.243932	0.39461	0.201522	3.30942	0	1.40303	0.444186	0.0781048	0.460378	6.48189	0.67862	0.755536	1.36473	0.475335	0.0767297	0.29933	5.30611	0	0.0473265	2.86612	0.955462	2.1631
TCGA-78-7152	1202	0	0.931908	0	1.19548	0.260824	0.18836	0.0969834	0	9.99212	0.151372	0	0	0	1.57741	0	0.245311	0	0.32751	1.01714	0.124486	0.296818	0.67123	0.686467	0.751403	0.0415781	0.285636	0.599378	0.335637	0.102843	3.11797	0.139475	1.06434	0.400028	4.03576	0.320381	0.579207	0	0	0.509607	0.335481	0	0.152758	0.0401762	0.0775146	0	0.669926	0.962374	0.459958
TCGA-86-6851	179	0	0	0.822345	0.84241	0.0192994	0.225787	0.322928	0.180671	0.836084	0.882044	0.421295	0	0.033813	0.295444	0.190871	0.0544545	1.90931	0.436206	0.978409	0.0414504	0.049416	0.951681	0.571436	3.37765	0.235354	0.570653	0.3838	0.223515	1.14717	6.79154	0.185764	0.837664	1.38748	0.0663603	0.106678	2.01431	0.168168	0	0.0565617	0.111706	0.217307	0.203456	1.47153	0.206482	0.174244	2.39796	0.982693	0.0510511
TCGA-55-8205	599	0	0.174256	1.50417	1.48681	0.368492	0.845305	0.326425	0.405841	1.66995	0.90575	0.605665	0.339376	0.012659	0.516176	8.46786	0.275221	0.852899	0.204134	2.78951	0.512103	0.360759	6.13794	2.50304	0	0.0699715	0.106821	0.413821	0.40794	0.192304	21.5233	0	0.0723707	0.542303	0.72669	0	3.63422	0.242842	0	0.254108	0.752771	0.0488134	0.142819	0.0300499	0	1.68604	0.584584	1.22368	0.401364
TCGA-78-7148	626	1	2.27147	0.0362092	1.11278	0	0.753917	0.0497666	0.238658	12.699	0.0388378	0.305153	0	0.243178	0.708262	0.514768	17.4554	0.100311	0.72826	0.637929	0	0	0.233329	1.01274	1.23385	0.202688	4.69033	0.449522	0.17223	0.131934	4.59992	0	0.297907	0.273696	1.04825	1.31521	0.264193	0.148094	0.781009	0	3.49598	0	0.11758	0.0206162	22.4338	0.0826241	0.401064	0.52676	0.472051
TCGA-55-8087	462	0	0.0151444	0.504557	1.24699	0.141288	0	1.22934	0.0251938	0.0420678	0.541185	0.135707	0.201101	1.11118	0.448604	0	1.86038	0.550641	0.709646	0.844844	0	0	0.598188	0.753013	0.268643	1.04055	0	0.502009	0.0818163	0.33426	0.886726	0.498651	0.408828	7.69265	0.097163	0.503294	0.230087	0.0938009	0.131915	0.165632	0.0335501	0.0424233	0.0992984	0.0261161	0.226744	0.654162	1.10684	0.667285	0.274075
TCGA-49-4486	2318	1	0.0129805	0	0.387252	0.0484402	0.514237	0.135088	1.4252	0.0504798	0.0632535	0.109267	0	7.3647	2.44436	0	0.410032	0.381201	0.638662	2.04645	0.0346793	0.0206718	0.753996	0.119522	0.418651	0	0.795724	0.443124	0.0233754	0.042975	0.217151	0.116564	0.0269549	0.0325032	1.19368	0.163628	0.0179283	0.723585	0	0.0709831	3.71676	0	0.0638328	0	0.021594	0.078497	0.0933138	1.4656	0
TCGA-44-7661	366	0	4.69739	1.39861	0.313531	0	5.08519	0.265142	0.0264896	2.82639	0.310375	0.272402	0.775299	0.254489	0.370604	0	0.223551	0.556695	0.0746147	0.733812	0.340332	1.85116	1.54649	1.08498	0.0770346	0.106566	1.26896	0.449049	0.0286748	0.158154	18.8243	0.238318	0.0330659	0.8544	0.970525	0	9.36898	1.89854	0	0.0290253	0.16756	0.0223027	0.287116	1.29059	0	2.68245	0.190782	1.73209	1.0217
TCGA-MP-A4T6	1790	1	0.0398609	1.29784	1.43891	0.210731	1.53079	3.06975	0.0331557	0.426291	3.46396	0.162358	0.0352874	0.854244	5.60856	0.183894	4.47693	2.11823	0.887219	4.78574	0	0.412617	0.703879	0.844174	0.610662	1.89404	0.733059	1.08466	0.107673	1.56163	1.05582	2.38632	1.86241	2.78047	0.575412	1.2105	0.302802	1.60478	0.347207	0.508613	0.3753	0.642048	0.228689	0	0.298401	0.447666	8.42936	4.96713	0.16395
TCGA-62-A471	1246	0	1.7269	0.454817	0.627192	0.0622647	1.5783	0.312554	4.16352	23.5607	0.162611	0.237861	0	0.0181816	0.0529544	4.6185	2.59134	0	4.74968	0.971261	0	0.358714	1.82594	1.75142	0.0807197	1.40696	0.153423	1.37444	0.0450699	0.303819	7.53635	0.0749154	1.14337	0.456589	0.160571	1.11855	0.553079	1.58891	18.0942	0	0.471281	0	0.123075	0	23.0242	0	0.929573	0.6203	0.0823519
TCGA-91-6828	323	0	3.48679	0.34739	1.31397	0.0570695	0.556389	0.095492	0.152645	0.407812	0.81974	0.261618	0	0.0666583	0	0	11.0303	1.28317	0.429964	0.890223	0.122572	0.0730632	0.618268	2.02773	0.221954	0.102347	0	0.635557	0.0826188	0.810092	6.90755	0.274659	0.476352	1.47703	0.686812	6.6771	2.21783	0.852489	0	0.0836284	0.914737	0.192777	0.0752043	0.0395583	1.37381	0.753059	0.329811	1.13709	0.226442
TCGA-MP-A4T9	1265	1	1.38127	0.809718	0.890622	0.110851	0.540361	0.510075	0	3.70072	0.506625	0.756193	0.0788894	0.50172	1.46127	0	0.195483	0.934655	0.104394	1.72915	5.35683	2.90929	0.921391	0.615411	0.251487	0.298195	0	0.264535	0.361074	0.417963	7.2676	0.133373	0.0925258	0.884597	2.69193	0.051061	3.66169	0.241479	0.194056	0.0406096	0.259112	0.0624078	0	0.0960467	0.0741238	2.19409	1.68163	1.41109	0.293225
TCGA-50-6594	370	1	0	1.47462	0.826807	0	0.756983	0.389758	0	0.114435	0.0608334	0	0.0331545	0.625764	0.158483	0	0	4.13753	0.26324	2.54346	25.8148	0.65607	1.4967	0.620726	0.181185	2.37275	0	2.11232	0.337215	0.165323	13.5748	0.112104	0	0.723436	0.400468	0	4.29336	0.115983	0.0815552	0	1.76308	0.104911	0.122781	0.0322921	0	0.58238	2.87179	2.78467	0.246465
TCGA-73-4668	467	0	0.194276	0.110328	0.0289794	0.00755197	0.15707	0.429637	0.0201994	1.167	0.216951	0.837467	0.128989	0.00882085	1.7213	0.933616	0.234393	0.950888	0.8819	0.736266	0.259517	0.42541	0.942283	0.178885	0.215388	0.76927	0.0744335	0.264323	0.218658	0.214398	8.63289	0.436145	0.0756424	1.05111	0.207738	0.222633	2.19694	0.789665	0	0.022133	0.235368	0.0340134	0.238842	0.0418778	0.0403989	0.062938	0.567369	1.78892	0.759112
TCGA-73-4659	711	1	3.75419	0.235578	0.495027	1.01912	0.134154	0.172684	0.051757	14.7437	0.202144	0.430858	0.0275423	0.203415	1.51405	1.08447	0.709782	0.15953	0.631743	0.704307	0.609548	0.231218	1.81201	0.11459	0.117067	0.356279	0.127147	0.595182	0.0747023	0.228897	7.57577	0.341469	0.172283	0.367264	0.787342	4.3616	4.61223	2.02336	0	0.340268	0.23549	0	0.0679982	0	0.120766	0.0268777	0.782799	1.07097	0.66542
TCGA-93-A4JO	33	1	0.0795732	0.321345	1.17114	7.01128	0.321671	2.26352	0	0.162094	0.73243	1.51972	0.21133	0.0578069	0.617336	0	0.325834	1.0015	0.559304	3.28105	0	0.126722	5.43565	0.928082	3.37912	0.828392	0.162598	1.98156	1.05084	2.693	3.25399	0.555771	3.19462	1.45169	0.879235	0.121584	0.732696	0.287501	0	1.69222	0.190972	0.297206	0.695659	0	0.132376	0.710348	1.08051	3.36003	0.392747
TCGA-55-6985	1233	0	1.08733	0	0.800158	14.54	0.586067	0.377196	0	0.493328	0.470981	1.10229	0.0320859	0.105321	1.30369	0	0.318028	0.405485	0	0.703281	0	0.461763	0.387379	0.867705	0.467587	0.0970254	0	0.555889	0.979039	0.239991	7.07389	0.325473	0.150528	0.609362	0.155024	1.37065	1.90228	0.392858	0	5.81388	0.240882	0.20306	0.178235	0.0937538	0.180886	0.0626232	0.390829	1.44727	1.78891
TCGA-86-8669	938	0	0.0329307	0.748044	1.88627	0	0.505859	0.0685417	0.547824	11.9099	0.21396	0.0268261	0.0291523	0.430611	0	0	2.83171	0.690772	1.15732	0.95847	0.175958	0.052443	2.20358	1.21288	0.212418	0.102847	0.807478	0.391018	0.118603	0.0363415	3.85627	0	0.75221	0.200256	0	12.9439	0.318381	0.40793	0.215131	0.0600264	14.244	0	0	0.0567879	0.766954	0.426732	2.84077	0.816174	0.216713
TCGA-50-5932	1235	1	1.87577	0.126251	1.54203	0	0.404413	0.0433803	0	0.856836	0.16927	0.0622539	0.0922529	1.36268	9.48112	0	1.13384	0.0582923	0.244156	0.808826	0	0.464679	0.677958	2.18776	0.10083	1.56221	0	0.433084	0.412855	0.230007	4.12586	0.124773	1.12527	0.514426	1.22574	0.0955367	0.489368	0.0968177	0	0	0.288576	0.116767	0.17082	0.0179707	0.034672	0.720214	0.299655	0.573955	0.0685792
TCGA-44-7671	535	0	3.14865	0.0230351	0.408412	3.89775	0.233659	0.0633197	0.910956	1.48728	0.0247073	0.0495645	0.282778	0.397804	3.70113	0.233913	0.640646	0.191443	2.28083	0.700978	0.081276	0.557145	1.44902	0.252106	0.392468	0.0203595	3.91628	0.466584	0.0547836	0.0671454	1.39954	0.0910617	0	0.14147	1.34999	0.383485	1.70172	0.0942126	0.19874	0.887249	1.28892	0	0.0249336	0.0131153	0.0253043	0.157688	0.0728981	1.02626	1.15116
TCGA-55-7910	1040	0	0.174482	0.660581	1.79585	0	0.811136	1.54345	0.0725656	0.278686	0.637682	0.0355343	0.0772311	0.22182	0.0922939	6.5738	1.45444	0.244002	11.3442	1.2696	0	0.277867	0.668915	0.562309	0	2.53003	0	0.604272	0.314208	0.144416	5.2297	0	4.07613	2.91788	0.13993	3.29918	1.02421	0.878069	0.379954	0	0.676441	0	1.00103	0.0752222	0.870788	0.0753674	4.54686	0.660682	0.0717653
TCGA-38-A44F	133	0	2.90807	2.52899	0.566929	17.0663	6.23869	1.37837	0	0.959759	0.32738	0.00781842	0.433315	0.648421	0.121842	0	0.151585	0.120795	0.742054	0.768197	0	0.0917065	1.00349	0.583261	0.325021	0.629465	0.529511	0.370375	0.466651	0.6355	1.1239	0.430928	0.0597901	0.350185	1.81649	0.0329955	0.278374	1.51585	0	8.50237	0.0159465	0	0.0471969	0	0.670582	1.54219	3.03577	0.277518	0.710557
TCGA-55-A492	596	0	0.206467	0.104223	0.20532	0.0428047	0.704802	2.67393	2.4043	19.6844	0	0	0.203086	2.0832	4.70828	0	0.442847	0	1.18247	2.8934	0	0	0.223869	0.168988	0.221967	0.501529	11.1098	0.238348	0	0.151901	0.127925	1.78539	0.047638	0.0820623	0.294365	0.341762	0.158426	0.745972	0	0.0418167	6.02238	0	0	0	0.152654	0.237822	4.86501	2.27431	0.188713
TCGA-MP-A4TF	336	1	3.29987	0.113574	0.850218	0	3.12268	0.858543	0.0623815	14.187	1.09637	0.0101824	0.0663921	0.0544825	0.317364	0.115331	0	0.157318	1.40571	1.18237	0	1.07491	1.27205	0.897728	0.0604707	2.29207	0.919486	1.948	0.27011	0.786268	6.58678	1.12245	0.0778683	0.804826	0	0.687554	1.9163	1.21935	0.65326	0	1.20455	0.0525215	0.24587	0.226328	0.499052	0	3.63917	0.258163	0.308467
TCGA-55-7570	824	0	0	2.86689	0.864596	0.0145362	0.321229	0.486457	0.544326	23.1964	0.303705	3.1605	0.0206901	0.0169786	0.197803	10.9979	0.123045	0.0326838	1.04041	0.680249	0.0624408	0.5583	2.42193	0.215202	0	1.42857	0.429815	1.97729	0.168351	0.283717	19.3537	0.909463	0	0.643749	0.174939	0.187482	2.64699	0.253328	0	0	0.245938	0.13094	0.344797	0	0.233282	0.100954	2.32418	0.707982	0.269161
TCGA-53-7624	1043	1	0	0.970711	1.28903	0.0147657	0.575821	0.790615	2.29065	9.47643	0.501309	1.46981	0.0210166	0.0862329	0.100462	6.71751	0	0.199198	2.61426	0.575821	0.253705	0.264652	0.364059	3.41014	0.153137	0.857962	0.436598	0.258403	0.0427521	0.0785985	13.5695	0.639566	0.0492988	0.288739	0	0	2.19692	1.21311	0	0.0432745	0.0525935	0.0332516	0.272408	0.0204699	0.0789881	0.123057	0.711104	0.8826	1.24987
TCGA-97-8174	164	1	0.415726	0.209856	0.571266	0.0783529	0.213889	0.0786627	0.0838289	1.06731	0.532032	0.017104	0.0111523	2.48928	2.7721	0	2.89612	0.281874	0.295157	0.244444	0	0.381183	0.380516	0.185596	0.101576	0.753164	0.38613	0.168283	0.317605	0.250246	1.51036	0.678761	0.18312	0.621881	20.7179	0.0866196	0.782985	0.175562	0	0.0688899	0.279084	0	0.165201	0	0.0838289	0.141481	1.38862	0.555076	0.248713
TCGA-49-6744	890	0	0.338676	0.512885	0.575141	0.0324066	0.505507	0.271122	0.0433393	1.80917	0.211584	0.162706	0.461257	0.586698	3.08682	0.881381	0.228593	0.400753	0.183114	1.0742	0.278406	0.622327	0.702159	0.431788	1.72248	0.058117	0.479107	0.219116	0.140744	0.718759	3.34131	0	0.108197	0.698937	0.390002	0.179128	5.46931	0.2017	0.0567312	0.0474878	0.0721427	0.0364891	0.469747	0.112315	0.0433393	4.61379	0.96762	0.753303	1.92876
TCGA-86-8279	482	0	0	0.0233207	1.29556	0.0287335	0.0498013	1.28209	0.0512361	0.213881	0.650355	0.476701	0.218121	0.570543	2.34596	1.79978	0.324295	1.39979	1.01024	0.709669	0	1.03001	0.837256	1.58811	1.09267	0.302308	0	0.251422	0.38824	0.288906	4.42243	0.276572	0.031978	1.84538	0.823329	4.28829	4.08371	0.309988	2.17972	0	0.0682303	0.0647067	0.151456	0.013278	0.0256181	0.359197	1.05168	1.46307	3.09093
TCGA-44-6774	361	0	0.610104	0.395971	0.312025	0	0.0704663	0.18141	0	0.23	0.070786	0	0	0	0.184412	0	1.37658	0.426596	0.204205	0.634197	1.97926	0.208202	1.51881	0.24076	0.210828	0.155546	0	0.237166	1.17716	0.144278	4.49568	0	0.0904944	0.280598	0.37279	0.749099	13.001	0.134959	0.0948981	0	0.965423	0	0	0	0.0724965	0.0376478	0.313278	0.660053	2.50939
TCGA-49-AAR4	879	1	1.14837	1.22758	1.16887	6.97437	0.546148	1.33571	0.224753	0.5254	0.603488	0.357689	0.448505	0	1.71514	1.24657	1.36328	0.519566	0.316537	0.737299	13.8964	0.43031	0.84755	0.746402	2.12422	1.13021	1.03525	1.15302	0.851529	0.969126	7.81629	0.707709	0.631238	0.483282	0.108349	0.46447	3.59206	1.20289	0.294202	3.01677	0.224475	0.0946143	0.44292	0.0582452	0.0561882	0.75865	1.82104	2.32533	1.00023
TCGA-91-8497	434	1	0.415547	0	0.309928	1.29227	0.335966	0.144153	0.115215	0.817626	0.562484	0.00940317	2.36048	0.754696	0.219807	0	10.574	0.242132	0.730198	0.503949	0	0.0551474	1.23907	1.21165	0.111686	0.896104	0.849119	0.0513978	0.18708	0.382156	0.965509	0.310965	0.0719092	0.284906	0.703541	0.277785	0.239142	0.160863	0	0.568097	3.20285	0.0970042	0.17029	0	0.23043	2.18386	1.90853	0.476813	0
TCGA-55-7726	652	0	0	0.0645947	1.09436	0.0265291	0.172427	0.35512	0.141916	0.50948	0.207852	0.382218	0	0	0.631745	1.18068	0	0.119298	0.0999357	0.517282	0	4.21152	0.35678	0	0.687846	0.647041	0	0.253237	0.691306	0.0941441	16.5308	0.255354	0	0.472997	0	0.293281	30.3401	0	0	0	0.0944937	0.119485	0.0699184	0	0	0.0736978	0.357735	0.117463	3.36842
TCGA-MP-A4TI	429	1	2.01899	0.274392	1.00388	0.144892	0.669675	0.646509	0.129182	1.22232	0.420446	0.0210861	0.229145	0.0752161	1.20488	0	0.0454246	0.32578	0.121291	0.816166	0.207462	2.06108	2.0809	1.4777	0.166966	0.103938	0	0.473832	0.605966	0.714136	12.0524	0.852282	0.0537507	0.370369	0.304459	0.0296627	9.33098	0.961933	0	0.18873	0.172029	0	0.127289	0.959694	0.0430605	2.28088	0.744307	0.570254	0.511027
TCGA-50-5939	460	1	0	0.219052	0.215766	0.112456	0.555496	0	0.541421	9.69341	0.117477	0	0.256102	0.0525405	0.918154	2.22439	0.0634606	0.10114	0.931974	0.438549	0	0.403122	0.991449	1.2653	0.0583152	0.500156	0.443355	0.429385	0.195362	0.15963	6.85612	0.649463	0	0.0517425	0.193339	0.124321	3.24648	0.167984	0	0.131833	0.120167	0.0506493	0.0592764	0	0.240631	0.499844	0.12998	0.199169	0.892415
TCGA-86-A4P8	431	0	0.204751	0.413429	0.447951	1.40082	0.0183933	0.426169	0.0378465	0.195904	0.923838	0.0741313	0.0604196	0.875937	0.577628	0	0.399243	0.509035	0.426417	0.772519	0.121561	0.0362302	0.507449	1.0474	0.0366872	0.527813	0.278923	0.18009	1.4339	0.326385	1.77607	0.612885	0.85036	0.699872	14.4743	0	0.219953	0.317046	0.0990822	0.5391	0.100799	0.0955934	0	0.039232	0.0378465	1.51335	0.599666	0.250602	0.037429
TCGA-50-5936	257	1	1.03891	0.242046	0.596039	0.0248522	1.163	0.166336	0.332364	13.2749	0.194713	0.0108502	0.0353732	0.0290279	0.591812	2.08921	2.59452	0.223515	0.468093	0.193834	0	2.29083	1.41118	2.06038	0.77324	0.338726	0.489895	0.90938	0.143913	0.176386	12.1436	0.598032	0	0.314457	0	0.320533	4.08397	1.42307	2.08831	0	0.486864	0	0.0654988	0.103359	2.06066	0.103559	0.239373	0.220076	2.16941
TCGA-55-6975	118	1	0.828417	0.264114	0.65038	0	1.51579	0	0.290132	9.77386	0.0708218	0.130234	0	0	0.0922524	4.82756	0.229546	0	1.22585	0.211506	0	0.277742	0.486265	0.802938	0	1.2839	0.267279	0.798144	0.863683	0	8.14494	0.130511	0	0.452302	0	1.59888	8.31041	0.540108	2.18376	0	0.893467	0	0.0714703	0	0.362665	0	0.156718	0.600351	6.67117
TCGA-44-5643	417	0	0	0.0459491	0.0362079	0.0566142	0	0.252613	0	0.0337131	0.147854	0	0.0537209	0.0220421	0	0	0.106494	0	0.426533	2.57577	0	0.241601	3.27112	0.223506	0.489296	0.487345	0.186	0.435335	0.109279	0.100454	12.0975	0.0908225	0	0.227928	0.454221	0	0.670517	0.328878	0	0	0.0168044	0	0.64657	1.88365	0.100951	0.0524246	0.618007	0.417784	0.149757
TCGA-62-A46O	1454	1	0	0.17547	2.78269	0.234214	3.95795	3.61754	1.49386	0.257487	1.83503	0.904568	0	0	0.12258	13.2747	0.813356	0.0405089	9.2301	1.05389	0	0.0461312	2.38258	2.08046	0	4.09693	0	1.07486	0.156493	0.159838	13.9724	0.43354	0.120305	0.424842	0.123898	0.0663911	0.400088	1.83902	0.252318	0	0.946545	0	1.89932	0.124883	0.481891	0.0250248	1.52708	1.03703	0.0953151
TCGA-97-7552	1932	0	0.315499	1.3651	0.336156	10.3019	2.25926	0.0938111	0.0374896	3.62448	0.183025	0.134626	0.0398999	0.442024	0.619863	0	0.237287	0.189088	0.158398	0.109319	0	0.0358886	0.418886	3.07106	1.41731	0.0201091	0.414439	0.0668968	0.243494	0.124349	3.14165	0.202368	0	0.43531	1.85549	0.180775	0.342381	0.209371	0	2.34146	0.0124811	0.063128	0.0738805	0.019431	0.712302	0.311496	0.594011	0.248239	0.148304
TCGA-NJ-A4YP	50	0	5.94591	0.0646634	0.222927	0.00663935	0.957991	0.622122	0	3.43672	0.572201	0.0695681	0	0.201627	6.59521	3.28317	2.67887	0.0298563	1.30055	1.42404	0	1.7	5.36235	1.41541	0.103287	0.185746	0	0.850302	0.249904	0.612588	1.87509	3.9622	3.5689	0.450589	0.251121	0.868547	6.5905	0.165294	0.302195	0	0.0532093	0.104661	0.0524946	0.00920426	1.50946	0.110664	1.57315	0.646734	2.05482
TCGA-44-7667	557	0	2.33223	0.520202	2.7292	0	0	0.301042	0.300762	8.77853	0	4.71292	0.12804	0	0	4.94883	7.42423	0.0758485	1.39784	0.701616	0.144905	0.259126	0.764523	0	0.262395	0.250055	0	0.939196	0.227902	0	36.2435	0	0.713316	0.161681	0	9.24037	1.97269	0.223959	0	0	0.130169	0	0.444533	1.74593	0	0.0312375	0	1.39406	0.059489
TCGA-55-7815	773	0	10.4151	0	1.94734	0	0.271628	0.0998979	0.239532	7.13269	0.0779602	0.0130328	6.4158	0	0.203102	0	2.69528	0.402713	0.224901	0	4.35972	0.152869	0.557582	0.353548	0	0.835139	2.9422	0.189966	1.29646	0	6.28952	0	0	0.240362	0	0.660017	9.5458	0.52023	1.14968	0	0.637962	0	0.236022	0	0.39922	1.40976	2.07017	0.52869	1.89512
TCGA-55-8097	476	0	0.729959	0.305759	1.96457	0.357408	0.188351	1.13142	0	0.0949119	0.882958	0.118085	0.013749	0.394894	1.87309	0	0.354321	2.32395	0.982481	0.904083	0	0.197869	0.584591	0.60063	0.500911	0.0485055	0.190415	0.437986	0.139842	0.891264	0.519637	0.232446	0	4.30564	1.64412	1.29926	0.686434	0.0721468	0.169103	0.226481	0.0946183	0.152272	0.229126	0.0133914	0.103348	0.402518	1.02345	0.449086	0.12776
TCGA-97-A4M5	634	0	0.4596	0.221458	0.286693	8.83544	1.55389	0.304375	0.243274	7.4859	0.407202	0.0510547	0.94319	0.333881	0.486219	1.6063	2.19969	0.175288	0.636297	0.709384	0	0.266154	1.6018	0.846382	0	1.75229	0	0.692494	0.225723	1.31412	2.03865	0.750395	0.824245	0.261554	2.59127	0.119701	1.35613	0.0970451	0.0454923	4.72194	0.115701	0	0.0684885	0.0180129	0.278027	1.60624	2.52802	0.287652	2.06221
TCGA-78-7159	1221	0	7.38615	0.431719	2.01024	0.338497	0.293344	0.485479	0	4.54975	0.168386	0.0140747	0.0229427	0.0753088	0.0548348	1.83329	2.45595	0.181212	0.910803	0.377156	0.276957	0.0825449	1.24044	0.190906	0	0.543455	0	0.884722	0.280021	0.171604	6.8646	0.543029	0.861071	0.899251	0	6.65263	2.50564	1.56507	0.112872	0.377924	0.258361	0	0.339855	0.0893838	0.258681	0.223891	2.45303	1.35602	0.0852761
TCGA-64-5779	507	0	0.70412	0.118479	1.5638	0	0.442769	1.05845	0	0.554168	8.70495	0.244308	0	0.738856	0	0	4.80535	1.75052	0.824853	0.284637	2.29919	0.124592	1.76324	0.504265	2.71252	0.349057	1.19899	0.638664	0.422661	0.259017	6.10773	0.351275	3.41169	2.16891	0.125485	5.46898	3.78199	1.33258	0.25555	0	0.584951	0.0547894	0.192365	0.0337287	0	0.0337938	1.92159	0.807933	0.836646
TCGA-05-5420	457	0	0	0	0.293514	0.0254963	2.58515	0	0.272782	1.59419	0.266346	0.166971	0.25403	0.119121	0	0.504319	3.88474	0.286634	0.76836	2.78401	0.21904	0.19585	2.01924	0.905906	0.19832	0.420664	0	0.872104	0	0.0904789	4.11468	0	0	0.175967	1.88487	6.43588	5.71853	0.126952	15.4434	0	2.40659	0	0.201589	0	0.886542	1.91237	1.86638	0.169335	1.34887
TCGA-05-4384	426	0	2.02705	0.495119	0.390153	0.0610038	0.819428	0.5444	2.93703	18.3815	0.902805	0.0266337	0	0.950049	11.3449	0.100555	0.688506	0.274327	1.60862	0.792995	0.0873478	0	0.850802	0.421462	0.15817	0.087522	3.20674	1.14846	0.353258	0.252565	1.36736	0.782917	1.62941	0.315772	1.15368	0.374667	0.27094	0.354378	0	0.0595957	5.35978	0	0.0535925	0	1.0334	0.762607	1.01847	2.2959	0.215158
TCGA-44-2655	575	0	3.69734	0.225471	0.0888354	0.547891	0.882737	0.232418	2.82771	20.1823	0.161226	0.0303216	0.164754	0.694027	7.74423	0	0.152414	0.0694027	0.494176	0.872706	0.0331476	0.0987939	0.69763	0.342729	0.340136	0.68088	1.52116	0.558598	0.0893717	0.191692	1.0032	0.111416	1.0821	0.133147	2.25538	0.440765	0.394139	0.0384236	0.0270181	0.542783	4.60394	0.0173778	0.0813511	0	0.268323	0.996826	0.327038	1.5717	0.632789
TCGA-78-7156	976	1	0	0	1.07165	0.0180174	0.023421	1.56768	11.8551	15.1845	0.141164	0.0314649	0	2.31491	16.5492	0.0890964	0.559211	0.40511	0.271487	0.632367	0	0.553602	1.02308	0.426783	0.233577	1.71899	6.0378	0.788274	0.0521671	0.191815	0.565387	0.260138	0.120311	0.404139	10.2531	0.464761	0.240065	0.493421	0	0	11.2147	0	0.427369	0.0999115	0	0.0250261	2.49899	0.678092	0
TCGA-99-AA5R	658	0	0.107577	0.122185	0.722111	0	0.217438	1.28748	0.0894809	0.403414	0.786327	0.481991	7.28539	1.23087	0.455231	0.082716	0.471968	0.18805	0.504091	1.43509	0.0718518	0.256979	0.562391	0.59433	0.65055	0.239984	0.989192	1.53018	1.06549	0.771676	1.64968	0.402514	0.167543	0.808117	7.18947	0	0.705766	0.458086	2.51831	0.0980462	0.17874	0.0376688	0.17634	0.0463783	0.0894809	2.30016	1.16002	1.37016	0.663705
TCGA-69-7979	89	0	0.0475572	0.360099	0.491847	3.24379	0.205064	2.87057	0.0791146	4.07759	0.514987	0.929789	0	0	3.21995	0	1.58571	0	0.297129	1.99938	0.254111	0.252454	1.628	0.934182	0.127819	0.00707273	0	0.948997	0.285471	0.157449	5.52488	1.56589	0.131674	0.419626	0.0169509	2.03463	3.26234	0.711849	0	0.693502	0.24583	0.0444065	0.155911	0.0410055	0.237344	0	1.57643	1.85534	1.72133
TCGA-86-A456	405	0	0	0.725423	1.17899	0	0.314669	2.30564	0.846692	0.440767	0.291782	0.577205	0.0530076	3.08842	0.380075	0	0.788098	3.39128	1.89391	1.67017	1.43975	0.0476785	0.946044	0.385941	0.241399	0.240437	0.18353	0.947982	1.77917	1.85023	1.41907	4.12236	0.746041	0.48193	0.896379	0.205854	0.620262	1.29804	1.30391	0	0.630088	0	0.147227	0.0258144	0.54786	1.29321	0.825023	3.00932	0.492561
TCGA-55-8206	888	0	0.0157537	0.143143	0.234992	0.303743	0.178314	0.327896	0	0.113777	0.588547	0.00427777	0	1.93411	0.199993	0	0.912323	0.242336	0.258369	1.10809	0	0	0.834552	0.493194	0.330259	0.0421721	0.482861	0.179264	0.453909	0.608488	2.19619	0.235778	0.163568	0.946732	0.0842267	0.920713	0.282861	0.073181	0	0.201012	0.1047	0.066195	0.103293	0	0.078622	5.51189	3.28423	0.433832	0.544284
TCGA-55-7913	561	1	2.09474	0.62551	0.404884	0.0275248	2.08715	0.767601	0.0245404	0.72529	0.383383	0.00400568	0.0130591	0	0	2.94906	2.20046	0.185663	1.90092	1.03761	2.4829	0.634295	0.9597	1.6028	0.309253	1.36898	0.0904297	0.306531	0.903205	0.276753	13.5318	0.35325	1.47037	0.232182	0.0157739	3.4486	0.855733	0.890842	0	0	1.28269	0.123969	0.362713	0.0254388	0.515348	0.0509758	2.77487	2.15306	0.0728092
TCGA-93-7348	127	0	2.68419	0.270993	0.106771	2.46709	0.241127	1.0553	0	4.14227	0.435999	0	0	0.584988	0.631036	0	1.41315	0.66732	0.209629	0.578706	0	0.85493	0.18017	0.549235	3.75142	0.0665324	0	0.472178	0.161124	0.362048	1.82941	0.0892736	0.309661	0.522761	0	0.854443	5.06669	0.507995	0.064946	1.14165	0.0825891	0	0.0977759	0	0.248074	0.0515305	2.42987	1.10878	0.83415
TCGA-55-1594	1178	0	0.194626	0.78597	1.69029	0.322799	3.16456	0.360084	0.827424	11.167	0.386388	0.839714	0.0957197	0.109969	0.228777	3.05948	1.518	0.665311	0.253331	0.472061	2.77318	2.44514	0.703435	0.557538	0.313857	0.356988	0.662826	0.171184	0.272599	0.214785	14.4104	0.194192	0.0898121	0.881861	0.161866	1.38778	1.88169	0.133941	0	0.315348	0.610817	0	0.177239	0	0.21585	0.28023	1.11411	0.416866	0.177891
TCGA-97-7941	484	0	2.43661	3.30559	0.706731	7.70367	1.43644	0.211315	0.0281491	4.05632	0.32982	0.206763	0.0449384	0.35648	1.36048	0	0.475113	0.141977	0.911826	1.84686	0	0.134735	0.857073	2.46172	1.0369	0.150989	0.414911	0.234405	0.182828	0.466838	1.17946	0.861043	0	0.460017	1.48367	0.0581725	0.724493	0.890837	0	3.1769	0.121829	0.0236999	0.0554734	0.0145898	0.900772	0.570102	1.19613	0.535873	1.64248
TCGA-55-7573	487	0	0.507363	0.256114	0.645817	7.4472	0.300812	0.352008	0	0.140934	0.384589	0.192878	0.0598866	0.688015	0	0	0.237433	0.614913	0.396239	0.410199	0.0903662	0	1.13169	0.560605	0.872725	1.1771	0.414694	0.167345	0.304554	0.821207	2.16907	0.404985	0	0.677566	0.0723361	0.465137	1.16793	0.0523748	0.0736561	1.72634	0.0936654	0.142125	0.221778	0	0.168807	0.40909	2.18839	0.652027	1.05732
TCGA-44-8120	260	0	0.0155425	0.0470745	0.686251	0.00966678	0.0879616	0.42055	0	1.10956	0.176721	0	1.08697	1.01619	0.131541	1.67308	3.43671	0.499909	0.364149	1.6964	0.0830478	0.0495036	0.678913	0.801428	0.0501279	1.55332	0.0952774	1.42258	0.559779	0.514568	3.68347	0.372187	0.1291	0.478139	13.495	0.0178111	1.30948	0.553532	0	0	0.154944	0.0435383	0.331202	0.10721	0.0517119	0.402814	0.260705	4.90078	0.588128
TCGA-97-A4M2	624	0	0.0708114	0.214471	0.563344	3.14165	0.419836	2.60383	0.549731	0.399953	1.26522	0.064094	0.731344	1.78331	6.54238	0.435575	1.15983	0.396101	0.497719	1.37401	0	0.0751793	3.20281	0.738954	0.114191	0.547617	0.578778	1.05101	0.552576	0.520971	1.25041	1.0598	1.02931	0.498161	6.46129	1.27131	0.195605	0.292393	0	2.19429	0.745141	0	0.232147	0	0.078533	5.46487	4.41173	2.76255	0.0388334
TCGA-64-1678	1189	0	2.1076	0	3.44276	0	0	1.07871	2.52902	2.99441	0.168365	1.57617	0	0.627496	0.36552	0.531323	0.3638	0.144952	2.99516	0.335209	9.96921	0.385162	1.66978	0.0636276	1.22578	0.632026	1.90621	0.42735	0.0622194	0.266906	4.81667	1.55132	2.00892	0.0617966	0.110835	13.3828	2.67236	1.2305	0.0752385	0	0.995048	0	0.226542	0.029791	0	0.0298485	1.69725	1.47479	0.738969
TCGA-44-3396	411	0	5.47223	0.290138	1.25746	0.14895	0.435649	0.548309	0.05976	5.66116	0.17505	1.14778	0.985833	0.00869883	0.760068	0	0.69345	0.35165	0.0841646	1.2779	6.59013	0.915327	1.09618	0.48513	4.01644	0.26178	0.220211	1.37442	0.388139	0.581438	7.04448	0.645168	0	0.535419	0.19206	0.672383	18.7877	2.13227	0	0.152788	0.510647	0.0167714	0.215909	0.80532	0	0.217236	0.94688	2.58856	0.295504
TCGA-55-6972	1632	1	0	0.216938	1.33909	0	0.19303	1.39143	10.8033	0.252017	0.698059	0.401954	0	4.19736	14.9528	2.20293	1.08937	0.200328	1.23064	4.05362	0	1.2167	5.28107	0.439678	0.385016	1.32088	46.2493	0.307119	0	0	1.06509	0.142932	1.28904	0.17081	1.07225	0.273603	0.395711	0.369695	0	0.348161	11.5569	0	0.391362	0	0	0	2.17402	4.33942	0.0785602
TCGA-55-A4DF	440	1	0	0.418656	10.1969	0	0.833082	0.784647	1.25427	0.0558491	0.816451	17.6001	0.867691	0.07303	0.0531755	0	0.132313	0.210874	0.353297	0.304786	0.33572	0.160094	2.30071	0.833082	0.202642	0.0224259	0.770316	0.298418	0.090516	0.582439	8.54883	0.977966	1.40909	1.80701	0.725588	3.83047	1.24962	0.97289	0.54728	0	0.0695954	0.105602	0.329571	0	0	0.455944	2.52936	0.865124	0.248087
TCGA-MP-A4TD	307	1	0.523797	0.151091	2.30679	1.19453	0.685643	1.09023	1.07884	18.8387	0.32412	1.46974	0.198728	0	1.95267	0.153428	1.92597	0.279047	0.409074	0.967967	0	0.476664	3.1295	1.69954	1.76981	0.578681	0.305805	0.950209	0	0.770733	2.43405	1.26924	0.517952	0.60672	0.0800134	10.9761	3.44502	2.27872	0.217263	0.272795	1.58863	0	0.20443	0.086026	1.61826	0.474056	1.07584	0.618196	6.40166
TCGA-J2-A4AG	500	0	3.30885	0	0.869408	0.0188805	0.515401	0.631837	0	1.06247	0.591702	0	0.134367	0.441055	0.0642293	0	1.33181	0.679225	1.35134	1.98798	0.162203	0.14503	1.34011	0.223613	0.832204	0.501123	0.558267	0.225282	0.218664	0.234504	1.86205	1.36299	0.252148	0.477792	1.85022	0.104362	1.04819	0.235026	0	0.110668	0.06725	0.170072	0.547361	0.0785231	0	0.236024	0.727416	2.21532	0.799088
TCGA-44-A4SS	415	0	2.0888	3.50065	0.216028	0	2.43184	0.521714	0.509646	15.8903	0.361907	0.0075626	0.197241	0	0.648203	0	0	0.0389474	2.08807	1.01327	0.223221	0.665294	1.82482	2.41057	0.224562	0.509462	0.512185	0.564942	0.300922	0.184412	5.358	2.16751	0.289169	0.926519	0.0297806	0.670234	5.46225	0.560627	0.060648	0	0.586139	0	0.228263	0.168097	0.277989	0.0721805	0.367055	0.460178	1.14551
TCGA-55-6986	3261	0	9.29833	0.106273	1.13054	0.19641	0.0851051	0.0730321	0	17.9241	0.341965	0.00952785	0.15531	0.637252	0.0742406	0	0.369456	0.0981368	0.246627	2.80847	0	0.223515	3.35887	0.258467	0.226334	0.328753	0.215094	0.538152	0.126373	0.309778	1.76096	0	0	0.288684	1.01303	0.924823	0.339238	0.108664	0	0.0639588	0.0582991	0	0.115032	5.05244	0.0583713	0.333438	1.17712	0.724703	0.115455
TCGA-MP-A4TE	896	1	4.10474	0.478165	0.0376794	0	0.799878	0.0438132	0.385198	8.29718	0.0683836	0.00571592	0	0	0.0890765	2.2012	5.83661	0.677051	0.493185	0.714785	0.618617	0	1.06621	1.86071	0.169727	0.723158	0.258078	1.39553	0	0.0696906	3.46275	1.63823	0.305981	0.406612	0	8.00868	0.494251	0.782271	0.183355	0	1.7021	0	0.0345049	0.01815	2.31119	0.018185	0.201764	0.666635	0.484845
TCGA-97-8552	626	0	0.552328	0.440229	0.381591	36.1787	1.03412	1.51265	0.0967195	0.629847	0.849938	0.0157873	13.7937	1.7528	0.246029	0	1.27537	0.365872	0.54487	1.26915	0	0	1.01314	0.214136	0.328149	0.272367	0.356405	0.517762	0.471143	0.449131	0.891567	1.1312	0.0603655	0.603124	1.70964	0.699575	0.160602	0.405117	0.126606	8.37224	0.305899	0	0.333558	0.0250651	0.241799	3.31498	3.76157	0.920621	0.191305
TCGA-97-8171	568	0	0.0131778	0.15965	0.353825	0	0.71383	1.01485	0.131533	0.0695498	1.17728	0.533171	0.104993	1.1775	0.223058	0	0.716901	0.165856	0.246998	10.6755	0	0.10493	8.73847	4.27114	0.27626	0.658498	0	0.365104	0.0237307	1.14888	1.80036	0.197227	0.0273647	1.17376	0.056364	0	0.291214	0.204051	0	0	0.182459	0.258401	0.280814	0.0227248	0	0.170765	8.1154	1.68747	0.737136
TCGA-91-6829	1258	1	0	0.125479	0.593266	0	0.267961	0.229948	0	0.268522	0.224314	0.00749982	0.0244504	0	0.409068	0.169893	0.969388	0.463489	0.194131	0.334951	0.0737893	0.131954	0.898421	1.16985	0.445395	1.21995	0	0.0956527	0.696321	0.152401	8.85586	0.165347	0	0.592791	3.75073	0	5.76023	0.0855343	0	0	0.107077	0.193423	0.0905473	0.0952578	0.229734	0.0238604	0.529465	0.950746	1.5904
TCGA-49-4488	869	1	3.50597	0	0.719792	1.9461	0.121916	0	0.250857	4.55525	0.0612345	0.65515	0.0667462	0.0547731	8.53476	0.115946	0.264629	1.73973	0.883252	1.92018	0.302151	0.240144	0.175183	0	0	0.201836	0.92439	1.19368	0	0.12481	5.88615	0.112844	1.01769	0.161824	2.78145	0.518416	3.1241	0.875611	0	0.412304	0.104394	0.0528016	0.185386	7.67119	0	0.227974	0.0903353	2.28395	0.868315
TCGA-78-8655	2360	0	23.0168	0.103585	0.897871	0.0212712	0.331808	0.284737	0.113789	0.446504	0.222209	0	0.0908286	0.223607	2.09851	0	0.180054	0.47827	0.0801289	2.65446	0	0.163395	0.794633	0.188946	0.60667	0.869754	0	0.507616	0.492704	0.528396	3.71888	0.204744	0.142038	0.428187	0.182851	0.195962	2.36183	0.105914	0	0	0.0757655	0.0958036	0.392426	0.176932	0	0.827277	3.15517	0.565094	0.450136
TCGA-78-7146	173	1	0.15592	0.269854	1.58154	0	0.61229	0.370892	1.40808	19.8983	0.144722	0.471773	0.492963	0	3.39327	2.87728	0.0390891	0.996772	1.30468	2.26907	5.17727	0.248306	1.15928	0.902428	0.0718394	1.33168	0.136544	1.38854	0.160446	0.196651	26.6427	1.40015	0	0.613521	0	0	0.707585	0.620827	0	0.0406017	0.148035	0.0623958	0.0730236	0.0384113	0	0.50031	0.507059	3.31235	0.109938
TCGA-MP-A4T8	161	1	13.1143	0.364709	0.535592	0	0.0531025	0.72911	0.0364216	6.22145	0.568997	0.154571	0	0	4.12279	0	4.22634	0.0612339	2.46218	1.38067	4.79635	2.23144	4.63927	0.403186	0.035306	0.752145	0	0.34662	0.197131	1.03894	4.21197	0.983019	1.31845	0.509058	0.257519	2.33332	3.05413	0.91533	0.619788	0	0.618401	0	0.107664	0	1.23833	0.113484	1.49519	0.934523	2.19721
TCGA-44-5644	498	0	1.75643	0.372388	4.67411	0	3.46495	4.16765	0.233756	1.75643	2.45359	1.84101	0	0	0.148653	4.53776	8.13746	1.52288	8.39502	0.766834	0.656959	0.279717	0.750908	0.582226	0.056649	1.97481	0.430688	1.32087	0.18978	0.465206	7.54173	0.841209	0.145894	0.376981	0	8.49408	1.11593	0.435158	0.0764968	0.192099	0.0389111	0	1.09407	0.0908676	4.44137	0.0303477	4.37721	0.628804	1.27148
TCGA-S2-AA1A	513	0	0.0664999	3.52472	0.0793565	1.32353	1.12906	0.138412	0	1.38541	0.37806	0.00902873	0	0.0241548	0	0	0.875255	0.0929959	1.24644	1.04841	0	0.105903	1.20518	1.59203	2.84182	0.91976	0.407653	0.493511	0.17963	0.293551	1.01977	0.298582	1.58805	1.53432	0.248878	0.0381033	1.51549	0.978227	0	0.242433	0.14732	0.0931414	0.0545031	0.573385	0.331881	0.114898	5.97564	0.412043	1.47699
TCGA-91-6835	79	0	0	0.0379911	0.583771	5.25821	0.89243	0.417725	0.0417337	0.139371	0.611235	0.565405	0.0222084	0.0546738	0.0530797	0.0771571	0.792449	0.877059	0.17633	1.82542	0	0.0799029	0.664488	1.47837	0.849562	0.906615	1.23029	0.347527	0.271059	0.304537	8.11375	0.150185	0.885606	1.57941	1.52904	1.03495	1.80176	0.0776911	0.109259	1.14321	0.263986	0.175686	0.452344	0.0216307	0	0.325088	0.300572	1.58896	0.12382
TCGA-78-7149	1093	0	0	0.108438	0.868733	1.52906	0.115785	0.298079	2.38241	17.5897	0	0.0648128	0	0.918995	5.15119	0.07341	0.502642	0.0333786	0.559222	0.926278	0	0.0380112	1.20898	0.307687	0.346416	0.149089	1.02422	0.472356	0.085965	0.421451	1.73028	0.142892	0.247823	0.162224	0.638061	0.21882	0.560431	0.147836	0	0.348062	6.62284	0	0.0391251	0	0.158828	0	1.37268	1.51179	0.74611
TCGA-53-7813	424	0	5.17436	0.0718895	1.07633	0	0.652461	1.97613	0	0.474712	1.77349	0.257808	0.0840489	0	0.301324	0.292005	1.99937	0.730241	2.89177	0.690841	0.126826	0.151198	5.20606	0.174843	0	0.783654	0	1.00991	0	0.628657	3.04422	0.284192	3.35162	0.526414	0.101521	3.20962	0.393396	1.47013	0.310122	0.173062	0.630991	0.0664894	1.01159	0	0.394858	0.123031	7.79208	2.87602	0.390503
TCGA-73-4676	164	0	1.00555	0.520953	0.299989	0.082291	0.320912	0.330465	0.748358	4.22654	0.17193	0.919741	0.960452	0.0961174	6.77467	0	1.11451	4.77367	1.23997	2.82403	4.80736	0.126423	0.971435	0.487311	0.128018	0.0236125	0.162215	0.994988	1.14366	0.584053	14.5346	0.237625	0	0.340767	1.38648	0.0606487	1.82742	1.63899	0	0.0482349	0.630188	0	0.303633	0.136898	0.0440211	1.46306	0.190228	2.58695	0.0435355
TCGA-05-4422	365	0	0.0139883	0.508406	0.225351	0.00870014	1.37975	1.39753	12.7988	17.6719	0.47715	0.00379839	0	0.121943	1.53904	2.66739	1.54653	0.0782469	1.83532	1.42498	0	0.13366	4.38768	1.4941	0.451153	2.08451	0.25725	0.726671	0	0.802731	3.47114	1.00491	2.58523	0.555422	0.074788	0.192361	0.0772809	0.844742	0	0	1.8206	0.0195924	0.160506	0	0.0465409	0.0725068	2.76535	1.09787	0.161097
TCGA-49-AAR3	1893	0	0.269213	0.271795	0.240946	0	0.471589	0.560339	1.49285	2.24344	0.0728814	0.121838	0.0794414	0	0.284806	0.413996	0.393702	0.376478	0.420499	3.04719	1.31861	1.07182	1.89738	1.32206	0.0723561	0.260244	0	0.910151	0.1616	0.643711	14.8871	1.20876	0.186346	0.385205	0	1.07978	5.94928	0.416861	0.68395	0.163575	0.12425	0.0628445	0.147098	0.9285	0.0746425	0.620195	1.50524	1.48274	0.221458
TCGA-50-5946	686	0	0.705717	0.534363	5.17324	0.250816	0.475472	2.58802	0	0.233372	2.70202	9.43099	0	0	0.035552	9.14712	0.176923	2.46725	0.236207	1.7117	0	0.0802766	2.77189	1.20679	0.433542	2.45894	0	1.03083	0.0605171	0.927157	20.0982	1.2574	0.418705	1.67695	0.161704	0.442875	0.765849	0.234163	0.07318	0.490053	0.297792	0.376551	0.523317	0.260783	0.11181	0	0.120791	1.75835	0.138221
TCGA-49-6767	677	0	2.06749	1.78225	1.17667	0.0791321	0.66862	0.463429	0.158742	0.273899	1.29164	0.932804	1.35159	0	1.0768	0	0	1.11202	0.521661	1.85156	0.509871	0.405235	0.502547	1.99157	0.0512933	0.823096	0.38997	0.487839	0.114558	0.456327	18.6238	0.47605	0	0.603035	0	0	1.44975	0.541774	0	0	1.32122	0.089101	0.990637	0	0	2.19828	0.152438	0.656949	2.56419
TCGA-49-AAQV	677	1	1.37388	0.282549	1.05252	0.548568	0.411398	1.69457	0.0564334	8.4525	0.137755	0.30398	0.0450462	0.209472	1.72262	0.0521669	1.25016	1.11482	0.437137	2.71522	5.89097	0.48621	1.47392	0.624715	2.92671	0.143784	0.31193	1.94687	0.427622	0.486677	4.11436	0.660025	0.704435	0.376177	0	3.05166	1.21819	0.709127	0.590971	0.432847	0.497878	0.0712703	0.305836	1.8866	0.451467	0.835225	3.43443	4.1805	0.502298
TCGA-J2-8194	724	0	3.00205	0.101028	0.895612	0.383804	0.0674203	0.38185	0.11098	10.3728	0.243814	0.00452878	0.0295289	0.133275	5.25792	1.23108	0.760977	0.139939	1.7584	0.970853	0.133673	0.239042	1.68179	0.368564	0.0537905	1.24266	1.22687	0.940664	0.15017	0.147244	1.86004	0.748839	2.77065	0.304264	2.24705	0.516037	3.75475	0.077475	0.363184	0.273608	0.0554215	0.0700791	0.136693	0	0.11098	0	0.0399648	0.528181	0.521343
TCGA-05-4249	1523	0	1.70296	0	0.914489	2.54201	0.0688414	0.0708906	0	0.21287	0.276615	0.217339	0	0.408254	2.12588	0.104752	0.149426	0.381037	0.438891	0.784791	0.0454969	0.867842	0.419418	1.19172	2.30682	0.00759795	0	0.404417	0.030667	1.4283	1.89925	0.254874	0.0707261	2.71081	1.01974	0.195153	1.57589	0.079108	0.927097	0.341459	0.0188632	0.0477042	0.139574	0	0.141649	0.132407	0.693722	1.07863	0.532331
TCGA-55-8614	536	0	0.0951438	0.096056	0.0378461	2.72208	0.0512819	0.198032	0.105519	0.22905	0.463632	0.266966	0.0561514	0.115197	0.268412	1.1705	0.389592	0	0.743051	2.53846	0.33892	0.55557	1.01689	0.175213	0.15343	0.80654	0	0.360887	0.114224	0.62999	3.80229	0.284795	0.0658574	0.657995	0.237386	1.01763	2.49679	0.441974	0	0.809336	0.0878235	0	0.0519864	0.0273454	0	0	0.683965	1.09171	2.03492
TCGA-78-7162	3169	1	0	0.0270938	1.05682	1.76927	0.0723235	0.148953	0.595258	5.06414	0	0.315779	0	1.65063	3.33119	1.48569	0.0627939	0.0250194	0.461091	0.52073	0	0.0284919	0.324239	0.263579	0.115405	0.263415	3.94827	0.548795	0.998763	0.157952	1.04754	0	0	0.179196	5.1653	0.041005	0.321237	0.664876	0.0389597	0.358731	1.10977	0	0.0879804	0	0.148814	0.0927361	0.321535	0.295614	0.38265
TCGA-49-AARO	3759	0	0.703752	0.843719	1.94206	12.2375	0.568978	0.976525	0	1.2055	0.33341	0.796241	4.59466	0.021302	2.1715	0.180372	0.205836	1.80428	0.549615	1.63581	17.3916	3.26884	1.03559	0.972004	0.0945733	0.248573	1.43803	0.855944	0.844881	3.07422	4.16962	0.526638	0.0608912	0.944032	0.282195	0.772874	8.54553	2.08863	20.3057	3.84842	0.324803	0.0410706	0.0961322	0.4551	0.0487809	2.35589	0.913449	14.3333	1.78498
TCGA-44-3919	190	0	3.96666	0.147714	0.688692	0.141555	0.82804	0.879758	0.0270443	0.641241	0.184844	0.00441439	0.0143915	0.307058	1.68544	0	0.31382	0.682024	0.342797	0.670318	0.173729	0.41423	0.566583	0.449069	6.81614	0.00725316	0.398626	0.892776	0.117101	0.5741	6.52703	0.145985	0.0337583	0.314025	0.4172	0.372595	1.21249	0.327246	0.247808	0.177798	0.22509	0.0683091	0.106592	0.0420516	0.297487	0.0983097	1.01284	1.92506	0.508175
TCGA-86-A4JF	536	0	4.03936	0.0668539	0.882404	0.0960995	0.678141	0.18377	0	1.43474	0.286829	0.521454	0.0195404	0.128281	0.560435	0	0.813454	1.57425	0.362008	0.963674	0	0.316366	0.851345	0.447137	5.8732	0.374228	0.13531	0.251173	0.278244	0.243592	6.03122	0.594642	0.320852	1.94237	0.259628	0.177064	1.06703	0.102536	0.144199	0	0.073349	0.061832	0.868366	0.837412	0	0.0762754	1.32231	8.05409	0.0726298
TCGA-86-8278	476	0	8.74175	0.256099	0.861557	0.129453	0.347071	1.08304	0.0865625	4.9288	0.274691	0.148359	0.103644	0.207905	3.41298	0	0.388089	0.509366	0.121913	0.694142	0	0.35218	0.912794	0.910332	0.5664	0.464314	0.239233	0.296054	0.117129	0.129203	2.13993	0.194693	0.135066	0.809682	0.04173	3.8461	3.44968	0.261859	0.339932	0.260834	0.0504323	0.0728805	0.0213236	6.92054	0.129844	0.0561905	5.8603	1.23591	2.54683
TCGA-MP-A5C7	1862	0	0.0187094	0.566664	1.13865	0.0116365	0.347907	2.41438	5.78913	7.48376	0.972481	0.934789	0	4.56679	4.94826	0.517884	7.1248	0.104656	1.40271	0.998342	0	0.208566	2.78213	1.30927	0.271539	0.0667793	1.72037	0.592413	0	0.433592	1.25196	0.504027	1.20439	0.535409	0.0200059	1.35074	0.516818	0.434557	0	0	2.27963	0.0524097	0.398688	0.0161319	0.0311244	0.0484891	1.43464	1.49416	0.584841
TCGA-99-8032	44	0	2.14543	0.140043	1.23597	0.0920257	0.343922	0.692921	0.0615358	2.51225	0.30042	0	0	0.13436	0.234796	0.227534	7.62742	0.620742	0.866656	1.07663	4.24946	0.589079	2.59556	0.544959	0.178953	0.288813	0.340133	0.484973	0.366367	0.224518	4.84733	1.77157	0.192032	0.52266	0.138437	4.62046	2.91212	0.715966	2.81927	0.0674262	2.01792	0.0259047	0.454756	0	4.09213	0.0639117	2.92505	1.22238	4.01657
TCGA-78-7540	881	0	2.36501	3.46673	0.0723652	2.85702	6.64328	0.0631092	0	6.89794	0.295502	0.119383	0	0.330401	0.833996	0	0.106419	0	0.674872	0.330938	0.0405029	0.120716	0.162033	1.03299	0.342268	0.250266	0	0.307522	0	0.234228	1.31035	0.136139	0	0.325383	1.28066	0.469077	0.041878	0.399073	0	0.359247	0.100756	0.127404	0.198806	0.0261435	11.7022	1.20492	0.799214	0.187871	0.0249421
TCGA-50-6591	119	1	1.25262	0.142271	2.1114	0	0.126592	0.06518	0.0520955	0.0260963	0.101733	1.92178	0	0.090998	0.0662586	0	0	0.175171	0.0733701	0.15191	0.0836639	0.0498708	0.48022	0.173009	0.151499	0.502984	0.383937	0.0464799	0.620325	0.241913	18.9469	0	0.130057	0.89616	0	0.0358866	0.648782	0.193961	0	0	0.815153	0.0877227	0	0.081004	0.0520955	0.0270535	0.450239	0.47431	0.051521
TCGA-35-4123	182	0	4.63223	0.25509	0.565343	0	2.74074	0.43825	0	0.0994292	0.068402	0.903359	1.19294	0	0.0445502	0	0.0369505	1.11891	0.197327	1.73637	4.44399	1.2742	2.64179	0.426527	0.067909	0.526075	0.387221	1.13548	0.151668	0.0697093	13.2676	0.31513	0.13117	0.271147	1.30585	0	5.23465	0.717274	0	0.0383804	0.373163	0	0.276114	1.97888	0	2.12822	0.201818	5.42149	0.519616
TCGA-55-6543	435	0	0.907679	0.171822	0.0676977	0.546898	0.710918	0	0	1.14248	0.0460738	0.0154045	0.225994	0.123636	1.02027	0.0872393	0.199111	0.0396666	0.132914	3.71512	0	0.587236	1.15993	0.208944	0.594642	0.0126554	0	0.210503	0.664037	0.375635	0.869948	0.0849052	0.412312	0.29425	0.394297	0.617601	1.48872	0.307451	0.432376	0.620448	0.282772	0.0397287	0.139487	0.220115	0	0.71063	1.90315	1.2498	0.0466666
TCGA-44-A4SU	409	1	3.27601	0.941529	0.741925	0.669267	0.483326	2.38902	0.0397801	2.31818	0.194208	0.0454526	0.105844	0.799089	0.91071	0.514817	1.72053	1.03664	0.560253	1.68197	0.191657	0.342732	1.27788	0.616509	0.154246	0.928189	0.439761	0.899131	0.215309	0.844456	2.00016	3.43572	1.6883	1.0008	0.0255695	0.383641	1.61834	1.03676	0.104144	0.348704	0.14568	0.13397	0.156789	0.123709	0.11934	0.165264	5.35758	4.90592	3.46204
TCGA-93-A4JP	578	0	0.0208561	0.284257	1.18219	0.492923	0.16862	0.737967	0.277565	0.220148	0.643663	1.14965	0.258484	1.303	0.48541	0.12829	0.109801	0.116664	0.0977289	0.303516	0	0	0.474894	0.499302	0.639024	0.344292	0.255702	0.392104	2.4037	0.276196	3.95422	0.749146	0.303164	0.693828	1.6057	5.521	0.288059	0.742774	0.408749	0.684302	0.0924071	0.0876349	0.102562	0.0179829	0.0693912	3.45938	0.924565	0.861518	0.0343129
TCGA-73-4666	800	0	0.0135976	0.72072	0.803212	0.0422859	3.18813	0.42453	4.45625	17.7676	0.265043	0.690463	0.650023	0.069147	1.03573	0	0.167038	1.80647	0.19115	6.00249	0.18164	0.216546	4.42311	1.42733	0.175422	0.370071	0.583487	0.551647	0.07346	0.0750301	20.359	0.162808	0	0.49127	0.0872393	0.0311649	2.68564	0.77904	0	0.0247859	0.850988	0.0380904	0.423494	0.0234487	0	0.422891	0.211792	5.44836	0.20134
TCGA-05-4405	610	0	0.109622	0.221346	0.261631	0.727258	0.265885	1.14083	0	0.629311	0.296769	0.0099223	0.129392	0.424726	6.49439	0	3.39864	1.99289	0.513674	1.41806	0.0976236	1.04746	0.78109	1.48042	4.12482	0.0489091	0	0.650824	0.394816	0.403254	2.44515	0.328133	0.0758791	0.980333	0.820528	0.125623	2.9272	0.0565811	0	0.266427	0.141663	0.255899	0.239589	0.0315066	0.182364	0.12627	2.97706	2.36474	6.85339
TCGA-86-8668	423	0	0.0381521	0.115554	0.273169	0.616956	0.339302	0.317639	0.0634687	1.38831	0.433799	0.103599	0	0.776049	0	0	0.535626	2.50761	0.357551	0.647759	0	0.0607583	0.780078	0.491817	0.922869	0.987277	0.233878	0.169881	0.343523	0.210519	2.76573	1.14201	0.0792254	0.313893	2.24377	0	1.42276	0.472611	0	0.0695441	0.0633901	0.106874	0.125077	0	0	0.0329596	4.38826	0.840521	2.38521
TCGA-49-4507	268	1	0.491255	0.348725	1.19078	0	3.28911	0.0958589	1.94094	7.99568	0	0.429368	0	0	0.0324817	3.44675	0.0269407	0	0.71936	0.558528	0.0410143	0.268928	0.61351	0.226169	0.0495127	0.636989	0.188216	0.387357	0	0.152476	5.30758	1.88405	0.796971	0.0658982	0	0.0703702	0.614898	1.04594	0	0.0559665	0.229563	0	0.201316	0.0132368	0.459695	0.0265247	1.19556	1.18373	0.656681
TCGA-MN-A4N1	827	0	0.684194	0.0971373	1.735	0.0132982	0.985325	1.95811	0	9.46706	0.659864	0.406409	0.0378557	0	0.769061	0.0657597	0.637869	1.2857	0.701322	1.45206	1.08533	0.783148	1.01344	0.196873	0.586149	0.0763153	0.524276	1.20592	0.308025	1.17978	6.4383	1.088	0	0.54303	0.274352	0.24502	1.59467	1.12565	0.931195	0.389736	0.390773	0.0898406	0.45562	0.073742	0.0355689	0.775786	3.68888	2.50241	0.492472
TCGA-05-5715	62	0	2.34149	1.02946	0.202803	0	0.79387	0.235818	0	0.996602	0.122688	0.02051	0.167164	0.438968	3.5958	0	2.9824	0.845014	0.265449	0.641203	0.201794	0.90215	0.122847	3.54697	14.3119	0	0	0.336324	0.0680092	0.0833553	2.52714	0	0	0.0945659	0.282681	1.25508	4.5902	0	0.822398	0.0688402	0.250994	0	0.123812	0	0.816742	0.81565	0.180994	1.35202	1.05627
TCGA-55-8507	418	0	0.998606	0.561701	0.74905	0.283928	0.369081	0.356313	0	0.110956	0.787855	0.914206	0.101032	0.227998	1.3281	2.1938	1.75246	1.27679	0.935866	0.968837	0	0.136312	1.24629	0.525428	0	0.0636485	0	0.409363	0.205519	0.220407	7.00046	0.0854039	1.00721	0.44907	1.18984	4.47939	1.57628	0.176718	0.621308	0.104015	0.410848	0.0399621	0.233844	0	0.0949285	1.05988	0.376029	1.96429	0.0938815
TCGA-55-8094	541	0	3.79028	1.97929	2.18355	0	0.105669	1.03374	0.260913	7.13037	0.169838	1.76741	0.0462813	0.170906	1.27208	5.30612	9.22045	0.21933	5.45071	0.634016	0.698363	2.12305	1.16612	0.914626	0.168614	1.64443	0	2.66413	0	0.721183	7.28822	1.01718	1.84556	0.31792	0.251561	2.7559	0.252726	0.809522	0.0569226	0.047648	2.59142	0	0.471331	0.360619	29.0483	0.112911	0.125275	1.72764	0.0860117
TCGA-73-4658	1600	1	2.42801	0.129774	0.443136	0.266493	0.646645	0.0594548	0	0.634775	0	0.00775654	0.379311	0.0207513	0.120877	0	4.81234	0.918762	0.267702	1.10853	21.3682	0.409413	0.716791	0.26302	0.783089	0	0.175107	0.240251	0.308639	0.189141	3.82289	0	0	0.255451	0.580341	0.360078	6.5492	0.973084	0.74644	0.156205	0.205664	0	0.56188	0.0246296	0	0.567575	0.0684486	4.64113	2.63175
TCGA-62-A46Y	414	1	3.79916	0.323628	1.06258	6.36513	0.537528	1.08729	0.237006	4.21469	0.308552	0.303041	0.399386	0.983229	0.30144	0	1.33343	3.0217	0.445059	2.9948	0.126875	0	2.03026	0.262365	0.0765822	0.0635639	0	0.317187	0.171039	0.786124	3.70743	0.497528	0.0493075	0.857876	1.01561	0.244896	0.29516	0.551511	0.258535	2.85662	0.512878	0.166288	0.467067	0.0204736	0	2.17439	8.13647	1.79821	0.195327
TCGA-55-8299	469	1	2.60913	0.0323871	0.446618	0.0266029	0.103744	0.13354	0.320199	1.9723	0.347383	0.19164	0.037865	0.139827	0.678751	1.05241	0.0375309	0.568242	0.601281	0.51872	0	1.43045	1.1727	0.827071	0.0689758	0.0858759	0.262202	0.222198	0.808765	0.448428	8.22875	0	0.666152	0.39016	0.937601	0.441145	3.6332	0.728542	0.325999	0	0.165824	0	0.455733	0.0922003	0.320199	0	1.84489	0.5595	0.457408
TCGA-55-6978	176	1	1.55647	0.189651	0.0960718	0.734391	0.593036	0.26066	0.029762	0.551622	0.348718	0.306054	0.110864	0.0129967	0.378533	0	0.031396	0.775579	0.167664	1.38857	1.91188	1.13964	1.19716	1.28491	0.0865511	0.0239461	0.219342	0.238984	1.51421	0.197435	28.3327	0.0535517	0	0.915152	0	0	19.7184	1.35742	0	0.228276	0.128809	0.125289	0.498541	0.740437	0.029762	2.19469	0.34296	1.13315	1.88376
TCGA-NJ-A4YG	1904	0	13.9185	0.0820153	0.177727	0	1.46683	1.40904	0.405427	2.06852	0.263908	0.00735301	2.42116	1.02293	4.23979	0	1.52066	2.46142	0.444107	1.37926	0.0723449	0.948722	5.70026	0.548541	0.131003	0.0120815	0	1.01819	0.0975273	2.1815	0.830501	4.45804	0	0.445577	0.637015	0.899911	2.91724	0.37737	0.176902	0.0493595	0.0749862	0.0758546	0.221937	0.0233483	0.315332	4.37456	3.08216	0.521996	0.75736
TCGA-55-7914	187	1	4.90853	0.36359	0.302426	0.0995513	0.10784	1.27707	0	0.452023	0.736637	0.840286	0.0236159	0.0775185	3.04796	0	0.18726	0.522281	0.375011	1.6823	0	1.0196	3.89251	0.736905	0.860386	0.0238043	0	0.184776	0	0.824316	5.80157	0.399259	0.0553961	0.515303	0.713134	0.0305707	2.76339	0.495689	0	0	0.147746	0	0.131185	0.0230016	0.0887573	0	0.862977	1.06522	0.0877783
TCGA-91-6848	224	0	0	0	0.0735379	0	0.0332149	0.256527	0	2.49919	0.266925	0	0.0363689	0.0596898	0.0869242	6.69675	0	0.0574514	0	0.19929	0	0.981377	3.83726	0.832218	0.132501	0.146636	0.503684	0.0203256	0.0739817	0.0453378	35.2798	0.122973	0	0.514353	0.0439294	0	6.41187	0.0636141	0	0.0748858	0.0910122	0	0.336712	0	0	0.141965	0.639888	0	2.29806
TCGA-05-4402	244	1	3.68525	0.67755	0.857065	0.834814	1.23749	0.294075	0.0391736	0.987704	0.0956233	0.473173	0.0625382	0.10264	1.14594	0.832876	0.0826486	0.345768	0.993081	0.428361	0.660572	0.731263	0.421289	0.303555	0.911368	0.283667	0.144352	0.990275	0.445255	0.33783	4.46457	0.176216	0.41564	0.210585	0.239207	0.188896	3.30116	0.309932	0.205113	1.20185	0.104334	0.0494727	0.385996	0.101519	0.0391736	1.27144	0.578374	2.31829	1.27847
TCGA-64-5815	224	0	5.41229	0.221521	0.938252	0	3.22271	0.152231	0	3.95154	0.0594006	0.0496507	3.72296	0.106265	0.541626	0	0.128352	0.306841	0	0	12.8965	4.30961	0.135949	0.673451	0.412807	0.0163159	11.2088	0.289483	0.197564	0.0807145	7.13732	0	0	0.196221	0.0391036	0.209537	10.7584	0	0.0796343	0.0666593	0.0405071	0	0	0.472973	0	1.51643	0.0876298	0.654594	4.03105
TCGA-MP-A4TC	74	1	0.209076	0.0703604	0.956408	0.0144486	0.225382	1.16045	0.0386459	1.16799	0.113202	0.334329	0	0.0168762	2.40847	0.0714484	0.448444	0.552274	0.598708	2.31016	0.372385	2.07175	1.19826	0.812836	0.337159	0.497503	0	0.586161	1.33869	1.05111	6.99527	0.20861	0.0482401	0.282538	7.79991	0.0266216	4.65242	0.611514	0.101175	0.0423452	0.167258	0.0325375	0.228478	0.420637	0.193229	0.040138	0.334	2.23908	7.14707
TCGA-69-8255	129	0	0	0.534955	0.189695	0.00732356	7.46366	0.14705	0.666009	0.255124	0.554663	0.7354	0.0208479	0.0256622	0	3.76637	6.79843	0.0493997	1.07593	9.56757	0.0314585	0	6.88347	0.412003	0.0189885	0.551622	0	0.116513	0.0848177	0.155935	10.1775	0.105738	0	0.939292	0.277	0.566737	0.178896	0.109397	0.0512828	0	0.802134	0	0.482537	0.0101528	0.0587655	0.345862	1.70706	1.99423	0.0193724
TCGA-55-7574	995	1	1.26758	0.185768	1.07349	0.305181	0.595062	0.170215	0	0.601988	1.06269	0.710608	0	0.504981	2.76851	0.12576	0.645817	0.628999	1.43703	0.297531	0	0.455826	1.21608	0.451806	0	0.857441	0.501319	0.343912	0.294538	0.676874	3.53422	1.34635	1.18874	1.98925	2.66711	0.140575	9.60088	1.96278	0	0.298137	0.0679387	0	0.0670262	0.0352566	0.272091	0.105974	1.81267	0.731926	4.64181
TCGA-62-8399	2696	0	0	0.54735	1.37005	0.185128	0.189081	0.354018	0	0.265761	0.966964	6.42557	0.0376428	0.123561	0.854706	1.63475	0.373107	0.416248	0.498127	0.567244	0	0.0338585	1.19545	0.587298	0.068571	0.256116	0	0.157782	0.382866	0.0469259	5.63148	0.700044	0.0882991	0.867004	2.13701	0.0243642	0.587298	0.592582	0	0.155018	0.176626	0.0893355	0.174253	0.0366637	0.0353689	0.220407	0.229259	3.51295	0.384767
TCGA-86-7711	630	0	0	0.0448128	0.158906	0.00920236	0.131585	0.307958	0.910708	0.0534291	0.0720991	0	0	0	0	4.55058	0.0778953	0.0413819	0.242658	1.18426	0.0395289	0.377002	1.05883	0.163484	0.143159	0.745946	0	0.995544	0.18651	0.130626	14.356	0.132865	0.430141	0.291095	0.015821	0.474752	2.37052	0.343656	0.0966583	0.0269698	0.0163889	0	0.242531	0	0	9.10081	0.177272	2.48546	0.194738
TCGA-55-6968	1293	1	0.0338651	0.307708	2.82886	0.0210627	0.273796	0.986813	0.563369	21.2033	0.385054	0.0275873	0.059959	0	0.143306	0.416622	0	0.0473582	0.793436	0.821389	0	0	0.944214	0.374188	0.0546113	0.362623	0.207598	0.753962	0.365906	0.112118	15.2963	0.101369	0	0.266508	0	0.155233	3.46124	0.314629	0	0.0617296	0.0187557	0	0.222046	0	0	0.702145	1.21724	1.7253	0.780018
TCGA-86-8054	745	0	1.5878	0.105694	0.499721	0.0325565	0.0423205	0.581071	0	0.431362	0.3401	0.00947589	0	0.164782	0.110754	2.25389	3.61318	0.829615	0.654085	0.253923	0.65262	0.6391	0.527029	0	0.253237	1.16772	0.106961	0.120856	0.0628421	0.192556	17.3676	0.208913	0.144931	0.917503	0.559723	7.01832	1.25316	0.162107	0.0379958	0	0.840728	0.0244386	0.0572025	2.70802	0.0290265	0.0150736	0.878023	0.360376	0.0287064
TCGA-44-2666	97	1	11.5375	7.0721	2.39303	2.83618	0.488609	3.88801	0	1.03777	11.6906	0.790689	0.389095	0.119737	22.9004	0.337951	1.44623	1.53662	3.08933	1.19931	0	7.61202	6.5103	8.19531	3.80971	41.524	0	1.11445	2.77025	4.30481	2.29775	0.328909	0.798615	5.67973	8.92966	0.251841	0.227648	0.510435	0	0.901318	19.474	7.46428	19.8129	89.0115	11.0591	0.0474632	10.3346	0.907789	0.0903895
TCGA-05-4425	669	0	0.298586	0.316522	0.997676	0.0928543	1.40015	0.0621476	0	0.713289	0.0484999	0.843216	0.0792981	0.845954	1.01082	0	0	0.167022	0.139913	1.44843	0	4.70751	0.374628	1.53962	2.07047	0.0133218	0.183037	0.842033	0.107539	0.296561	5.24479	0	0.124007	0.309744	1.53253	0.034217	5.73235	1.6182	0	0	0.0992208	0.0418208	0.293664	0.0257452	0.0993437	0.283743	0.465067	2.13788	1.4246
TCGA-50-6590	1288	1	0	0.0900723	0.993678	0	0.312568	0.0618985	0	1.70173	0.241528	4.21533	0.0789803	0	0.251691	0.914652	0.052189	0.457469	0	2.45246	0	0.2368	1.83799	0.492896	0.143872	0.278636	0	0.26484	0.214216	0.0984576	16.3347	0.356072	0	0.244675	0	0	4.27176	0.184196	0	0	0.0823526	0	0.487479	0	0	0.128457	0.534465	0.286638	1.12532
TCGA-50-5044	624	1	0.198143	0	1.11132	0.788716	2.30683	0.0824827	0	0.737531	0	0.204455	0	0.316675	0.335391	0	0.139088	0.110836	0	0.384472	0	0.883533	0.202567	0.291914	0.0639055	0.123765	0	0.0980308	0.0713633	0.306132	11.0491	0	0	0.0283514	0.55087	0.272478	1.86095	0.613626	0	0.505647	0.241425	0	0	4.71534	0	0.239646	0.52228	0.436524	0.391186
TCGA-05-4390	1126	0	4.49477	0.203188	1.10077	0	3.17295	0.139633	0	0.14908	0.108969	0.391658	0.445416	0.0487354	0.0709717	0.20633	2.47232	0.375263	0	0.244073	1.61307	0.534182	0.872885	0.988346	0	0.419037	0	0.796578	0.302022	0.259121	10.1941	0.903643	0.139309	0.239976	0	4.84334	6.71767	1.66206	0	0.0611426	0.0557321	0.0469813	0.109967	0	1.72984	0.231823	1.0851	1.20084	1.21409
TCGA-78-8648	1209	1	0	0.27164	0.214052	0	0.087013	0.149339	0	0.418537	0.349631	0.321468	0.158792	0.495169	0.075905	0.110336	0.440695	0.100337	0.168104	0.696104	0.191688	0.571313	0.216719	0.264262	0.173556	0.0160059	0.439833	0.0887446	0.452223	0.197952	4.80117	0.107384	0	0.384986	0.65213	0.205556	2.13061	0.333299	0	0.130785	0.139081	0	0	0.0309324	0	0.309921	1.11754	0.493966	3.65935
TCGA-73-4675	40	0	4.14802	0.0628169	0.214499	4.11924	0.55894	1.32383	1.2651	19.1424	0.0449181	0.00375453	1.38315	0.381694	0.702124	0	2.86322	0	1.3282	1.07316	0	0.858759	1.41997	1.50231	0.557429	1.61627	0	1.97698	0.0746978	0.198365	1.61915	1.82106	0	0.0395681	2.46907	0.25352	1.54687	2.09817	0.0602187	0.907327	5.37574	0	0.339971	0	1.67913	2.17397	1.55722	0.323652	1.25114
TCGA-05-4432	761	0	0	0.271635	0.561877	0.0185935	0.459228	0.37334	0.0745986	1.59025	0.291354	0.381533	0.595461	0.0651527	0.0948796	0	3.54124	0.167225	1.64599	0.652586	0.0798688	0.0952172	0.902982	0.385375	0.144627	0.233415	0.274891	0.266229	0.0807526	0.0164957	6.91823	0.0894851	0.155197	0.299428	0.351633	2.50088	1.17677	0.740652	0.2604	0	2.35937	0	0.122509	0	0.0745986	0.193697	0.501452	0.905589	0.418063
TCGA-86-7713	422	0	4.4456	0.633135	1.96238	0.026003	0.135206	0.319071	0	0.092907	0.814917	0.132447	0.0493482	0.05062	0.91408	3.08604	5.5516	0.0194887	1.4693	1.31826	0	0	1.66433	0.205313	0.112367	3.48814	0	1.52376	0.250961	0.0153795	9.98598	0.292005	3.21224	0.603199	0.402347	14.0219	0.442706	0.0215792	0	0	0.733238	0	0.456878	0.192258	0.255019	0.0240787	0.651188	2.28348	0.137567
TCGA-44-A47G	351	0	1.45311	0.84637	0.867022	1.25138	0.858527	1.39592	0.139462	4.30033	0.680859	0.136585	0.247381	0.263907	3.54755	0	0.539436	4.49403	0.654718	0.948898	0.223972	0.445022	1.81798	0.514614	0.405571	1.2343	0.513909	0.400938	0.251612	1.14103	4.36316	1.67293	0.232114	0.949629	0.268927	0.160117	3.51224	2.63949	0.121704	0.407499	0.247626	0.273978	0.229031	0.433704	0.139462	1.11049	1.50664	1.53909	0.689621
TCGA-MP-A4SY	1501	1	5.43774	0.496073	1.23787	1.37184	0.317809	0.54545	0.072659	5.52024	0.673975	0.00593	5.89645	0.126917	2.26411	0	0.613185	0.794027	0.511656	1.64202	1.10854	1.91279	4.15058	0.924982	0.0352167	0.272815	0	0.594246	0.353939	0.723007	4.26221	0.653688	0	1.46863	0.210164	0.200208	7.66127	0.338154	0.0951108	0.159228	0.0967588	0.305873	0.107392	0.0564892	0.108989	1.13197	1.83155	1.92446	1.94016
TCGA-44-2662	480	0	1.70749	1.06332	0.56177	0	0.657992	0.332147	0.0796411	0.465438	0.285128	0.00433322	0.0988883	0	0.9454	0.14724	0.196032	0.91496	0.0373882	1.16116	12.6196	0.68616	1.29772	0.940398	1.23523	0.719099	0.097824	0.323701	1.06327	0.686818	15.7061	0.477669	0.82844	1.46134	0	0.402318	16.31	0.815425	7.99253	0.0290882	0.388875	0.178808	0.209264	2.44918	0	1.58539	0.286793	1.2085	1.02391
TCGA-69-A59K	591	0	0.0226272	0.616791	5.26534	0.548854	0.658579	0.706441	2.22087	23.3688	0.808582	3.90772	0.020031	1.70953	12.7349	2.22695	0.119125	3.60726	1.00726	1.42692	11.1231	1.62155	1.24073	0.458363	0.109466	3.29109	0.416123	1.34337	0.162988	0.124854	6.18264	0.880492	0.0939736	1.61881	0.677463	0.10372	2.46891	4.2745	0	0.32996	1.69179	0	1.00144	0.0195099	0.0376418	0.742809	2.76524	1.96282	0.67008
TCGA-91-7771	492	0	0.027663	0.209462	0.0825279	0.498953	1.5432	0.115155	0.0920385	0.245893	0.449335	0.36807	1.22445	0.502402	0.468243	2.46733	1.89329	0.0773699	0.388875	0.670959	0	0	3.09801	1.52829	0.0892194	1.69088	0.847889	1.83395	0.149447	0.0915846	2.391	0.745235	3.44664	0.613517	0.325379	0.285308	0.687732	0	0.0602393	0.352971	0.260453	0.0387455	0.09069	0.095408	1.33456	0.0716941	1.19317	0.457078	0.27307
TCGA-L9-A8F4	476	0	0.0878486	0.598663	0.458643	0.0409787	0.195318	8.91382	0.365355	0.30503	1.92637	0.250472	0.0194423	0	0.464684	2.1615	5.20309	0.0307127	1.49222	3.40919	1.46687	0	4.10268	0.364002	0.106249	3.05718	0.807786	2.23834	0.435045	0.436264	8.69523	3.28698	0.136818	1.57909	0.046968	0.729869	1.51668	1.22426	0.143475	0	0.620335	0	0.972006	0	0	0.645085	3.23655	1.20961	1.08398
TCGA-78-7145	826	1	2.68897	0.488656	3.24093	0	0	0.111936	0.0447329	3.18195	0.0436775	0.0949216	4.2848	0.293015	1.25167	0	0	1.20331	0.693008	0.586983	9.91387	1.07056	0.324882	0.594229	0.303539	0.203952	0	0.186251	1.64639	0.0593497	12.2955	0.160979	0	0.846456	0.460048	0.369776	2.74831	0	0.585554	0	0.744625	0.0376624	0.264465	0.255038	0.134199	1.97455	0.322173	1.96233	1.59262
TCGA-55-8208	674	0	0.103046	0.0624206	0.725514	3.79416	0.649833	0.729232	0.377134	0.332038	0.16738	0.839439	0.109467	0.149718	0.261635	0.697244	0.217003	0.345849	0.820863	0.0499872	0.660726	0.787699	0.593773	0.303626	0.166174	0.0183901	0.50535	0.203928	0.482472	0.181951	5.80365	0.0616899	0	0.243283	1.07983	1.4879	5.97763	0.670157	0	0.976735	0.0798991	0	0.0337826	0.01777	0.0342849	0.213652	2.98779	1.07834	0.542508
TCGA-86-8073	740	0	0.113959	0.431444	1.39391	0.451847	0.138203	0.978425	1.37445	0.110794	0.509042	1.08306	0.0378314	0.0827869	2.41119	0.0438116	0.699955	0.219127	1.03462	1.48568	0.0380573	0.612505	1.43643	0.839452	0.091886	0.0571997	2.00843	1.66324	0.359132	0.911779	4.8852	0.469033	0.0295805	0.448412	2.63514	0.0163242	1.69202	0.992583	6.45214	0.155794	0.528586	0.0199518	0.0934006	0.0368473	0.0473947	0.147674	0.768023	1.3926	2.24986
TCGA-91-6836	417	0	2.11843	0.261126	0.602604	0	0.936029	0.205083	0	4.33129	0.360106	1.60533	0.0436132	0.107369	0.104239	0.833372	0.216142	1.03343	0.461706	1.31442	0.197431	0.0784572	0.652466	0.816536	0.11917	1.9233	0	0.280303	0.177436	0	20.6729	0.663606	0.920734	1.64776	2.87105	0.141143	1.08871	0.99171	0.48277	0	1.09141	0.103505	0.282647	1.74163	0.0819572	0.340486	0.53124	3.08651	0.12158
TCGA-69-7978	134	0	0.0177771	0.161528	1.32587	0.519662	4.75734	0.111003	0.591468	2.79989	0.519762	0.275151	0	0.0904005	0.601815	0.765453	0.124788	1.34245	0.333204	0.689886	1.99475	1.10411	1.13174	0.68749	0.0286675	0.674173	0.435904	0.765181	0.7363	0.11771	7.43481	0.69176	0	0.737657	0.266125	0.10186	3.38834	0.523009	0.0774233	0.259234	0.915641	0.024899	0.320541	2.63642	0	0.70645	0.681574	2.71702	0.789675
TCGA-38-4631	354	1	0.266594	2.42235	0.568099	0.0710618	8.22128	0.634158	0.0633568	3.07853	0.123724	0.134441	0.0337151	0.0553344	0	0.468536	0.401011	0.372815	0.178461	3.60258	0.508746	0.303256	0.761006	0.350679	0.184249	0.067968	0	0.188424	0.0685834	0.168118	7.85783	0.228	0	0.258846	0.040724	0.261864	2.68269	0.648695	0	0.0694215	1.81398	0	0.249714	0.0328381	0.316784	0	0.410674	1.46832	2.25569
TCGA-MP-A4TA	950	1	0.535634	1.41952	1.15853	0.0277619	11.1512	1.57939	2.74745	11.3264	0.108755	1.45447	0	0	0.283329	0.274566	0.744155	0.0312104	2.14388	1.3533	0	0.568674	5.32036	6.04172	0.503866	0.11949	0	0.441673	0.120572	0.81278	6.16042	15.6324	0.602485	0.614728	0	17.2381	1.20218	1.14042	0.680403	0.0406816	3.06542	0	0.439004	0	72.2504	0.385612	1.60439	3.0423	1.54216
TCGA-97-7937	564	0	0.0208645	0.126387	1.03328	0	0.151819	1.17253	0.0347095	0.76503	1.62675	0.0226622	0	0	7.50479	2.88768	0.183076	0.875329	2.68862	2.22667	0	0.863908	1.59008	0.384232	0.201878	1.40565	0	0.609037	0.300583	0.414459	4.42119	0.562084	0.389938	2.05993	0.446205	0.19128	2.01722	0.678456	3.04413	0.038032	0.196444	0.146117	0.957626	0.0899504	0.0347095	0.0540744	0.149989	4.45296	1.95662
TCGA-49-4512	905	1	0	0	1.27741	1.0568	0.274748	0.42439	0.0565327	0.103836	0.331193	0.0276832	1.20335	2.54278	1.15043	0	0.298182	1.0455	0.716574	2.55516	0.0907898	2.97652	0.836954	0.250326	0.219204	0.151618	0	0.823834	0.183589	1.83763	2.17924	0.406884	0.705675	1.17914	0.254363	0.272602	6.38331	0.263102	0.148003	0.371665	0.658732	0	0.668453	0	0.0565327	4.43302	1.66934	2.76071	3.0191
TCGA-55-8512	607	1	0.0526292	0.518054	0.361124	37.9869	0.787179	0.547711	0.306433	1.71045	0.51292	0.192928	0.0465906	0.611729	1.61465	0	1.75482	0	0.616533	1.40416	0	0.0419067	1.07608	0.58152	0.254611	1.12709	0	0.650955	0.331712	0.609843	0.807063	1.65412	0.054644	0.593025	3.48912	17.9728	0.109035	0.651946	0	12.9989	2.1278	0.0368569	0.0862694	0.0226894	0.131328	0.522863	0.945846	0.507264	0.0432933
TCGA-49-AAR0	4655	0	0.143014	0.216578	1.22309	1.09704	0.346877	1.98446	6.9788	9.27605	0.0774335	1.42392	0.0422016	0.571418	1.10951	0.586472	3.55549	0.133331	1.00522	6.12816	0.382082	0.151836	1.78328	0.219474	0.307502	1.40376	4.38348	1.08492	0.25754	0.736525	2.25956	0.0713476	0.989927	0.281369	2.16643	3.52362	0.362133	1.51324	0.10381	0.695167	0.580847	0	0.195356	0.0205519	0	0.803073	4.05525	2.16611	0.117645
TCGA-55-7995	889	0	0	1.1235	0.793098	0.00961299	0.687281	0.70774	9.30777	12.2918	0.577425	0.289589	0	0.067369	0.0654047	1.33102	0.108495	0.0432284	0.615609	0.412369	0.0825856	0.369211	1.01989	1.19545	0.947131	0.186188	0.852725	0.397635	0.139166	0.136455	10.558	0.370116	0.609812	0.563939	0.115689	69.4843	2.22013	0.550452	0.0336572	0	0.136961	0	0.405365	1.06614	0.0771362	0.186934	1.35183	1.31947	0.305142
TCGA-O1-A52J	1798	1	1.00997	1.88517	0.546557	0.0876502	1.06341	0.879967	0.429806	9.53859	0.26706	0.191336	0.187134	16.551	3.47872	0.288954	1.31899	2.72622	0.495269	1.08241	0	0.0748094	0.294693	0.778572	0.0757529	1.1632	0.287965	0.0348614	0.169187	1.65891	1.83365	0.140612	0.341415	0.688952	7.10761	0.538321	0.162202	0.727385	0.818353	0	1.23579	0.0986922	0.423509	0.0810075	0	2.55666	1.49148	4.07493	1.0047
TCGA-95-7567	163	0	1.90411	0.0228853	0.892664	0.0281971	1.74716	0.251632	0.0251398	1.62034	0.07364	0.869947	0	0.702609	1.91847	0.790133	0.18564	0.316997	0.212438	0.476498	0.161495	0.120331	0.842692	0.306126	6.01933	0.296665	0.0926385	0.882242	0.0816411	0.150095	7.37356	0.180939	0.031381	0.583822	2.11685	1.62787	3.0056	0.491401	0.0987242	0	0.326413	0.0634987	0.272486	0	0	0.104442	0.470757	3.49575	0.571838
TCGA-64-1676	1728	0	0	0.356724	0.562198	0	0.119029	0.367717	0	0.0408954	0.0956552	0.00799546	0.0781989	0	8.34824	0	0.20669	0.988238	0.482909	2.49961	0.157332	2.62592	0.369435	0.162673	0.189932	0.433524	0	0.0874064	1.00746	0.0974834	2.545	0	0.122288	0.716229	0.0314851	0.0674853	4.59551	0.13678	2.94949	0	0.456612	0.0824821	0.0482656	0.0507765	0.0489833	4.47696	0.211671	9.6898	4.55365
TCGA-44-3398	253	0	5.20531	0.656903	0.690186	0.854339	1.1544	0.338572	0.0601347	1.47102	0.14679	0	3.63205	0.643373	3.47999	0	0.126872	0.657159	0.338769	0.350704	0.434585	9.12431	0.898679	0.465982	0.145732	0.129023	2.10513	0.0625946	0.358025	0.359028	3.02359	0.108202	1.68893	0.310335	2.89897	0.165698	21.1939	0.531744	0.0787164	0.263564	0.0900904	0.0506298	0.0888804	1.27789	0.0300673	3.01353	2.31708	1.19455	4.5793
TCGA-64-1679	1686	0	0.12438	0.146502	0.766873	0.051573	0.13408	0.0575299	0.0229906	0.683323	0.0673444	0.270195	1.61493	0	1.95914	1.27515	0.460803	0.0773058	1.19804	0.402241	0.959976	3.38935	0.237617	0.381757	0.713163	0.283634	0.0847186	0.314522	0.696841	0.411789	7.05144	0.165471	0.114793	0.504249	0.724107	0.205885	15.9383	0.363792	0.993125	0.0251913	0.168389	0.0387134	0.339806	0.393232	0.0689717	0.107452	0.182139	1.80777	3.86529
TCGA-50-5051	478	1	3.06363	0.208517	0.0616168	0.278325	0.445289	0.358237	6.69997	20.8258	0.335482	0	0	0.125034	4.51565	0.317613	2.59757	0.0481381	1.37105	1.25238	0.183931	0.109638	4.75083	0.443743	2.609	0.90613	0.422033	1.61791	0.123978	0.341894	5.56663	1.23646	4.5748	0.24627	0.552122	9.9013	0.808245	3.57122	0.149919	0.313731	3.33631	0	0.39498	0.326486	0	0.0594757	0.701129	1.75371	0.566331
TCGA-95-A4VK	651	0	0.200495	0.417485	3.09539	0.109112	0.749704	3.12981	0.125076	0.577815	0.692043	0.265408	0.155304	0.600813	3.44674	1.00204	5.14578	0	0.763336	1.64124	0	0.0798233	0.791933	1.93843	0.808301	0.234814	0.153633	0.967146	0.225657	2.98703	4.05283	0.150036	0.0520425	1.97229	0.241186	0.516961	1.62689	1.86273	0.10915	0.274098	3.03975	0	0.123244	0	0.291845	0.129906	1.26114	1.51836	0.74218
TCGA-05-4417	455	0	2.88164	0.196131	0.734117	0.302067	0.0261773	0.0673914	0.215452	2.61722	0.105184	0.167047	0	0.0235213	0.274026	1.89205	3.01147	0.498064	0.758594	0.39266	0.432512	0.257814	0.481467	0.596261	0.208853	0.62117	0.595444	0.849005	0.291532	0	4.42348	0	0.336175	0.138985	0.0692432	2.07783	5.32163	0.150406	0.141014	0.0590189	1.34491	0	0.318443	0.0279174	1.93907	0.447541	0.814651	1.56037	2.34383
TCGA-38-4630	1073	1	0	0.160543	1.86247	0	0	1.07875	0	0.0687115	0.593125	3.99495	0.281545	0.0342283	0.149536	0.289823	0.0413424	0.131779	0.46916	0.657109	0.157348	0.487723	1.83368	0.32538	0.227942	1.20348	0.216623	1.0315	0.106059	0.0519966	16.1911	0.775688	0.195681	1.46632	0	0	6.47506	0.0729572	0.0513008	0	0	0	0.193083	0.0710946	0.0195954	0.172992	0.677418	0.227065	0.290689
TCGA-73-4662	912	0	2.13031	0.0181241	2.53502	0.394512	0.290281	0.572934	0	0.319147	0.330478	0.16574	1.40911	3.356	0.354513	0	0.189024	3.74898	0.672966	0.928899	0.0959227	0.190594	0.628445	0.484877	0.0385995	0.368437	0.366828	0.201319	0.129312	0.383021	2.23571	0.250768	0.0248524	0.899036	6.39867	0.384018	2.18195	0.111191	0.0521235	0.130893	0.0927965	0.0167627	0.235415	0.0515962	0.438011	2.02648	0.286784	1.20297	0.472561
TCGA-50-6593	336	1	4.44091	0.395602	0.837786	5.52413	0.132001	0.883549	0.271609	1.01589	0.15912	0.0177337	9.97296	0.0948867	0.690901	0	0.0573041	1.96356	0.535538	1.50482	0.348956	0.26001	2.2154	1.50335	0.263289	0.437065	0.400344	0.872391	0.58803	2.63062	12.1088	0.293228	0.0678077	0.280337	0.279332	1.1226	2.48053	0.151687	0.213322	1.54756	0.144679	0	0.321155	0	0.0543217	2.99021	0.156493	1.84343	2.41752
TCGA-49-4501	1421	1	0.0506174	1.07316	0.664438	0.078705	3.87753	0.0526775	0	0.576476	0.102774	0.0549789	0.078417	1.44329	1.12453	0	0.244279	3.34461	0.118593	1.2891	0	0	0.393987	0.163127	0.163253	0.242773	0.077573	0.219125	0.11394	0.391021	0.987907	0.0757569	0.131388	0.375711	1.21781	0.275528	2.16725	0.156756	0.30312	0.46133	0.0911098	0.017724	0.103715	0.0218221	0.0210514	0.94016	0.181938	2.61361	0.624576
TCGA-97-7546	1285	0	0.0482581	0	0.619071	0.285139	0.331638	0.502221	0	0.120645	0.156773	0.0524163	2.92639	1.47242	1.17422	0	0.381097	1.34972	0.0565327	0.585244	0.0644642	0	0.583056	0.0444352	0.194554	0.11842	0.295829	0.167129	0.782131	0.0798847	1.81644	0.433354	0.0501056	0.431565	7.04369	0.138255	0.166632	0.14945	0.0525438	1.53939	0.133636	0.0675915	0.237313	0.0416098	0.160561	0.771268	0.78056	0.564805	0.119093
TCGA-55-7728	704	0	0.851522	2.30093	0.667471	0.207691	1.70087	0.312768	0.138879	4.31327	0.379686	0.140547	0.354739	0.0970349	0.635888	0	0.175804	0.0700471	1.48651	0.688448	0	0.265896	0.923293	1.96785	0.3231	0.692789	0.204704	0.214775	0.0902015	0.552776	1.48968	0.499779	0	1.03326	1.8032	0.248737	0.0461215	0.698047	0.0363586	0.152173	0.110966	0.116928	0.109475	0	1.41657	1.6732	1.74039	0.344847	0.0549389
TCGA-50-6597	1268	1	0.85875	0.0619275	1.90315	0.279771	0.264492	0.170229	0.272112	1.02232	0	0.266499	0	3.80251	0	0	0.071763	0.514675	0.0958092	0.0991846	0	0	0.190027	0.225921	0.0659444	0.218938	0	0.0606951	0	0	0.57008	0	0.0849168	0.102396	0.787078	0.187447	0	0.696523	0.267147	0.96902	0.362368	0.0572756	0.402188	0.105778	0.340141	0.459255	0.538943	5.57433	0.538223
TCGA-05-4397	731	1	0.0112774	0.409879	1.56782	0.0140282	5.35208	1.12669	2.21377	2.06126	0.0549543	4.71898	0.0798677	0.335897	0.381779	1.00586	1.14786	0.473123	0.0528444	0.328237	0.271163	0.107757	1.1634	7.37267	0.381908	0.00503155	0	0.0613743	0.0203084	0.360919	16.8536	0.0337568	0.468366	0.334829	0	9.46003	0.529586	1.83355	0.147347	0	1.54272	0.0157954	0.388203	0.787626	0.131325	4.56926	2.33753	8.18332	0.204092
TCGA-62-A46P	594	1	0	0	0.761695	0.330827	0.086009	2.14042	0	5.43731	0.518395	0.0770323	0	0.283369	1.57561	0	9.58342	0.198358	1.32931	0.344036	0	0.0564721	0.972223	0.718334	0.228737	0	0	0.614044	0	0.978339	0.19774	0.106145	2.57728	0.202956	0.0379179	0.568915	0.195909	1.97672	0	0.129276	0.883774	0	0.174381	0	1.82873	0.0306345	5.99058	0.732399	0.0583407
TCGA-99-8025	1060	0	0.0679057	0.308506	4.78101	22.6483	0.46666	1.16604	0.423622	0.509293	0.523927	3.6694	0.0150286	0.0123327	5.96262	2.08851	0.506463	0.237405	1.23301	2.71761	0.226775	0.432567	1.11233	0.187579	1.80684	1.21945	0.416271	1.27666	0.0917137	1.62993	5.20663	0.203263	1.41011	0.643706	0.290445	0.641996	4.22053	1.02519	1.92234	5.13684	0.658152	0.0475552	0.528725	0.0292753	0.112966	0.278653	0.264419	5.16593	2.06682
TCGA-78-7166	258	1	0.844391	0.0255746	0.25191	0.14705	1.77498	0.386653	1.03948	17.9011	0.137156	0.15133	0	0.0613418	2.10818	0.415522	2.45983	0	3.4819	1.18787	0	1.07577	1.13006	0.4665	0	0.896629	0.310574	1.52065	0	0.298192	2.82516	0.505505	2.10412	0.525568	0.108348	0.0580587	0.51315	3.19028	0	0.123133	0.327358	0.0473071	0.0553649	0.0145613	1.60136	0.0291788	1.8615	1.02314	1.0558
TCGA-73-A9RS	340	1	0	0	0.524403	5.04116	0.63162	0.914656	0.243681	0.298388	0.396554	0	0	0.035471	0.10331	5.40621	3.68453	0	0.686391	0.94743	0	0.0777584	0.794137	0.269754	0.0787391	6.20865	0	1.57021	0	0.269422	8.03213	1.16924	0	1.55448	0.156632	2.0703	0.337193	0.756059	0.106327	2.22506	1.43324	0	0.240111	0.0421004	0.487363	0	11.7587	0.739542	0.160663
TCGA-44-2665	400	0	5.2117	0.0903722	0.902035	0.24744	0.369897	2.48419	0.0992751	6.22177	0	0.0378105	1.63769	0.245663	3.5775	0	0.628353	0.862349	0.233028	0.530722	0.531443	12.8615	1.29411	0.256427	4.84379	0.0177501	0.121941	0.236197	0.788075	0.351237	2.10756	0.476343	2.51973	0.846761	0.0425408	1.11698	45.9644	0.123206	2.42576	0.0725186	0.165254	0.0835837	0.130427	11.7831	0.0330917	0.704572	2.52631	1.97206	15.2834
TCGA-67-3772	573	0	1.62356	0.655651	0.24541	1.40024	5.35555	0.0450569	0	0.378831	0.0703248	0.0176345	0.804874	1.35244	1.32827	0	0.0379892	0.454089	0	0.840086	0.0578343	2.17187	0.130773	0.398652	4.25889	0	0.132702	0.0856804	0.116949	0.0955585	1.20713	0	0.0899048	0.162615	0.0694426	0.744218	6.99634	0.201119	0.235699	0.315674	0.0599458	0.03032	0.212906	0.0373304	0.036012	1.5148	0.129682	2.26532	4.34501
TCGA-49-6761	354	0	4.90381	0	0.51513	0	0.251283	0.143757	0.114899	6.13935	0.224376	0.0750189	0	0.050175	0.146136	0	0.242414	1.59368	0	0.418805	0.645834	0.329976	1.10729	0.445174	0.278448	0.400599	0.846789	2.76786	0.186566	0.228664	7.79916	1.44719	0	0.284124	0.221561	0.593619	3.29111	1.22989	0	0	0.0382522	0	0.226431	1.93546	0	0.626509	0.70339	4.70749	0.113632
TCGA-64-5778	926	0	5.75657	0.118877	2.27943	2.13194	0.148086	0.816935	0.0435294	0.312541	0	0.156315	0.046328	1.14053	1.218	0	0.459192	1.09776	1.16481	1.6501	0.908789	0.166682	0.595805	0.0481868	0.464156	0.093395	0.481208	0.155349	0.0471203	2.51225	2.99119	0	0.054336	0.168481	9.2612	0.449785	0.722802	1.74223	0.45584	0.476961	1.40571	0	0.128675	0.112807	0.217647	0.113025	1.97508	5.11611	0.301345
TCGA-50-8459	589	0	1.83498	0.666925	0.24817	6.52813	2.41326	0.203697	0	1.08739	0.158965	0.00664362	1.32121	0	1.65654	0	0.128808	0.102644	0.229292	0.178027	0	6.93547	0.432036	0.270338	0.315638	0.0218319	0.599928	0.0605234	0.440591	0.486008	3.27437	0.219706	0.101612	0.428846	0.0261617	0.392527	31.0213	0.871349	0	2.00689	0.0542014	0	0.0802102	0.0210957	0.529119	3.14933	0.527648	0.303194	4.99131
TCGA-86-7955	508	0	0	0.0963754	0.598057	0.00989539	0.797513	2.02002	0	0.1591	0.206744	1.88794	0.0422536	0	0.33663	3.7189	6.31004	0	0.0745522	3.20291	0.0425059	0.0506742	2.65419	1.05478	0.205254	0.00709844	0	0.928832	0.0286508	0.0526737	16.3244	0.714354	0.892031	1.17239	0	67.7332	0.373566	1.92159	0.58898	0.0290009	6.50292	0.0668519	0.130398	0.0274363	0.158804	0.0824679	0.0571866	4.33756	0.0785265
TCGA-05-4426	791	0	5.17337	0.921701	0.680907	0.149841	0.256288	0.554227	0.0210938	6.05814	0.123577	0.0034431	0.0785748	0.239497	2.49505	0	1.51313	1.47175	0.415912	1.23018	0.033876	0.54521	0.689392	0.186806	0.061343	0.022629	0	0.269753	0.0228339	1.18942	3.39393	0.56932	0.0263305	0.498933	2.86084	0.0290613	0.963217	0.274876	0.497012	0	0.421353	0	0.103924	0.021866	0.126563	0.317669	1.50401	2.81092	0.354639
TCGA-78-7158	179	1	2.23575	0.776555	0.24477	0	0.0663334	0.68308	0.0341222	0.21651	0.799612	0.0724063	2.21528	0.536428	1.12837	0	0.359956	1.20473	0.336399	4.42776	0	0.0979952	10.2274	0.83101	2.21616	0.00915143	0.125738	0.629177	0.0738743	0.248996	2.45914	0.368383	1.06484	0.476921	0.614119	0.0705164	0.821567	0.0635217	0	0	0.03408	0.0287289	0.201734	0.0176857	0.136489	0.708794	3.95663	1.21444	0.607426
TCGA-50-5942	883	0	15.3959	0.627718	0.441644	6.94232	0.335123	0.12325	0	2.39327	0.192368	0.0401982	0.0524207	1.31203	0.0626446	0	1.35091	0.0414042	0.208105	2.3698	0	0	0.742953	0.27262	0.71618	0.0132097	0	0.205075	0.0533172	0.16337	1.23826	0.177249	0	0.158865	0.538205	0.0678583	0.245358	0.275073	0	2.10478	0.0819884	0	0.0970647	0	0.443286	0.0767336	0.461155	0.244603	0.389686
TCGA-49-6743	369	0	0	0.29848	0.268803	0	0.933344	0.644658	0.374725	0.289389	0.182942	0.443451	0.174483	0.0613643	0.357451	2.42477	1.08707	0.236253	1.31939	0.409761	0.0752247	0.269042	0.497202	1.24446	0.0908118	0.628123	1.03563	0.431846	0.709867	0.155365	17.1927	0.0842819	0.116939	0.493531	0.42151	1.58107	3.53893	2.04916	5.15042	0	0.10916	0.0394371	0.32308	0.0242777	0.0936813	0.0486492	0.134941	4.30343	0.602212
TCGA-67-6217	422	0	0.343327	0.433274	0.887692	1.6727	0.277577	0.89325	0	0.91395	0.278837	0.116534	0.101312	2.86826	5.38765	0.17599	2.71128	1.00025	0.469229	0.48576	0	0.683447	0.398855	0.368818	0.184551	0.663777	0.175387	0.481272	0.103044	0.789349	1.35611	0.599483	0.534706	0.470783	1.04017	0.163934	0.316129	0.0886038	0.249212	0.208607	0.14261	0.0801455	0.140695	0	0.0951914	0.420184	0.822698	1.65457	0.800203
TCGA-95-7948	133	0	0	0.236143	0.827026	0.301729	0.224126	0.793368	0.144115	0.0673788	0.816144	0.635136	0	0.943998	3.4826	0	1.76351	0	0.324748	3.1938	0.0462888	0.220737	2.42343	0.542417	0	0.44062	0.212421	1.26866	0.0624014	0.325049	1.59415	0.311172	0	0.632169	1.01896	0.0595649	1.41188	0.134141	0	1.13695	0.143936	0.0728016	0.426009	0.104573	0.0576459	0	0.31138	1.33597	0.28505
TCGA-44-6777	987	1	0.391039	0	0.262485	0.0152007	0.671822	0.152608	0	0.393755	0	0.00663645	2.44484	1.38486	0.310266	0	0.0857794	1.05951	0.114522	0.474227	0.522358	1.20656	0.215785	0.405069	0.0394121	0	0.29964	0.241832	0.748196	0.188799	4.9744	0	0	0.183593	0.182935	0.840221	6.21106	0.189219	0.159662	0	0.121822	0.0342312	0.320494	0	0.0406575	1.5413	0.263539	2.05277	3.90028
TCGA-50-7109	308	1	0.214342	0.0405745	1.67857	1.88304	0.108309	0.278832	0	0.617722	0.52224	0.611129	0	0.0194639	0.623581	0	0.846337	0.112404	1.31825	0.649852	0.143161	0.0853364	0.983584	0.0493406	0	0.107585	0.49273	0.689296	0.144746	0.206975	5.30389	0.320796	3.83895	1.14051	0	7.33817	3.07145	0.788255	0.0583444	4.68846	2.80454	0.11258	0.746616	0.0231017	0.0445716	0.0694388	0.449416	4.35321	1.05792
TCGA-97-8177	499	0	0.253869	0.0961137	0.681639	0.217107	0.500299	0.363276	0	0.312929	0.309273	0.159414	0.224741	1.33709	2.31644	0.8296	0.278447	1.3757	0.1487	1.0006	0.0423905	0.277952	0.376034	0.613615	2.48194	0.523858	0.389063	0.125601	0.171438	0.350205	2.30044	0.0474943	0.560124	0.380277	0.13573	0.654582	2.47637	0.196551	0.552829	0.0289222	0.0790886	0.133341	0.234079	0.0273619	0.0791866	1.37073	3.13672	1.289	1.38353
TCGA-62-8395	1216	0	0	0.111639	0.615802	0.0917009	0.377476	0.971781	4.00615	0.102388	0.798292	0.627226	0.0435073	0.731908	0.155978	0	0.646851	0.756007	0.633304	0.596014	0.328253	0.0391333	0.765071	1.04082	0.237761	0.0548179	0	0.887498	0.132754	0.298301	0.822166	0.514885	0.204111	0.351606	0.210207	0.647679	1.08607	0.799051	0	0.0895843	2.36805	0	0.402801	0	0.0817581	0.0636861	2.20813	1.31958	2.54698
TCGA-38-4627	1147	1	0.3331	0.25222	0.238499	1.98888	0.511686	0	0.0277067	1.81817	0	0.0361801	0.103208	0.120992	0.176196	0	0.0876836	0.209619	0.078043	0.444359	0.0444961	1.29965	0.13931	0.0920136	0.188006	0.326956	0	0.0329601	0.539863	0.01838	0.882299	0	0	0.0655349	0	3.66452	15.3203	0.180525	0.0362681	0.485742	0.064569	0	0	0.0861631	0	0.316541	0.0199548	0.504518	19.5644
[truncated: 148 more columns]
