# Supplementary material for: Identification of a nine ferroptosis-related lncRNA prognostic signature for lung adenocarcinoma
Source: Research Square preprint supplement (doi:10.21203/rs.3.rs-210507/v1), 2021-02-11
Supplement: Supplementary file 2 [file 71088de57e57d1228086ee99.xlsx]

## Sheet: 诊断
Supplemental Table 7 Proportional Hazards Assumption in Cox model
lncRNA	chisq	df	p
AC099850.3	3.0904	1	0.079
NAALADL2-AS2	0.6761	1	0.411
AL844908.1	1.7866	1	0.181
AL365181.2	0.9434	1	0.331
SMIM25	0.4352	1	0.509
FAM83A-AS1	2.2325	1	0.135
LINC01116	0.2379	1	0.626
AL049836.1	3.1973	1	0.074
C20orf197	0.0258	1	0.872
GLOBAL	11.1633	9	0.265
